# Supplementary material for: Measuring Plant Cysteine Oxidase Interactions with Substrates Using Intrinsic Tryptophan Fluorescence
Source: Research Square preprint supplement (doi:10.21203/rs.3.rs-5245232/v1), 2024-11-13
Supplement: Supplementary file 1 [file 93c7d921edbbce80ed2cfc9d.xlsx]

## Sheet: Figure 2
Note: Absolute fluorescence intensity (pre normalisation) shown. Data was normalised to the max FI highlighted in red
Figure 2b																		Figure 2c
	Emission Wavelength(nm)	RAP2.12 concentration (µM)										Max FI	91702.1			Emission Wavelength (nm)	AtPCO4					Max FI	62415.7
		0	93.75	187.5	281.25	375	468.75	562.5	656.25	750		Wavelength	328.6				WT	W121F	W217F	W121/217F		Wavelength	327.6
	300	19298.1	16481.2	15173.6	13576.2	13668.4	12453.5	12773.3	12371.7	13055.5						300	13534.1	5729.62	3168.3	1122.3
	300.2	19687	16850	15474	13853.8	13850.4	12725.7	13013.8	12567.3	13261.7						300.2	13679.6	5778.3	3171.31	1167.07
	300.4	20263.2	17302.6	15878.8	14213.7	14176.3	13034	13290.3	12892.5	13603.2						300.4	14037.8	5842.93	3216.17	1144.84
	300.6	20742.8	17758.8	16248.3	14536.1	14572.6	13384.9	13598.7	13181.8	13937.8						300.6	14379.3	5981.54	3278.53	1144.88
	300.8	21392.5	18275.6	16706.7	14889.4	14935.8	13717.9	13884	13562.7	14249.4						300.8	14773.4	6080.64	3308.94	1156.35
	301	22087.4	18830.8	17259	15429.2	15371.4	14059.8	14302	13890.2	14638.3						301	15367.4	6182.26	3399.16	1132.2
	301.2	22537.1	19254.3	17622	15761.2	15727.7	14475.9	14669.6	14127.4	14982						301.2	15696.5	6343.66	3443.03	1173.83
	301.4	23041.9	19650.8	18039.5	16055.4	15968.3	14634.9	14955.6	14517.6	15246.3						301.4	15977.3	6405.05	3459.65	1168.3
	301.6	23454.4	20000.3	18362.1	16370.5	16398.6	14960.2	15121.1	14721.8	15533.8						301.6	16223.9	6486.07	3487.7	1167
	301.8	23977.1	20409.2	18691.4	16660.5	16590.1	15173.2	15506.2	14985.7	15730.9						301.8	16638.7	6622.31	3541.28	1150.84
	302	24422.9	20865	19076.3	16934	16920	15413	15682.2	15123.9	15993.4						302	16958.4	6669.91	3587.97	1157.34
	302.2	25010.6	21335.7	19439.7	17342.2	17253.2	15904.1	16044.3	15479.5	16361.2						302.2	17297.7	6756.09	3631.66	1168.21
	302.4	25471.6	21740.1	19805.5	17600.9	17608	16110	16345	15838.8	16649.9						302.4	17686.6	6849.81	3686.67	1169.21
	302.6	26198.5	22287.7	20314.8	18075.3	18048.2	16352.2	16619.8	16123.1	17040.4						302.6	18083	7017.23	3715.91	1161.48
	302.8	26798.8	22871.4	20820.3	18538.6	18419.7	16874.8	17016.7	16518.7	17388.5						302.8	18565.9	7118.47	3741.05	1163.08
	303	27456.3	23405.2	21339.9	18902.6	18849.2	17253.9	17497.8	16926.9	17711.8						303	19008.6	7257.17	3804.05	1182.99
	303.2	28213.1	24002.5	21860.5	19358.3	19309.8	17588.2	17751.7	17209.8	18183.9						303.2	19468.3	7388.93	3842.32	1188.4
	303.4	29123.3	24799.3	22578.2	20000.1	19983.7	18225.8	18366.5	17796.5	18662.7						303.4	20114.1	7550.42	3858.03	1174.68
	303.6	29879.5	25463.5	23136.5	20492.7	20540.9	18471.5	18713.9	18192.1	19187.3						303.6	20611.5	7738.76	3967.5	1193.59
	303.8	30728.8	26049.4	23697.8	20977.5	20811.1	18918.2	19204.5	18587.1	19592.7						303.8	21042.9	7886.62	4035.6	1197.19
	304	31363.2	26703.4	24384.5	21503.7	21355.2	19379.6	19585.3	18974.7	20082.1						304	21640.6	7994.38	4036.02	1201.64
	304.2	32057.4	27339.1	24804.9	21930.1	21816	19851.8	20059.7	19427.2	20422.5						304.2	22192.5	8177.01	4100.82	1205.26
	304.4	32748.6	27879.8	25348.8	22428.5	22239.3	20230.3	20411.7	19670.4	20839.7						304.4	22574.3	8327.07	4133.06	1208.99
	304.6	33279.5	28409.1	25798.3	22753.7	22680.6	20508.6	20736.3	20072.9	21091.4						304.6	22992.7	8514.17	4237.51	1183.32
	304.8	33875.1	28895.4	26236	23116.3	23070.8	20833.8	21115.7	20394.7	21487.2						304.8	23415.6	8533.88	4222.64	1213.12
	305	34441.1	29294.9	26672	23482.8	23414.4	21303.8	21363.9	20542.4	21721.9						305	23733.9	8703.53	4308.18	1218.65
	305.2	35013.7	29856.6	27058.5	23828.5	23755	21475.5	21678.2	20999.5	22114.3						305.2	24208.6	8750.81	4299.6	1224.8
	305.4	35644.2	30325.3	27490.7	24199.4	24065.3	21776.6	21941.4	21244.7	22345.4						305.4	24551	8908.69	4323.3	1210.38
	305.6	36406.1	31004.7	28134.4	24735.5	24743.7	22262	22354.6	21732.6	22814.1						305.6	25128.1	9051.58	4404.06	1213.35
	305.8	37187.6	31682.5	28785.1	25227.2	25185.5	22734.5	22889.3	22219	23302.8						305.8	25629.7	9270.46	4434.83	1205.47
	306	37996.4	32366.5	29311.4	25738.5	25712.7	23022.5	23361.3	22650	23783.5						306	26189.7	9349.99	4470.81	1209.94
	306.2	38633.9	33027.2	29876.8	26185.6	26094.7	23464.7	23768	23025.8	24125.7						306.2	26610.9	9533.87	4530.18	1222.27
	306.4	39485	33659.1	30454.3	26779.9	26628.6	23972.2	24252.8	23384.5	24555.1						306.4	27190.5	9681.62	4570.24	1190.05
	306.6	40175.7	34237.2	31003.5	27211	27093.8	24388.3	24578.2	23704.3	24967.3						306.6	27691	9820.09	4631.62	1200.53
	306.8	41197.8	35086.7	31737.8	27806.1	27694.3	24910.4	25168	24182.5	25440.7						306.8	28363.9	9963.68	4668.54	1214.21
	307	41978.9	35663.6	32391.3	28234.4	28110.1	25278.2	25574.7	24537.9	26005.6						307	28876.2	10164.6	4706.79	1222.79
	307.2	42580.9	36259.3	32795	28722.1	28648.8	25660.6	25986	24984.9	26403.2						307.2	29290.2	10312.8	4709.81	1203.65
	307.4	43145.2	36753.4	33242.8	29082.3	28995.6	25988.6	26262.1	25276.6	26626.5						307.4	29764.4	10450.4	4770.82	1218.78
	307.6	43758	37176.5	33691.9	29400.2	29374.6	26331.4	26450.3	25614.4	27076.6						307.6	30054.2	10583.9	4804.56	1183.22
	307.8	44428.5	37790.8	34194.1	29797.5	29760.1	26615.8	26889.8	26027.7	27338.4						307.8	30629.7	10705	4852.1	1212.8
	308	45016.8	38259.2	34571.7	30248.2	30260.8	26943.3	27147.8	26257.1	27721.7						308	31045.2	10714.2	4843.25	1197.48
	308.2	45493	38690.4	35049.8	30547.2	30548.9	27390	27486.4	26496.9	27945.9						308.2	31342.6	10915.3	4935.93	1195.67
	308.4	46194.3	39234	35435.8	30950.1	30941.8	27576.7	27831.9	26806.3	28267.5						308.4	31660.9	10964.1	4914.55	1197.14
	308.6	46773.6	39712.9	35936.5	31310.9	31303.9	27977.7	28193.8	27165.1	28576						308.6	32124.9	11105.8	4922.48	1179.56
	308.8	47579.9	40483.3	36580.2	31921.7	31905.4	28291.8	28626.1	27511.6	29142.6						308.8	32608.3	11271.5	5002.37	1175.39
	309	48545	41307.2	37312	32416.5	32461.8	28913.9	29078.2	28164.7	29656						309	33414.3	11435	5050.47	1163.48
	309.2	49374.7	41978	37992.2	33022.5	33006.3	29329.7	29574.8	28538.7	30125.4						309.2	33991.1	11600.2	5066.58	1159.93
	309.4	50207.9	42609.5	38502.2	33518.6	33480.7	29812.6	29972.6	28931.2	30452.3						309.4	34374.2	11753.8	5178.36	1162.4
	309.6	51056.7	43355.7	39084.8	33961.3	33970.1	30227	30587.2	29405.3	30926.3						309.6	35071.3	11937.1	5181.78	1144.62
	309.8	51756.8	44026	39568	34482.6	34494.2	30605.9	30903.9	29704.7	31420.4						309.8	35587.7	12037.1	5225.2	1119.55
	310	52696.8	44847.3	40367.8	35084.9	35120.9	31192.1	31255.6	30253.3	31919.1						310	36228.5	12263.8	5233.71	1141.11
	310.2	53455.9	45334.7	40826.2	35530.8	35512.3	31547	31720.7	30548.3	32232						310.2	36654.6	12343.9	5267.3	1102.53
	310.4	53941.5	45823.7	41225.4	35842	35945.6	31928.5	32191.4	30835.8	32579.1						310.4	37126.1	12435.7	5309.96	1092.44
	310.6	54418.1	46275.7	41645.9	36170.3	36070.1	32209.4	32362.6	31260.6	32932.2						310.6	37379.1	12567.8	5330.35	1094.05
	310.8	54868.3	46564	42054.2	36463.4	36415.3	32528.9	32576.5	31372.1	33074.6						310.8	37812.4	12602.5	5381.97	1101.37
	311	55508.5	47044.6	42408.9	36844.8	36733.8	32755.5	32919.2	31671.1	33389.4						311	38129.2	12696.2	5372.47	1080.52
	311.2	56137.8	47566.4	42983	37156.6	37200.8	33008.7	33257.2	32076	33827.5						311.2	38420.7	12898.4	5389.13	1068.97
	311.4	56677.2	48169.5	43368.5	37613.2	37495	33372.3	33631.6	32240	34105.1						311.4	38811.4	12906.6	5442.98	1075.2
	311.6	57179.6	48603.3	43738.6	37934.4	37912.2	33652.8	33924.4	32629.4	34319.2						311.6	39327.5	13083.2	5461.27	1040.01
	311.8	57951.7	49162.5	44239.3	38392.5	38390.1	34167.4	34378.8	33008.1	34715.2						311.8	39819.3	13172.5	5512.31	1035.49
	312	58633.7	49794.1	44788.9	38889.8	38794.5	34421	34600.4	33330.9	35162.6						312	40127.7	13293.7	5500.25	1020.94
	312.2	59506.7	50464.9	45483.6	39358.1	39355.1	34971.4	35112	33683.2	35581						312.2	40741.7	13469.4	5527.2	1009.79
	312.4	60215.2	51099.1	45983.6	39811.6	39851.8	35421.8	35434.5	34175.5	36001.9						312.4	41244.8	13664.4	5599.73	971.12
	312.6	61014.7	51725.8	46501.8	40268.3	40220.4	35694.6	36002.3	34477.3	36350.7						312.6	41755	13748.3	5583.45	968.428
	312.8	61545.2	52185.7	47014.5	40672.6	40601.1	36043.5	36082.3	34835.1	36694.9						312.8	42041.3	13843.7	5601.22	937.453
	313	62229.4	52801.3	47464.5	41020.3	41063.1	36361	36559.4	35026.4	37113.8						313	42543.1	13902.1	5657.88	934.68
	313.2	62802.8	53340.9	47957.2	41438	41514.5	36731.8	36922.2	35468.4	37300.6						313.2	42865.8	14016.9	5707.46	929.451
	313.4	63434.4	53839.1	48457.8	41870.6	41868.3	37192.8	37187.8	35810.7	37842.3						313.4	43447.1	14134.4	5716.34	909.726
	313.6	63828.6	54264	48702	42143.8	42219.2	37399.8	37534	35959.8	38090.1						313.6	43729.1	14194.4	5723.63	881.023
	313.8	64287	54553.2	49067	42312.2	42571.9	37579.6	37878.4	36289.5	38256.8						313.8	43942.8	14293.3	5734.1	903.466
	314	64781.6	54857.4	49380.7	42658.1	42695.5	37789.8	37943.8	36532.1	38414.6						314	44338.8	14329.6	5697.48	883.536
	314.2	65108.7	55380.2	49648.8	42926.8	42999.3	37964.8	38138.4	36682.3	38631.8						314.2	44458.8	14510	5762.77	861.357
	314.4	65810.4	55782.3	50145.4	43255.1	43397.9	38230.2	38465.2	36987.6	39030.9						314.4	44979.9	14584.5	5774.23	855.048
	314.6	66100.8	56103.7	50424.2	43523.8	43723.2	38511.3	38708.3	37095.7	39251						314.6	45079.8	14654.4	5759.3	826.995
	314.8	66656.4	56588.2	50895.4	43930	44180.8	38777.5	38964.5	37447.3	39609						314.8	45587.9	14681.9	5838.72	817.899
	315	67261.2	57174.6	51305.4	44228.7	44317.9	39118.3	39228.8	37781.2	39859.6						315	46084.6	14850.2	5843.72	811.446
	315.2	67895.1	57593.5	51721.7	44620.8	44616.3	39415.9	39725	37970.8	40238.1						315.2	46366.8	14978.3	5815.77	792.605
	315.4	68459	58111.4	52107.2	45096.7	45063.2	39823.5	40005.4	38365.6	40519.8						315.4	46751.8	15056.3	5875.79	787.838
	315.6	69338.7	58837.6	52845.3	45642.1	45590.7	40314.5	40466	38851.4	40899.5						315.6	47399.4	15270.4	5940.69	753.129
	315.8	69960.1	59512	53357	45887.9	46043.3	40615.8	40675.3	39175.5	41316.1						315.8	47805.3	15276	5938.9	735.479
	316	70488.1	59897.8	53746.4	46306.8	46456.5	40896.2	41018.3	39456.1	41680.1						316	48190.3	15432.6	5979.35	719.342
	316.2	71119.6	60404.7	54238.3	46778.7	46869.7	41077.8	41430.2	39730.9	42045.1						316.2	48626.1	15556.4	5968.75	728.144
	316.4	71782.1	60962.7	54601.7	47070.6	47095	41524.9	41783.6	40037.8	42281.6						316.4	49017.3	15624	5955.16	703.008
	316.6	72311.5	61412.8	55091	47443	47549.1	41858.4	42067.8	40476.4	42555.3						316.6	49424.3	15725.7	6007.23	678.486
	316.8	72787.4	61786.2	55509	47646.7	47875.6	42216.1	42307	40683.2	42926.1						316.8	49572.5	15827.2	6034.04	673.61
	317	73327	62150.8	55776.9	47912.2	48081.2	42356.8	42514.8	40860.3	43108						317	50072.6	15889.6	6040.7	658
	317.2	73638.2	62553.6	56020.1	48234.1	48480.9	42643.4	42681.1	40913.9	43288.7						317.2	50222.7	16050.4	6041.12	654.253
	317.4	74085.1	62885.5	56367.9	48494	48746.4	42860.2	42975.8	41256.3	43526.3						317.4	50682.9	16019.9	6046.48	642.533
	317.6	74584.8	63243.2	56729.5	48867.2	48998.9	43091.4	43368	41594.7	43765.8						317.6	50877.4	16083.6	6091.59	621.962
	317.8	75103.8	63726.5	57089.6	49180.6	49347.9	43359.2	43573.7	41816.1	44163.2						317.8	51110.3	16211.7	6090.72	613.245
	318	75646.2	64314.8	57623.2	49546.2	49654.1	43700.6	43841.5	42028.7	44418.3						318	51693.9	16409.1	6089.11	600.719
	318.2	76234.4	64660.5	57987.8	49840.4	49935.7	44050.3	44082.3	42344.6	44646.1						318.2	51945.9	16378.9	6108.42	584.321
	318.4	76784.6	65148.8	58352.7	50155.3	50334.5	44231.3	44367.2	42630.7	44905.7						318.4	52467.5	16534.5	6141.77	589.326
	318.6	77263.1	65564.4	58758.5	50627.2	50684.9	44656.2	44651.3	42872.8	45241.3						318.6	52676.1	16631.5	6172.05	572.619
	318.8	78007.7	66208.7	59299.5	51034.1	51139.5	44922.5	45135.8	43206.4	45716.8						318.8	53268.5	16792.2	6177.86	566.159
	319	78508.4	66572.1	59754.7	51332.2	51447.1	45392.3	45449.1	43582.9	45966.3						319	53681.1	16831.8	6196.17	557.072
	319.2	79238.6	67178.6	60070.2	51773.9	51790.3	45635.9	45712	43835.3	46209.2						319.2	53989.6	16961.7	6210.34	538.218
	319.4	79641.2	67633.5	60535.4	52054.7	52147.5	45845.2	46013.5	44069.1	46560.7						319.4	54401.7	17033.6	6268.85	526.128
	319.6	80048.5	67974.4	60891.6	52283.9	52462.5	46182.8	46169	44263.9	46760.5						319.6	54544.8	17124.5	6273.4	524.964
	319.8	80486.5	68331.2	61323.5	52629.9	52876.9	46598.2	46513	44559.7	47089.8						319.8	54947.5	17214.9	6288.45	517.913
	320	80817.6	68558.8	61511.3	52846	53079.9	46630.8	46640.2	44800.3	47322.1						320	55165.6	17323.5	6251.72	511.566
	320.2	81278.2	69000.6	61717.2	53065	53161.8	46712.2	46950.9	44971.4	47487.3						320.2	55264.3	17313.1	6313.87	499.925
	320.4	81715.1	69311.8	62057.8	53364.9	53478.9	46971.9	46912.5	45131.9	47652.8						320.4	55755	17409.8	6295.49	497.35
	320.6	81941.8	69616.6	62240.8	53475.4	53635.6	47080.7	47275.2	45289.9	47860.2						320.6	55877.3	17475.6	6316.35	494.196
	320.8	82319.5	69818.8	62560.9	53735.5	53865.9	47379.3	47497.5	45510.9	48022.8						320.8	56046.7	17571.5	6332.84	487.493
	321	82989.2	70336.5	63046.2	54117.4	54218.6	47685.2	47755.5	45760.4	48373.4						321	56580.2	17656.5	6312.82	474.919
	321.2	83439.4	70763.1	63430.5	54368.4	54594.7	47924.7	47978.8	46060.6	48656.5						321.2	56817	17729.3	6390.07	470.946
	321.4	83873.8	71127.4	63625.2	54638.8	54779.6	48136	48217.8	46226.1	48808.1						321.4	57136.3	17883.5	6352.97	466.631
	321.6	84309.7	71554.2	63993.5	54917.7	55224.9	48445.6	48475.3	46572.6	49116.4						321.6	57400.7	17899.2	6449.75	462.947
	321.8	84705.7	71935.1	64381.7	55188.8	55496.2	48571.3	48761.6	46773.9	49302.9						321.8	57729.6	18071.2	6459.56	456.011
	322	85270.1	72453.6	64747.5	55663.5	55711.4	49006.2	49040.1	47053.3	49680.7						322	58055.9	18115.7	6443.7	443.336
	322.2	85771.2	72703.1	65016.2	55784.3	56047.2	49150.3	49260.5	47282.9	49911.4						322.2	58508.2	18204	6424.15	450.579
	322.4	86069	73068.5	65275.4	56032.8	56079.2	49335.1	49590.1	47435.9	49958.3						322.4	58703.3	18286.7	6467.31	437.021
	322.6	86362.8	73191	65547	56251.9	56477.1	49506.1	49542.3	47508.8	50286.7						322.6	58769.6	18328.5	6449.31	435.769
	322.8	86605.4	73449.6	65681.4	56351.7	56627.6	49646	49854.3	47660.7	50360.2						322.8	58949.7	18368.4	6453.31	425.369
	323	86864.3	73684.1	65923.4	56554.4	56629.4	49772.6	49812.8	47889.1	50475						323	59151	18480.8	6497.56	422.656
	323.2	87142.4	73976.3	66182.7	56817.1	57047.8	50000	49936.8	48027.5	50822.1						323.2	59612.1	18453.8	6517.16	416.598
	323.4	87372.4	74153.5	66334.2	56901.9	57348.3	50052.7	50172.1	48012.4	50785.7						323.4	59613.8	18549.4	6483.3	414.613
	323.6	87692.1	74400.4	66517	57081	57258.7	50238.3	50240.9	48202.4	50873.7						323.6	59863.2	18494.1	6517.52	408.067
	323.8	87888.1	74635.7	66791.6	57216.5	57308.3	50328.8	50417.4	48355.3	51036.2						323.8	59934.9	18585.7	6533.27	411.552
	324	88378.3	74923.1	66967.4	57503.4	57646.5	50494.9	50707	48614.9	51315.6						324	60165.4	18655.2	6561.68	394.998
	324.2	88641.5	75240.9	67290.3	57641.7	57916.8	50607.3	50870.7	48896.7	51558.6						324.2	60315.6	18716.7	6525.18	393.314
	324.4	88936.7	75530.5	67529.9	57817.8	58066.6	50784.5	51076.8	48853.6	51625.4						324.4	60531.6	18836.5	6557.73	386.516
	324.6	89231.3	75748.1	67737.7	58020.5	58184.7	50894.8	51148	48991.8	51823.7						324.6	60669.3	18852.1	6577.54	393.273
	324.8	89530.8	75974.8	67862.7	58254.8	58389	51106.9	51206.9	49230.4	51972.1						324.8	60862.9	18878	6555.99	381.001
	325	89779.4	76126.2	68041	58272.9	58555.3	51266.7	51402.5	49394.2	52022.7						325	61063.1	18962.8	6575.31	377.907
	325.2	90022.5	76292.1	68225.2	58470.6	58786.9	51485.3	51529.1	49318.4	52195.1						325.2	61270.6	18994.1	6533.29	365.473
	325.4	90257.2	76553.1	68372.2	58588.7	59047.7	51476.3	51689.3	49517.8	52295.5						325.4	61432.8	19036.7	6618.51	367.651
	325.6	90410.5	76625.4	68424.5	58717.7	59023.4	51588.3	51630.9	49667.9	52394.8						325.6	61576.6	19007.9	6592.01	372.09
	325.8	90480.6	76748.7	68570.9	58642.4	59050.9	51613.3	51748	49575.1	52273.8						325.8	61569.2	19009.5	6553.45	369.135
	326	90591.3	76898.3	68663.2	58768.1	58992.1	51740.9	51773.8	49713.3	52446.5						326	61628.6	19096.3	6582.19	357.141
	326.2	90749.4	76886.7	68737.6	58896.8	59231.4	51729.9	51752.8	49885	52529.6						326.2	61699.8	19121.3	6627.81	343.439
	326.4	90827.7	77006.3	68847.4	58927	59201.2	51880.2	52031	49785.9	52565.2						326.4	61786.8	19122.8	6581.33	350.658
	326.6	90857.5	77120.6	68846.4	59016.3	59308.1	51935.3	52157.8	49878.7	52511.2						326.6	61918.7	19047.6	6567.68	341.493
	326.8	90943.4	77152.5	68838.1	59037.3	59231.5	52036.1	51994.8	49838.9	52730.5						326.8	61909.1	19109	6576.43	340.472
	327	91104.7	77242.4	69000.9	59174.9	59488.1	51977.1	52248.1	50002.5	52703.2						327	62057.8	19111.7	6599.71	341.568
	327.2	91210.6	77397.8	69155.3	59298.8	59575.3	52077.9	52097.1	50156.9	52716.6						327.2	62080.2	19152.1	6555.5	335.908
	327.4	91314.1	77494.6	69192.3	59240.2	59513.3	52083.9	52278.2	50026.3	52837.6						327.4	62269.3	19147.7	6589.76	320.588
	327.6	91423.6	77584.2	69355.6	59338.7	59623.1	52202.6	52322.6	50183.9	52885.8						327.6	62415.7	19242.3	6574.75	328.6
	327.8	91544.1	77596.7	69286	59450.9	59611.4	52165.2	52343.3	50193.3	52975.1						327.8	62341	19243.7	6538.62	325.067
	328	91423.7	77640.6	69364.2	59366.3	59727.9	52152.6	52271.8	50240.6	52781.3						328	62286.3	19155.2	6535.23	308.694
	328.2	91629.5	77756.6	69387.4	59471.2	59762.6	52323.5	52327.1	50150	52990.8						328.2	62302.6	19295.5	6510.67	297.895
	328.4	91640	77753.2	69407.2	59476	59773.3	52261.7	52239	50213.7	53098.8						328.4	62401.1	19219.4	6515	303.426
	328.6	91702.1	77733.7	69522.7	59505	59758.6	52287.8	52467.2	50209.8	53101						328.6	62396.2	19198.8	6545.93	302.522
	328.8	91644.4	77657.6	69352.2	59452.4	59868.3	52217.6	52334.7	50217.4	52912.5						328.8	62275.2	19186.7	6508.91	309.012
	329	91666.7	77693.1	69325.4	59437.2	59868.2	52260	52435.8	50062.8	52914.9						329	62297.5	19207.1	6549.92	292.351
	329.2	91565	77632.8	69354.5	59463.6	59714.4	52324.4	52376.2	50144.3	53005.4						329.2	62215	19244.9	6510.05	299.949
	329.4	91563.9	77720.5	69380.5	59395.8	59680.1	52202	52448.5	50199.2	53052.3						329.4	62341.4	19159	6515.67	300.213
	329.6	91604.4	77696.2	69429.6	59441.1	59674.3	52209.4	52446.2	50153.6	53013.8						329.6	62344.6	19169.5	6553.52	285.91
	329.8	91600.6	77670.2	69230.3	59365.4	59656.3	52339.9	52200.4	50142.6	52910.8						329.8	62147.7	19152.6	6506.36	283.67
	330	91583.3	77584.3	69329.6	59320.3	59723.2	52234.8	52298.4	50253.4	52974.5						330	62156.8	19187.5	6533.59	281.537
	330.2	91571.5	77722.9	69340.9	59325.2	59662.8	52097.8	52323	50160.4	52857.6						330.2	62197.9	19144.3	6524.11	287.909
	330.4	91392.8	77655.2	69315.8	59411.1	59704.2	52165.6	52239.6	50050.5	52986.2						330.4	62190.1	19140	6493.17	274.811
	330.6	91434.4	77607	69236.4	59287	59476.1	52127.2	52257	50128	52857.3						330.6	62103.7	19164.6	6482.29	276.791
	330.8	91343.1	77558.3	69206.8	59222.5	59638.1	52127.8	52256	49979.8	52766.4						330.8	62133.5	19125.7	6482.13	268.767
	331	91256.2	77463.8	69165	59239.1	59741.4	51969.6	52248.8	50151.8	52824.8						331	61983.1	19063.6	6457.65	268.372
	331.2	91176.1	77448.1	69141.5	59184	59580.3	52075.1	52200.1	49921.8	52843.8						331.2	62029.3	19135.5	6429.09	261.063
	331.4	91158.6	77389.4	69045.6	59111.4	59486.2	51923.8	52007.2	50018.9	52819.3						331.4	62012.3	19042.3	6410.96	256.471
	331.6	91130.7	77395.5	69026.1	59011.8	59411.8	52009.6	52034.3	49919.7	52667						331.6	61862.4	18966.6	6476.09	256.923
	331.8	91047.7	77256	68807.9	58961.3	59374.6	51940.6	51955.5	49812.2	52473.2						331.8	61844.7	18985.3	6436.2	258.607
	332	90836.7	77175.1	68787.4	58901.9	59255	51742.6	51917	49736	52439.4						332	61816.7	18944	6392.77	252.547
	332.2	90847.9	77073.8	68809.4	58914.8	59233.5	51733.6	51825.8	49683.8	52466.4						332.2	61622.6	18875.5	6416.41	254.846
	332.4	90663.1	77074.3	68624.5	58762.4	59196.2	51676.2	51775	49698.1	52504.8						332.4	61583.9	18928.4	6410.76	243.399
	332.6	90506.5	76890.2	68574.6	58723.7	59181.9	51744.2	51856.3	49642.3	52313.1						332.6	61518.2	18897.4	6384.88	246.333
	332.8	90537.9	76856.4	68547.2	58618.5	59046.2	51652	51657	49523.2	52217.2						332.8	61549.8	18900.6	6373.67	243.571
	333	90369.9	76793.9	68502.2	58572.3	58961.7	51494.3	51797	49460.7	52153.1						333	61369.8	18822.3	6359.44	232.145
	333.2	90328.9	76580.9	68356	58486.1	58894.9	51497.8	51456.7	49432.4	52179.4						333.2	61352.9	18823.9	6357.31	244.569
	333.4	90150.8	76556.2	68267	58430.9	58814	51439.2	51480.3	49337.8	52116						333.4	61184.4	18681.3	6361.32	237.525
	333.6	90065.8	76405.8	68109.8	58290.7	58634.6	51231.1	51385.4	49232.5	52127						333.6	61108.9	18671.5	6322.75	225.45
	333.8	89870.6	76299.8	68035	58190	58677.8	51190.9	51375	49185.7	52091.8						333.8	61015.4	18684.8	6321.56	236.857
	334	89695.7	76134.4	67989.3	58167.7	58539.5	51149.2	51203.8	49236.3	51811						334	60906.5	18684.7	6296.47	229.352
	334.2	89587.8	75986.3	67740.4	58010.1	58394.5	50999.2	51115.3	49032.3	51663.7						334.2	60707.7	18571.4	6306.78	226.85
	334.4	89256.1	75728.4	67641.4	57853.2	58274.3	50854.6	51018.3	48986.4	51569.3						334.4	60596.8	18557.5	6296.04	219.088
	334.6	89033.9	75607.4	67433.2	57748.8	58075.3	50741.9	50947.2	48886.2	51518.5						334.6	60455	18540.1	6253.21	212.939
	334.8	88909	75439.4	67350.2	57577.2	57924.6	50660.3	50782.2	48687.7	51363.9						334.8	60214.7	18425.5	6205.82	214.965
	335	88532.2	75284.3	67094.1	57456.6	57815	50428.9	50545.2	48492.6	51216.8						335	60162.2	18473	6275.45	214.338
	335.2	88623.1	75165.7	67049.8	57406.4	57765	50504.5	50596.1	48430.7	51188						335.2	60045.9	18437.4	6212.37	212.79
	335.4	88396.8	75037.1	66850	57277.4	57703.8	50335	50485.3	48333.9	50984.9						335.4	60003.8	18314.8	6151.52	206.773
	335.6	88165.8	74900.3	66749.5	57099.1	57565.3	50078.3	50408.6	48287.3	50956.5						335.6	59801.4	18322.7	6175.94	196.235
	335.8	87912.9	74790.9	66600.1	57034.3	57528.3	50150.3	50306	48321	50898.1						335.8	59772	18286.8	6135.79	202.539
	336	87794.9	74550.3	66579.1	56954	57325.6	50120.1	50141.8	48212	50759.9						336	59755.1	18161.5	6143.01	203.754
	336.2	87713	74488	66444.4	56813.6	57289.2	49943.6	50062.4	48087.3	50719.7						336.2	59500.9	18122.5	6123.09	195.179
	336.4	87489.3	74348.1	66243.9	56689.2	57125	49782.3	49883.3	48036.4	50593.4						336.4	59421.2	18103.8	6148.81	196.905
	336.6	87296.2	74105	65996.2	56607.4	56875.4	49812.7	49885	47792.7	50381						336.6	59277.9	18034.3	6092.04	192.246
	336.8	87117.9	73973.7	65953.6	56333	56910.4	49651.7	49807.9	47685.7	50297.6						336.8	59049.9	18099.7	6068.74	190.644
	337	86893.8	73748.6	65793.6	56281.7	56590.7	49494.5	49615.9	47753.8	50091.3						337	58946	17991.2	6056.98	186.669
	337.2	86583.7	73530.7	65577.7	56093.9	56506.5	49394.3	49411.6	47508.7	50057.8						337.2	58701.5	17923.5	6040.48	193.197
	337.4	86314.6	73289.4	65317.7	55882.2	56419.3	49145.4	49419.9	47261.7	49764.9						337.4	58489.1	17891.2	5944.3	192.07
	337.6	86003	73046	65105.5	55718.3	56154.1	49023.2	49090.1	47130	49695.3						337.6	58352	17833.2	5981.34	185.615
	337.8	85651.7	72771.9	64912.3	55558	56025.9	48855.7	48984.9	46956.1	49476.9						337.8	58216.2	17700.9	5935.6	177.623
	338	85390.3	72565.3	64705	55421.6	55853.8	48746.1	48721.3	46762.6	49380.4						338	58004.3	17741.8	5953.62	177.354
	338.2	85316.6	72426.4	64474.5	55220.3	55746.5	48530.2	48812.9	46680.5	49118.7						338.2	57679.3	17576.7	5926.79	175.891
	338.4	84966.4	72209.2	64420.3	55036.8	55494.4	48431.1	48577.8	46534.7	49139.6						338.4	57819.7	17626.6	5884.75	178.442
	338.6	84692.7	71986.4	64165.3	54989.5	55371.6	48283	48357.7	46364.6	48971.1						338.6	57519.4	17476.9	5924.55	177.579
	338.8	84416.6	71865.4	64048.1	54850.6	55056.8	48111.7	48315.4	46295.1	48849.3						338.8	57471.9	17495.7	5879.35	176.439
	339	84198.5	71624.3	63765.7	54600.9	55104	48126.9	48053.7	46089.8	48715.9						339	57136.8	17381.7	5822.69	174.351
	339.2	84041.8	71406.1	63559.8	54401	54874.7	47908.9	48001.7	46036.8	48445.4						339.2	56979.3	17371.7	5829.75	168.607
	339.4	83718.3	71143.6	63338.2	54255.2	54642.8	47768.6	47881.2	45897.3	48339.2						339.4	56779.1	17318	5785.24	166.613
	339.6	83265.2	70828.2	62994.7	53990.7	54529.3	47545.4	47630.3	45695.6	48241.1						339.6	56465.6	17220.1	5747.95	168.506
	339.8	82999.4	70568	62837.5	53875.7	54211	47401.1	47437.3	45492.5	47928.4						339.8	56200	17066.8	5800.84	167.573
	340	82597.7	70357.4	62609.8	53595.8	54029.3	47111	47228.1	45301.8	47748.2						340	56076.4	17129.7	5750.38	166.003
	340.2	82248.8	70034.8	62346.5	53348.5	53774.2	47065.3	47021.9	45154.8	47523.7						340.2	55866.8	16997.8	5672.43	163.392
	340.4	81963.1	69589.3	62036.1	53148.6	53596.9	46681.6	46892.6	44997	47355.7						340.4	55640.9	16931.1	5678.44	162.035
	340.6	81600.6	69358.3	61738.4	52895.8	53334.5	46553.3	46648.5	44663.2	47114.8						340.6	55296.3	16863.2	5617.04	161.438
	340.8	81224	69027.3	61446.3	52561.9	52984.5	46241.9	46381.8	44504	46986.4						340.8	54931.9	16752.3	5620.84	156.157
	341	80886	68850.3	61245.7	52381.7	52878.6	46148.3	46207.8	44324.4	46759.2						341	54853.1	16685.4	5629.44	154.929
	341.2	80473.2	68478.9	60968.8	52152.3	52698.8	46005.1	46033.3	44161.7	46567						341.2	54649.5	16681.9	5587.14	156.572
	341.4	80253	68285.2	60738.2	52009.4	52513.1	45748.4	45871.3	44054.9	46376.5						341.4	54427	16564.6	5558.55	149.744
	341.6	79902.6	68051.4	60518.1	51872.7	52236.9	45597.7	45822.2	43821.4	46172.5						341.6	54236.7	16479.8	5495.17	151.776
	341.8	79696	67725.7	60289.5	51626.1	52031.7	45502.1	45642.5	43620.4	46062.4						341.8	53928.8	16400.9	5523.09	145.36
	342	79331.9	67418.9	60107.8	51394.6	51993	45159.2	45310.1	43499.1	45878.5						342	53876.4	16371.4	5464.44	145.548
	342.2	79127.1	67317.9	59919.9	51215.9	51655.9	45038.3	45207.6	43477.2	45672						342.2	53602.1	16323.4	5443.13	144.858
	342.4	78696.1	66899.8	59604	50909.1	51385	44962.5	44940.8	43177.8	45545.6						342.4	53286.3	16199.1	5451.32	139.669
	342.6	78303.5	66618.4	59286.8	50753.2	51237.3	44593.6	44747.8	42971.2	45223.7						342.6	53069	16101	5392.68	143.909
	342.8	77986.5	66349.9	58998.5	50547.7	51004.4	44522.1	44486.9	42683.7	45168						342.8	52832	16102.1	5388.11	138.637
	343	77674.1	66011.7	58886.3	50279.1	50678.5	44149.9	44295.5	42459	44886.4						343	52503.1	15967.8	5377.24	137.938
	343.2	77236.5	65720.9	58463.3	50023.6	50464.4	44055.5	44160.2	42247.5	44627.1						343.2	52393.2	15896.9	5308.86	137.678
	343.4	76720.1	65273.9	58121	49702	50182.7	43758.2	43912.5	42028.6	44391.1						343.4	52034.8	15809	5294.12	136.451
	343.6	76304.7	64925.1	57828.9	49412.9	49979.5	43539.8	43619.3	41796.2	44132.5						343.6	51810.1	15758	5292.23	134.671
	343.8	75991.9	64644.3	57448.2	49177.2	49643.8	43291.1	43355.5	41680.5	43911.7						343.8	51449.9	15605	5241.54	134.059
	344	75619	64317.6	57231.9	48976.7	49575.4	43065.4	43283	41448.5	43638.2						344	51245.1	15572.8	5217.54	131.096
	344.2	75378.5	64089	56953.4	48785.5	49382.8	43000.9	42955.8	41371.3	43518.3						344.2	50991	15514.5	5174.12	126.783
	344.4	74901.7	63724.1	56725.6	48579.1	49027.6	42804.1	42800.9	41054.8	43339						344.4	50682.9	15439.4	5139.34	127.701
	344.6	74676	63546.4	56512.8	48340.8	48834	42521.9	42658.5	40835.7	43079.9						344.6	50477.5	15296.5	5143.19	130.628
	344.8	74283.3	63222.6	56288.4	48142.4	48603.2	42402.9	42450.8	40693.7	42876.6						344.8	50321.2	15294.9	5107.93	123.773
	345	73991.1	62998.6	56074.6	47980.3	48353.4	42216.7	42267.4	40610.8	42816.8						345	50083.6	15199.9	5089.82	121.403
	345.2	73715.2	62757.2	55820.8	47767.4	48189.5	42006.3	42147	40481.4	42590.1						345.2	49903.2	15145.5	5055.34	123.346
	345.4	73162.2	62308	55438.2	47452.3	47868.5	41697	41929.9	40199.7	42288.1						345.4	49578.3	15072.4	5055.39	125.85
	345.6	72844.3	62025.3	55178.2	47218.9	47654.7	41529.6	41713.5	40028.6	42108.5						345.6	49386.4	14940	5010.56	120.769
	345.8	72429.3	61651.9	54886.4	46964.4	47365.5	41311.8	41416.4	39745.3	41905.7						345.8	49076.2	14795.8	5004.35	118.956
	346	72044.4	61336.4	54596.6	46668	47166.3	41184.2	41165.7	39542.4	41662.2						346	48792.2	14795.5	4970.26	116.539
	346.2	71598.2	60984.5	54200.9	46506.9	46912.1	40984.4	40875.3	39274.6	41365.5						346.2	48483.8	14661.1	4941.95	123.971
	346.4	71077.8	60504.9	53774.2	46091.2	46542.4	40524.8	40597.1	38991.3	41199.3						346.4	48104	14589.9	4912.71	117.871
	346.6	70577	60114.6	53454.8	45757.4	46175.9	40294.8	40456.4	38714.1	40907.4						346.6	47748.7	14498.8	4903.31	119.395
	346.8	70113.9	59648.7	53157.4	45466.3	45937.7	40094.4	40096.1	38509.9	40617.5						346.8	47562.6	14395.6	4848.15	116.302
	347	69774.2	59332.4	52851.2	45218	45616	39820.6	39960.8	38329.1	40393.9						347	47250.6	14273	4808.91	113.866
	347.2	69302.6	59045.7	52543.8	44991.8	45388.8	39635.6	39792.9	38068.6	40223.1						347.2	46890.3	14199.7	4794.15	109.821
	347.4	68921.1	58790.3	52208.2	44662.3	45136.6	39320.9	39471.8	37870.3	39830.7						347.4	46697.5	14131.8	4753.35	110.785
	347.6	68556.3	58346.2	51946.2	44486.1	44967.7	39139.7	39237.5	37586.9	39750.8						347.6	46431.4	14101	4712.11	109.012
	347.8	68249.7	58159.6	51704.7	44252.2	44799	38880	39053.4	37397.8	39596.8						347.8	46247.7	14014.8	4725.67	110.708
	348	67893.6	57758.6	51384.9	44073.3	44441	38797.2	38866	37214.8	39306.1						348	45963.5	13895.9	4683.2	106.13
	348.2	67534.2	57541.1	51201.7	43865.2	44257.4	38597.1	38659.6	37035.2	39042.2						348.2	45696.9	13773.1	4656.4	106.241
	348.4	66996.7	57149.5	50823.2	43560.8	43936.6	38303.1	38382.2	36857.3	38824.9						348.4	45439.9	13714.6	4641.05	105.677
	348.6	66643.2	56820.8	50528.1	43218	43774.8	38120.1	38145.6	36603.3	38573.4						348.6	45138.6	13661.5	4620.82	104.369
	348.8	66168.2	56445.1	50181.4	42981.1	43394.3	37792.6	37846.6	36434.6	38329						348.8	44819.5	13542.1	4559.77	99.276
	349	65812.7	55995.2	49908.2	42669	43091.7	37533.4	37634.2	36170.7	38077.7						349	44632.2	13464.6	4524.91	100.842
	349.2	65411.8	55613.2	49563.9	42444.9	42797.9	37314.1	37366	35884.3	37804.4						349.2	44241.7	13394	4504.76	95.938
	349.4	64786	55215.9	49082.5	42057.1	42468.2	37017.9	37177.1	35660.6	37601.3						349.4	43920.6	13254.2	4491.61	94.135
	349.6	64372.5	54815.8	48735.3	41767.7	42184.5	36733.1	36946.9	35366.5	37262.7						349.6	43571.5	13141.8	4468.75	97.819
	349.8	63902.4	54452.3	48467.1	41442.6	41922.8	36476.9	36560.3	35103.6	36967						349.8	43344.7	13030.7	4448.84	96.562
	350	63525.3	54096.3	48045.6	41190.1	41658.4	36227.2	36307.3	34824.4	36720.8						350	42884.1	12996.6	4427.81	99.545
	350.2	63153.1	53817	47807.6	40948	41302	36138.4	36179.7	34679	36525.3						350.2	42742.2	12862.5	4372.44	98.508
	350.4	62734.3	53389.6	47516.1	40687	41158.4	35810.9	35851.8	34475.6	36200.6						350.4	42461.3	12845.3	4355.22	96.894
	350.6	62390.7	53127.4	47243.3	40456.1	40989.8	35678.6	35680.5	34273.6	36096.4						350.6	42282.7	12713.2	4332.5	92.169
	350.8	62071.5	52859.2	47045.3	40204	40640.6	35388.6	35420.9	34124.2	35984.6						350.8	42006	12627.1	4300.56	95.698
	351	61701.2	52546	46694.9	40023.1	40334.7	35109.2	35321.9	33981.6	35736.5						351	41623.6	12550.8	4266.26	96.334
	351.2	61293.2	52212.4	46478.1	39778.3	40219.3	35127.9	35081	33712	35572						351.2	41517.9	12585	4226.69	96.642
	351.4	60936.4	51930.6	46200.8	39535.5	39952.3	34816.1	34907.6	33448.5	35313.5						351.4	41137.7	12429.1	4229.05	89.83
	351.6	60503.8	51566.5	45842	39274.5	39714.1	34587.4	34686.7	33253.7	35081.3						351.6	40950	12339.4	4196.18	91.727
	351.8	60071.3	51239.4	45532	39018.8	39552.8	34408	34435.8	33150.4	34798.4						351.8	40724.2	12275.1	4179.71	87.97
	352	59719.9	50953.6	45244.3	38768.6	39191.6	34181.3	34153.5	32802.5	34614						352	40511.4	12191.1	4147.75	92.807
	352.2	59260.1	50488.8	44879	38457.1	38868	33786.4	33913	32496.8	34415						352.2	40056.6	12071.2	4117.9	89.343
	352.4	58743	50083.9	44547.5	38165.3	38585	33577.9	33732.9	32359.6	33977.9						352.4	39735.5	12015.9	4059.48	86.444
	352.6	58363.3	49704.2	44146.1	37849.5	38242.1	33284.2	33465	32122.5	33759.4						352.6	39530.5	11913.9	4057.84	87.022
	352.8	57920	49376.3	43901.6	37595.6	38029.5	33058.9	33122.1	31836.6	33438.8						352.8	39220.9	11830.1	4010.77	81.55
	353	57447.2	49068.3	43533	37351	37770.2	32800	32839.3	31580.9	33338.6						353	38902	11709.9	3980.03	82.7
	353.2	57051.3	48682.4	43213.2	37063	37456.3	32721.2	32632.2	31394	33131.1						353.2	38601.8	11577.5	3996.03	82.45
	353.4	56673.7	48353.8	43013.8	36858.8	37163.5	32360	32481.9	31217.1	32834.1						353.4	38433.4	11531.3	3923.11	77.772
	353.6	56407.2	48074.7	42746	36647.9	37023.4	32281.8	32285.1	30929.2	32701.7						353.6	38129.1	11504.5	3922.36	80.58
	353.8	56052.9	47831.6	42528.4	36364.1	36816.6	31967.2	32113.3	30813.7	32504.8						353.8	37886.7	11396	3914.5	83.852
	354	55720.6	47483.8	42282.7	36160.8	36531.9	31849.6	31933.6	30674.3	32342.2						354	37625.8	11351.3	3895.28	80.253
	354.2	55318.9	47175.9	41950.6	35948	36261.5	31693	31695.8	30408.2	32031.7						354.2	37463.9	11212	3838.21	80.087
	354.4	54967.8	46934.8	41635.3	35757.5	36124.6	31485.7	31590.9	30320.8	31898.4						354.4	37208.1	11176.7	3826.12	81.513
	354.6	54633.1	46615.2	41327.3	35493.6	35934.9	31277.4	31362	30000.9	31636						354.6	36916.7	11084.3	3805.14	76.392
	354.8	54188.9	46234.2	41122.2	35247.3	35539.6	30960.4	31044.8	29781.8	31508.8						354.8	36650.8	11034.2	3780.98	77.794
	355	53764.9	45872.1	40793.7	34963.9	35251.6	30744.7	30859.2	29558	31172.6						355	36376.1	10974.1	3750.19	78.851
	355.2	53214.5	45469.8	40427.2	34639.4	35009.6	30493.4	30499.7	29302.7	30898.7						355.2	36031.6	10815.5	3680.02	79.942
	355.4	52910.1	45038.8	40057.8	34327.8	34683.6	30254.4	30285.2	29060.9	30614.3						355.4	35783.7	10701.9	3692.03	74.849
	355.6	52402.8	44655.4	39713.3	34066.4	34382.6	30050.8	30071.9	28945	30406.3						355.6	35517.4	10670.6	3655.85	72.825
	355.8	51967.4	44365.4	39454.1	33754.1	34135.1	29688.9	29761.3	28608.1	30181						355.8	35137.9	10562	3626.74	73.387
	356	51521.4	43944.2	39099	33492.8	33870.9	29454.9	29558.6	28331	29793.9						356	34832.2	10475.5	3599.74	72.008
	356.2	51167.4	43735.4	38816.1	33298.9	33624	29277.4	29346.1	28226.5	29735.9						356.2	34596.1	10360.7	3552.16	70.736
	356.4	50817	43459.2	38589.6	33048.9	33440.5	29033.7	29174	27981	29504.6						356.4	34330.4	10387.4	3539.24	71.497
	356.6	50491	43127	38324.9	32882.5	33217.3	28959	29017.2	27740.9	29308.7						356.6	34203.3	10309.2	3527.28	74.008
	356.8	50247.3	42870.3	38117.2	32656.9	33051.2	28804.9	28854.9	27633.3	29149.2						356.8	33881.2	10177.2	3489.71	69.82
	357	49878.2	42519.7	37793.4	32396.8	32713.3	28548.2	28646.5	27367.8	28873.3						357	33682.3	10122.3	3484.96	70.378
	357.2	49512.3	42238.4	37496.6	32141.1	32526.7	28349.6	28409.2	27255.8	28704.1						357.2	33525.2	10051.1	3455.57	64.906
	357.4	49227.4	41982.7	37339.7	31911.8	32343.3	28133.3	28139.1	27123.3	28488.7						357.4	33188.2	9953.41	3417.64	70.282
	357.6	48824.6	41651.6	36985.2	31715.2	32082.8	27937.3	27988.3	26842.8	28382.1						357.6	32986.3	9919.91	3424.24	69.04
	357.8	48411.6	41358.2	36715	31443.9	31772.6	27648.8	27736.4	26646.8	28195.3						357.8	32791.6	9792.37	3390.51	67.617
	358	47919.8	40927.8	36370.4	31141.2	31509.3	27372.7	27574.6	26344.9	27879.5						358	32476.8	9682.96	3328.14	64.467
	358.2	47514.2	40572.6	35994.2	30896.2	31317.2	27159.5	27275.4	26164.2	27598.4						358.2	32085.7	9637.17	3336.28	64.72
	358.4	47099.3	40239.4	35724.6	30631.6	30943.7	26982	27090.3	25971.7	27338.2						358.4	31912.6	9564.61	3291.16	69.337
	358.6	46730.2	39881.7	35416.1	30398	30748	26714.5	26828.1	25794.9	27086.1						358.6	31638.7	9477.56	3280.03	65.088
	358.8	46319.4	39576.1	35128.8	30050.3	30451.4	26535.7	26544.5	25474.6	26840.3						358.8	31326.9	9379.6	3229.78	64.191
	359	45930.3	39181.8	34835.2	29836.7	30209.5	26350.2	26348.2	25291.8	26757.8						359	31119.2	9304.17	3222.36	58.499
	359.2	45677.4	38917.6	34600.6	29662	30010.1	26053.9	26159	25110.2	26448.6						359.2	30815.9	9208.45	3202.19	61.249
	359.4	45285.9	38678.9	34389.4	29445.7	29801.7	25959.9	26062	24910	26270.3						359.4	30536.4	9210.46	3152.36	63.148
	359.6	45048.8	38432.8	34174	29240.4	29566.4	25769.4	25861.3	24781.4	26201.2						359.6	30413.3	9135.87	3139.72	59.917
	359.8	44693.1	38149.1	33900.7	29045.5	29310	25466.8	25710.3	24589.3	26011.3						359.8	30150	9043.51	3120.56	60.811
	360	44350	37940.9	33644.1	28840.4	29230.5	25381	25445.9	24502.4	25779						360	30022.6	8965.39	3101.22	57.778
	360.2	44100.8	37620.2	33430.4	28669.5	29034.4	25222.5	25320.8	24333.5	25615.5						360.2	29798.9	8908.68	3063.55	60.739
	360.4	43769.7	37371.3	33211.4	28469.6	28859.8	25078.1	25135.9	24104.7	25486.1						360.4	29639.1	8839.2	3074.75	62.301
	360.6	43402.2	37083.4	32965.9	28271.6	28603.9	24922.2	24941.2	23886.5	25216.3						360.6	29430	8770.8	3018.28	58.744
	360.8	42988.2	36751.3	32653.8	27939.2	28234.9	24630.8	24751.5	23769	25074.3						360.8	29134.2	8696.51	3009.16	57.005
	361	42667.6	36445.1	32330.5	27772.9	27888.8	24415.2	24490.8	23495.4	24705.5						361	28829.6	8657.9	2981.01	58.565
	361.2	42236.9	36101.8	32072.5	27501	27738.8	24186.7	24246	23233.2	24522						361.2	28591.2	8533.6	2943.59	56.198
	361.4	41850.7	35733.2	31723.3	27216.9	27485.7	23943.7	24039.1	23061.5	24365.9						361.4	28247.1	8489.84	2945.57	58.11
	361.6	41354.5	35349.1	31358.5	26908.8	27245.7	23778.7	23843.7	22832.7	23987.5						361.6	28006	8388.62	2878.08	56.45
	361.8	41018.3	34987.1	31068	26678.4	27062.7	23473.8	23508	22608.1	23783.8						361.8	27724	8267.49	2866.77	53.548
	362	40618.6	34725	30823.6	26444.8	26676.3	23226.9	23247	22318.6	23574.7						362	27395.1	8256.27	2841.29	53.543
	362.2	40267.9	34377.7	30554.4	26173.8	26535.1	23045	23027.1	22171	23352.3						362.2	27186.2	8120.04	2816.05	50.936
	362.4	39908.6	34167.5	30278.8	25969.6	26298.7	22800.8	22911.1	21962	23260.6						362.4	26946.5	8055.8	2821.95	52.487
	362.6	39609.5	33866.3	30080.8	25741.6	26082.2	22715.8	22767.1	21935.3	22947.4						362.6	26801	7988.7	2800.91	53.548
	362.8	39288.7	33564.4	29788.9	25563.8	25883.8	22525	22583.7	21731.6	22779.9						362.8	26529.9	7948.1	2754.91	50.48
	363	38963	33330.6	29588	25425.2	25744.3	22371.4	22433.8	21545.1	22653.3						363	26386	7860.4	2750.1	53.865
	363.2	38715.9	33073.2	29374.8	25179.5	25549.6	22269.8	22244.3	21449.2	22516.4						363.2	26171.8	7797.85	2737.01	51.833
	363.4	38481.2	32844.4	29181.3	25023	25269.3	22055	22071.7	21173.1	22429.6						363.4	26030	7749.87	2700.77	51.017
	363.6	38051	32557.8	28968.5	24764	25081.2	21844.9	21931	20979.7	22126						363.6	25748.7	7660.65	2663.24	53.683
	363.8	37711.3	32246.1	28683.6	24543.7	24895.7	21638.6	21720	20895.5	21980.8						363.8	25507.2	7583.35	2652.51	51.166
	364	37366.1	32005.9	28402.4	24326.5	24582.8	21415.6	21473.5	20695.5	21746.9						364	25290.7	7564.29	2642.53	50.416
	364.2	37052.6	31671.1	28067.1	24144	24372.8	21329	21283.7	20429	21600.9						364.2	25035.2	7434.47	2619.45	46.775
	364.4	36657.9	31284	27799.4	23812	24160.5	20983.1	21069.5	20301.6	21271.5						364.4	24819.5	7376.21	2605.44	53.864
	364.6	36264.9	31049.3	27509.4	23620.5	23912.7	20774.4	20841.2	19999.8	21111.4						364.6	24521.2	7290.1	2539.74	49.493
	364.8	35935.3	30755	27298.5	23391.4	23600.6	20652.9	20635	19872.3							364.8	24251.7	7220.25	2530.85	48.587
	365	35707.7	30470.4	27062.1	23218.8	23506.1	20448.4	20505.7	19642.6							365	24132.3	7170.02	2519.96	46.21
	365.2	35295.8	30200.4	26800.7	22971.4	23250.8	20248.6	20273.5	19479.3							365.2	23779	7137.77	2488.62	45.042
	365.4	35014.2	29897.2	26568.5	22763.8	22944.2	19998.4	20090.3	19336.9							365.4	23597.5	7013.43	2484.97	49.556
	365.6	34704.3	29653.8	26341.4	22589.6	22892.7	19853.8	19933.9	19127.4							365.6	23459.4	6969.52	2456.7	46.766
	365.8	34374.7	29461.5	26127.8	22424.1	22672.8	19728	19732.8	19010.2							365.8	23289.3	6900.57	2441.23	47.908
	366	34222.2	29221.3	25948.8	22225.7	22551.5	19580.3	19676.5	18943							366	23042.7	6896.91	2435	44.679
	366.2	33858.2	28967.3	25765	22062.5	22328.8	19410.1	19458.5	18786.4							366.2	22859.6	6808.34	2394.56	44.686
	366.4	33639.3	28790.2	25507.8	21917.7	22200.9	19289.7	19350.1	18563.9							366.4	22771	6761.11	2408.57	41.506
	366.6	33387.2	28554.8	25361.6	21719.6	22080	19079.3	19220.6	18467							366.6	22470.4	6704.25	2362.53	45.918
	366.8	33118.7	28271.8	25111.4	21546.3	21803.3	18921.1	19027.3	18244.1							366.8	22301.6	6652.03	2342.13	45.256
	367	32802.2	28075.3	24920.9	21357	21600.5	18804.1	18847.5	18162							367	22186.5	6594.79	2316.23	42.526
	367.2	32459.5	27737.3	24601.1	21091.5	21424.4	18597	18633.3	17919.1							367.2	21874.1	6501.4	2293.06	43.432
	367.4	32093.6	27470.6	24387.2	20909.6	21158	18425.6	18490.8	17733.5							367.4	21693.5	6430.39	2291.38	43.463
	367.6	31812.8	27205.2	24182	20726.4	20996.1	18277.4	18369	17536.6							367.6	21439.8	6348.45	2274.97	44.752
	367.8	31523.4	27010.3	23941.7	20471.2	20877.9	18053.9	18190	17451.2							367.8	21244.5	6322.81	2229.61	43.5
	368	31232	26668.7	23747.2	20328.5	20587	17919	17983.3	17266.4							368	21082.3	6275.6	2206.61	42.198
	368.2	30876.4	26409.1	23474.7	20090.3	20359.1	17734.5	17774.2	17109.5							368.2	20838.4	6194.44	2193.76	41.402
	368.4	30598.1	26211.8	23270.1	19970.4	20273.9	17569.2	17611.5	16932							368.4	20647	6150.96	2173.07	46.548
	368.6	30422.2	25983.9	23160.3	19833.2	20020.8	17425	17423.7	16800.6							368.6	20551.2	6101.64	2179	42.16
	368.8	30172.6	25800.5	22939.7	19658.8	19988.2	17355.8	17378.9	16651							368.8	20339.8	6054.71	2134.64	39.16
	369	29912	25596	22724.1	19465.6	19801.3	17179.5	17202.6	16512.4							369	20149.6	6018.74	2134.99	41.518
	369.2	29705	25356.1	22553	19371.5	19632.6	17037.5	17037.4	16440.4							369.2	20060.5	5933.21	2116.2	40.514
	369.4	29471.1	25210.3	22335.7	19199.4	19397.8	16859.2	17030.7	16298.6							369.4	19905.8	5919.32	2107.25	40.554
	369.6	29213	24974.7	22215	18980.6	19293.2	16767.8	16800.1	16183.7							369.6	19686.5	5853.77	2070.65	40.297
	369.8	28875.4	24714.6	21961.5	18829	19093.1	16582.7	16623.5	16030.2							369.8	19535.6	5788.45	2058.1	42.408
	370	28591.1	24461.6	21684.9	18602.8	18834.6	16427.1	16473.9	15783							370	19350.9	5720.46	2038.01	39.268
	370.2	28270.6	24160.8	21449.9	18426.9	18683.2	16206.4	16258.8	15664.5							370.2	19082.9	5672.37	2015.16	39.48
	370.4	27982.3	23942	21259.9	18215	18463.8	16012.6	16076.5	15512.6							370.4	18893	5593.1	1986.97	37.635
	370.6	27643.5	23645.1	21003.6	18039.9	18262	15894.9	15991.8	15328							370.6	18701.5	5542.13	1984.82	40.807
	370.8	27297.2	23392.2	20756.2	17820.3	18094.9	15719.1	15780.4	15180							370.8	18404.5	5482.39	1955.29	40.633
	371	27050.1	23178.6	20561.9	17623.5	17867	15520.4	15587	15019.4							371	18266	5399.68	1938.48	37.563
	371.2	26788.4	22949.5	20388.6	17465.2	17731.6	15425.5	15459	14820.5							371.2	18076.8	5395.69	1897.77	34.153
	371.4	26619.8	22768.9	20227.7	17315.4	17473.2	15309	15311.1	14708.1							371.4	17926.9	5307.55	1922.45	38.324
	371.6	26370.8	22606.6	20071.2	17205.2	17388.3	15122.6	15173	14623							371.6	17841.1	5286.23	1878.88	36.719
	371.8	26127.2	22367.2	19894.8	17048.3	17286.8	14961.3	15057.7	14467							371.8	17646.1	5222.98	1865.91	35.97
	372	25923.8	22235.5	19690.2	16917.3	17093.6	14909.2	14910.4	14353.6							372	17447	5177.99	1857.71	38.843
	372.2	25701.7	22008.6	19517.7	16773.9	17024.3	14812.4	14795.3	14268.6							372.2	17426.4	5160.09	1823.78	37.361
	372.4	25445.8	21802.3	19390.4	16621.6	16880.8	14697.4	14683.5	14087.2							372.4	17229.5	5079.01	1842.88	36.333
	372.6	25262.1	21608.9	19181.3	16445.8	16686	14509.4	14538.3	13984.9							372.6	17032.8	5037.42	1835.93	37.914
	372.8	24971.8	21390.2	19015.7	16290.5	16480.4	14382	14450.3	13822.7							372.8	16843.6	4944.65	1808.79	37.545
	373	24719.3	21214.4	18784.9	16126.3	16305.3	14246.2	14315.1	13713.2							373	16683.5	4936	1783	37.56
	373.2	24462.7	20956	18609	15987.5	16215.8	14067.4	14104.3	13577.6							373.2	16517.1	4875.91	1774.01	33.845
	373.4	24193.2	20725.1	18422.7	15812.9	16011.2	13938	13988	13416.4							373.4	16326.5	4806.58	1747.24	36.82
	373.6	23904.2	20449	18165	15597.5	15732.8	13732.9	13795	13234.4							373.6	16130.7	4769.95	1705.16	34.16
	373.8	23644.4	20268.5	17995.5	15379.4	15655.6	13569.8	13618	13134.4							373.8	15911.6	4717.07	1713.8	36.4
	374	23408.4	20065.5	17818.2	15281.1	15444.2	13471.4	13500.7	13004							374	15752	4623.23	1700.24	34.305
	374.2	23181.3	19813.3	17602.6	15089.6	15300	13287.3	13366.8	12840.3							374.2	15619.3	4617.82	1671.96	38.123
	374.4	22931.1	19670.2	17440.5	14968.8	15192.7	13245.4	13209.1	12746.3							374.4	15503.2	4557.74	1658.69	36.04
	374.6	22748.7	19511.9	17335	14836.9	15016.5	13097	13116.4	12617.3							374.6	15409.6	4522.58	1630.48	35.321
	374.8	22583.6	19375	17227	14728.2	14957	12921.2	13022.8	12568.3							374.8	15248.3	4490.46	1624.23	32.515
	375	22416.1	19223.6	17066.7	14614.1	14800.5	12892.8	12958.9	12442.6							375	15114.7	4458.14	1639.57	32.738
	375.2	22192.9	19065.6	16930.4	14483.4	14663.9	12721.7	12802.2	12329.9							375.2	14923.6	4401.53	1620.19	32.673
	375.4	22022	18868.7	16764.6	14367.5	14576.9	12661.3	12694	12161.7							375.4	14874.1	4389.73	1586.81	33.927
	375.6	21839.8	18719.9	16631.7	14261.6	14500.7	12643.1	12603	12134.8							375.6	14743.9	4333.9	1583.77	33.678
	375.8	21632.5	18509.7	16490.6	14120.3	14348.6	12476.4	12528.3	11991.2							375.8	14617.2	4297.68	1556.75	32.406
	376	21377.2	18333.3	16289.8	13967.8	14210.4	12321.1	12283.1	11860.4							376	14441.6	4238.47	1538.92	35.239
	376.2	21105.5	18135.1	16063.3	13763.5	13947.8	12215.5	12205.5	11730.4							376.2	14268.8	4207.02	1532.15	30.297
	376.4	20887.7	17905.8	15908	13627.8	13873.3	12020.8	12044.9	11614.9							376.4	14081.2	4157.14	1517.64	33.262
	376.6	20659.4	17742.3	15741.7	13491	13701.9	11912.5	11934.7	11479.8							376.6	13939.5	4074.34	1482.34	33.006
	376.8	20452.4	17502.8	15550.2	13342.6	13547.3	11751.5	11838.8	11369.7							376.8	13819.1	4068.84	1481.2	30.595
	377	20205	17269.2	15320.6	13179.1	13351.4	11683.9	11625.2	11217.7							377	13578.3	3996.96	1464.94	30.246
	377.2	19953.1	17089.8	15174.3	12974.5	13194.6	11461.4	11519.5	11073							377.2	13418.5	3973.63	1434.99	30.886
	377.4	19748.3	16903.6	15047.2	12908.7	13084.9	11367.7	11429.4	11006.9							377.4	13285.9	3919.48	1426.48	30.823
	377.6	19565.8	16812.7	14921.7	12796.5	12978.8	11273.4	11327.8	10891.8							377.6	13134.9	3903.84	1412.3	33.445
	377.8	19437.7	16684.1	14807.2	12682.4	12896.6	11170.7	11231.6	10815.9							377.8	13148.1	3853.28	1416.73	32.093
	378	19217.6	16444.7	14640.7	12539.3	12727.8	11085.4	11129.1	10678.5							378	12962.2	3806.11	1389.74	30.238
	378.2	19068.2	16364.7	14536.2	12462.5	12632.2	10977.5	11073.4	10637.9							378.2	12841.3	3782.9	1377.17	32.309
	378.4	18896.8	16230.7	14419.7	12386.1	12530.1	10926.7	10964.1	10515.1							378.4	12749.9	3779.98	1374.91	31.308
	378.6	18770	16099	14315.6	12269.6	12415.5	10860.7	10888.2	10456.9							378.6	12640.4	3700.41	1388.4	32.315
	378.8	18544.8	15890.8	14130.7	12130.2	12280	10670	10756.8	10338.2							378.8	12510.9	3665.27	1343.42	32.149
	379	18319.4	15724.8	14005.3	11994.3	12227.4	10572.3	10608.7	10216.5							379	12394.6	3682.01	1335.47	30.671
	379.2	18122.7	15558.6	13822.9	11841.7	12082.2	10456.2	10551.2	10107.4							379.2	12266.6	3587.95	1330.37	31.294
	379.4	17949.8	15416.1	13683.8	11747.1	11931.5	10328.4	10403.5	10046.5							379.4	12058.2	3583.66	1312.97	30.668
	379.6	17697.8	15224.3	13504.7	11575.1	11761.4	10237.4	10239	9897.3							379.6	12005.4	3515.61	1274.3	27.453
	379.8	17527.2	15026.9	13362.1	11474.5	11665.9	10105	10149	9785.13							379.8	11869.6	3431.42	1293.02	30.6
	380	17317.2	14886.8	13200	11350.8	11504.8	10024.1	10054.2	9671.48							380	11687.2	3426.61	1282.03	29.45
	380.2	17158.2	14703.1	13074	11208.6	11359.9	9872.47	9927.79	9547.06							380.2	11557.2	3396.99	1248.51	28.28
	380.4	16957.1	14592.4	12971.8	11108.3	11255.5	9800.43	9882.79	9504.24							380.4	11448.9	3354.43	1247.17	30.209
	380.6	16807.7	14427.5	12831.3	10969.8	11139.6	9715.19	9755.22	9385.82							380.6	11315.2	3302.45	1233.18	30.252
	380.8	16684.6	14337.6	12739.3	10893.7	11030.4	9665.89	9650.22	9316.93							380.8	11240.4	3296.1	1221.54	28.524
	381	16551.2	14203.7	12617.8	10843.8	10991.6	9573.7	9573.83	9199.53							381	11204.2	3267.09	1213.36	27.6
	381.2	16393.9	14123.3	12505.1	10711.9	10909.7	9477.36	9503.47	9184.07							381.2	11057.4	3235.72	1198.68	31.11
	381.4	16239.2	13975.3	12408.1	10625.9	10782	9395.75	9462.09	9032.15							381.4	10935.6	3201.99	1179.91	26.844
	381.6	16117.1	13843.4	12306.9	10550.1	10724.7	9288.5	9330.15	9017.84							381.6	10829.6	3194.64	1176.37	28.474
	381.8	15947	13716.3	12170.3	10431.9	10603.9	9206.67	9282.58	8943.05							381.8	10724.8	3151.94	1164.66	29.95
	382	15817.6	13584.2	12051.4	10319.2	10517.2	9147.85	9184.53	8816.08							382	10619.6	3124.18	1153.3	28.948
	382.2	15638.9	13428	11912.4	10223.3	10442	9058.85	9066.92	8766.84							382.2	10589	3095.75	1148.49	27.378
	382.4	15452.7	13260.1	11807.5	10072.9	10267.9	8969.64	8948.37	8628.39							382.4	10408.8	3050.58	1154.5	28.417
	382.6	15310.5	13113	11685.2	9993.84	10207.2	8833.6	8890.22	8560.51							382.6	10291.1	3023.91	1130.53	29.083
	382.8	15085.9	12935.2	11530.2	9873.33	10040.8	8787.74	8770.71	8436.55							382.8	10187.8	2958.43	1113.89	23.857
	383	14981.6	12827.7	11421	9773.28	9921.05	8641.3	8677.9	8376.76							383	10097.8	2939.68	1102.49	28.953
	383.2	14750.4	12652	11257.1	9699.83	9841.84	8542.58	8541.31	8267.25							383.2	9941.05	2909.75	1083.47	27.611
	383.4	14632.5	12580.2	11171	9570.06	9757.82	8456.35	8463.15	8196.7							383.4	9877.3	2887.66	1082.37	26.438
	383.6	14514.9	12484.1	11103.5	9518.43	9672.04	8406.63	8445.92	8170.91							383.6	9770.16	2859.88	1068.68	29.1
	383.8	14395	12366.2	10986.8	9462.72	9634.2	8299.96	8335.88	8041.86							383.8	9732.92	2838.94	1071.24	26.141
	384	14242.4	12251.1	10891.7	9341.64	9471.67	8309.64	8291.36	8016.12							384	9611.89	2808.75	1051.48	29.686
	384.2	14171.6	12162.6	10821	9263.54	9451.87	8238.42	8240.27	7937.57							384.2	9534.75	2783.01	1043.93	26.321
	384.4	14040.7	12063.6	10733.2	9206.98	9352.68	8135.54	8170.68	7887.24							384.4	9487.41	2742.4	1042.86	27.272
	384.6	13946.4	11973.4	10637.2	9143.58	9276.96	8066.38	8096.4	7819.58							384.6	9365.02	2741.22	1041.62	27.232
	384.8	13757.6	11815	10539.2	9029.64	9166.28	7978.85	8035.18	7716.93							384.8	9324.8	2699.77	1030.01	26.127
	385	13603	11679.5	10379.9	8912.19	9094.55	7895.24	7950.14	7619.09							385	9207.62	2653.49	1017.57	27.189
	385.2	13472.7	11553.9	10302	8825.66	9007.67	7814.2	7809.56	7541.25							385.2	9070.84	2646.77	999.989	26.113
	385.4	13312.7	11415.7	10216.6	8711.63	8900.02	7741.75	7748.25	7477.63							385.4	9015.91	2638.1	987.195	26.604
	385.6	13157.3	11328	10062.6	8637.42	8791.04	7616.88	7649.14	7388.42							385.6	8876.35	2582.64	979.787	27.881
	385.8	13003.2	11157.6	9953.46	8516.92	8622.74	7553.01	7572.35	7304.84							385.8	8750.04	2586.33	970.526	24.428
	386	12865.6	11075.7	9839.54	8452.76	8585.46	7443.22	7525.59	7209.92							386	8655.68	2515.21	956.39	27.606
	386.2	12746.2	10936.4	9734.37	8353.7	8500.89	7389	7444.74	7119.69							386.2	8571.01	2507.3	936.246	26.247
	386.4	12636.9	10868.1	9632.97	8305.03	8401.27	7331.01	7386.91	7112.23							386.4	8474.29	2499.26	943.575	26.998
	386.6	12484.2	10764.6	9559.42	8202.5	8338.38	7267.46	7262	7028.35							386.6	8397.89	2457.84	934.484	26.074
	386.8	12406.1	10651.7	9479.52	8143.15	8305.82	7181.26	7249.25	6989.63							386.8	8357.09	2434.98	921.863	26.769
	387	12334.5	10570.5	9385.83	8092	8217.77	7119.88	7193.35	6927.43							387	8308.19	2420.97	926.307	24.825
	387.2	12224.4	10494.8	9342.11	8001.78	8126.91	7092.69	7177.72	6864.36							387.2	8219.26	2383.57	916.867	25.487
	387.4	12073.8	10397.8	9252.89	7923.74	8071.59	7019.28	7043.29	6816.49							387.4	8081.35	2375.47	905.912	28.138
	387.6	11967.5	10310.5	9183.47	7866.59	7980.02	6970.13	6998.12	6741.62							387.6	8069.79	2340.28	902.445	25.872
	387.8	11869.7	10170.4	9101.76	7762.35	7900.92	6899.53	6917.96	6715.14							387.8	8033.44	2319.99	883.689	28.83
	388	11746.6	10111.9	8965.82	7709.77	7800.5	6839.31	6811.76	6596.9							388	7913.67	2295.9	883.229	28.65
	388.2	11597.8	9980.6	8882.04	7610.95	7781.41	6752.35	6765.85	6545.91							388.2	7814.81	2259.36	867.926	27.002
	388.4	11420	9849.63	8761.53	7510.12	7646.04	6693.55	6690.27	6458.35							388.4	7728.9	2250.26	851.393	25.358
	388.6	11312.8	9719.66	8658.4	7442.46	7550.77	6563.85	6622.26	6345.23							388.6	7633.22	2239.03	862.952	25.976
	388.8	11194	9649.19	8578.82	7379.16	7511.43	6513.22	6549.97	6321.86							388.8	7505.07	2199.6	842.951	25.301
	389	11073.2	9548.14	8499.2	7310.46	7393.69	6492.86	6532.51	6246.51							389	7464.33	2173.71	822.041	24.835
	389.2	10944.7	9422.3	8407.65	7198.91	7348.97	6349.11	6410.21	6175.52							389.2	7410.97	2147.91	812.13	26.544
	389.4	10840.9	9345.64	8313.95	7136.24	7296.74	6333.16	6394.87	6112.88							389.4	7328.58	2137.93	819.679	25.502
	389.6	10777	9278.52	8258.65	7067.25	7255.34	6298.9	6292.58	6075.55							389.6	7252.46	2125.07	810.663	29.305
	389.8	10697.5	9213.7	8207.76	7031.7	7180.4	6255.41	6281.28	6033.74							389.8	7212.24	2066.57	801.566	25.146
	390	10578.7	9109.03	8137.65	6974.44	7103.56	6142.8	6210.16	5972.95							390	7141.64	2076.98	795.522	26.528
	390.2	10557.2	9065.72	8059.52	6904.93	7063.22	6143.63	6163.61	5959.46							390.2	7087.07	2067.93	793.114	23.57
	390.4	10444.4	8977.12	8029.65	6883.89	7007.63	6119.51	6111.17	5901.76							390.4	7052.31	2036.07	788.739	25.124
	390.6	10399.2	8919.45	7958.05	6821.28	6989.52	6022.15	6080.78	5871.67							390.6	6953.92	2043.21	773.06	26.134
	390.8	10245.8	8812.28	7892.85	6750.27	6847.64	5996.34	5991.85	5799.16							390.8	6920.77	2004.49	781.129	24.681
	391	10159.5	8749.51	7787.02	6680.86	6833.27	5936.7	5941.43	5733.2							391	6861.57	1999.86	768.309	23.458
	391.2	10043.5	8655.82	7710.48	6644.33	6748.03	5866.07	5902.41	5664.17							391.2	6784.37	1966	760.558	24.75
	391.4	9939	8548.89	7631.33	6545.49	6698.09	5804.03	5813.87	5626.9							391.4	6669.09	1966.49	747.881	23.626
	391.6	9803.62	8412.07	7508.35	6430.74	6586.86	5732.85	5765.39	5535.26							391.6	6597.51	1923.71	725.307	27.54
	391.8	9686.59	8337.83	7444.14	6376.56	6488.95	5667.67	5706.52	5470.62							391.8	6518.81	1895.82	731.561	25.035
	392	9582.97	8264.68	7368.28	6316.03	6421.86	5590.65	5627.1	5422.15							392	6445.11	1866.66	728.025	23.781
	392.2	9481.37	8157.65	7278.67	6225.4	6344.49	5534.95	5575.2	5370.28							392.2	6373.64	1823.85	715.56	25.973
	392.4	9389.28	8069.97	7182.45	6168.03	6272.03	5494.55	5496.46	5332.09							392.4	6274.55	1842.72	705.378	22.632
	392.6	9279.63	8001.47	7102.27	6123.04	6243.25	5414.67	5433.78	5271.38							392.6	6215.32	1793.42	701.309	24.087
	392.8	9185.19	7948.42	7079.18	6074.49	6218.41	5376.37	5425.11	5188.03							392.8	6215.9	1810.72	691.113	25.653
	393	9136.89	7883.51	7004.55	6010.02	6145.85	5318.99	5400.88	5147.74							393	6135.77	1779.39	686.563	23.515
	393.2	9055.7	7818.03	6953.45	5966.75	6084.1	5293.56	5327.9	5107.45							393.2	6110.68	1780.03	683.715	23.075
	393.4	8953.79	7718.98	6888.98	5915.23	5988.29	5262.68	5285.8	5046.65							393.4	6035.71	1739.35	679.956	26.781
	393.6	8895.77	7657.4	6816.14	5865	5973.4	5188.03	5232.92	5083.58							393.6	5983.83	1721.56	678.281	21.523
	393.8	8796.61	7581.28	6762.93	5842.5	5927.42	5219.17	5192.85	4997.53							393.8	5955.64	1740.89	659.094	25.448
	394	8723.4	7511.65	6700.49	5754.2	5842.61	5122.15	5175.95	4976.05							394	5872.12	1707.33	657.573	25.737
	394.2	8613.73	7422.94	6597.32	5692.38	5792.89	5080.06	5114.61	4903.37							394.2	5810.88	1673.4	644.515	22.428
	394.4	8494.22	7316.7	6534.08	5607.69	5736.04	5003.32	5021.55	4861.65							394.4	5718.32	1657.64	642.732	25.532
	394.6	8410.29	7249.27	6473.88	5555.09	5679.77	4873.56	4975.75	4794.81							394.6	5686.36	1638.48	638.428	24.015
	394.8	8339.05	7173.78	6394.16	5494.73	5575.23	4896.62	4932.35	4743.9							394.8	5570.94	1608.08	644.509	24.728
	395	8212.1	7073.03	6311.12	5424.67	5552.75	4796.99	4862.56	4671.1							395	5540.52	1589.42	623.928	23.444
	395.2	8128.81	6989.68	6248.7	5369.81	5452.18	4775.9	4804.44	4586.55							395.2	5488.08	1571.13	612.276	22.857
	395.4	8062.72	6942.13	6182.23	5310.15	5385.39	4726.85	4743.95	4578.73							395.4	5407.93	1555.46	619.45	24.8
	395.6	7968.14	6854.73	6124.68	5280.49	5382.11	4682.73	4696.48	4560.34							395.6	5382.94	1529.96	607.294	23.352
	395.8	7895.78	6806.02	6068.03	5229.64	5320.04	4658.32	4660.71	4522.49							395.8	5333.48	1540.91	612.55	22.899
	396	7825.64	6764.48	6028.2	5185.28	5284.52	4580.39	4652.11	4470.02							396	5266.8	1516.94	597.62	26.611
	396.2	7792	6689.31	5978.13	5130.4	5243.91	4535.15	4604.67	4432.92							396.2	5237.12	1500.03	600.307	22.51
	396.4	7701.79	6649.49	5930.66	5105.39	5178.3	4556.74	4553.15	4384.98							396.4	5211.97	1506.64	592.416	23.541
	396.6	7645.59	6594.96	5897.62	5065.35	5136.22	4483.14	4528.17	4360.25							396.6	5138.5	1478.85	570.712	24.451
	396.8	7585.45	6523.25	5833.62	5001.37	5118.71	4465.05	4482.52	4318.34							396.8	5097.48	1480.05	576.664	24.349
	397	7483.32	6471.35	5784.9	4937.98	5059.22	4402.14	4420.64	4299.51							397	5056.48	1439.63	579.812	22.655
	397.2	7400.42	6371.92	5723.03	4911.56	5004.03	4357.49	4401.26	4276.59							397.2	5020.57	1419.54	563.667	23.892
	397.4	7350.08	6312.5	5632.85	4849.3	4947.94	4333.79	4344.04	4184.68							397.4	4952.6	1410.63	562.822	22.146
	397.6	7255.12	6242.94	5590.39	4815.94	4879.93	4271.81	4313.24	4142.42							397.6	4891.85	1407.13	551.629	25.023
	397.8	7174.5	6200.29	5530.59	4740.23	4842.57	4213.19	4263.27	4072.15							397.8	4802.62	1379.55	553.227	21.622
	398	7086.63	6110.4	5465.95	4698.63	4769.41	4189.78	4164.63	4076.89							398	4790.3	1390.1	539.039	22.719
	398.2	7022.9	6051.57	5412.71	4644.87	4755.29	4138.78	4191.88	4019.66							398.2	4735.71	1347.24	532.644	22.776
	398.4	6946.94	5992.15	5350.45	4610.52	4680.53	4108.83	4150.08	3992.12							398.4	4708.93	1345.37	532.334	24.385
	398.6	6907.97	5948.09	5309.43	4554.26	4653.99	4058.78	4088.78	3945.97							398.6	4631.24	1352.23	534.284	23.588
	398.8	6830.56	5898.78	5276.06	4544.47	4618.59	4027.92	4075.33	3943.74							398.8	4589.82	1321.31	528.888	23.221
	399	6773.52	5843.23	5240.33	4467.73	4578.52	3990.85	4036.15	3896.44							399	4570.12	1320.21	518.645	21.609
	399.2	6711.77	5801.07	5172.52	4462.3	4534.41	3983.71	3980.83	3834.13							399.2	4519.9	1308.71	516.097	23.367
	399.4	6683.14	5734.52	5146.34	4402.68	4513.55	3954.83	3958.24	3843.59							399.4	4492.86	1292.16	522.261	22.505
	399.6	6610.27	5719.09	5094.96	4373.95	4446.07	3861.47	3924.75	3798.37							399.6	4442.38	1270.97	505.367	23.596
	399.8	6551.78	5653.56	5053.31	4361.08	4431.53	3874.85	3886.82	3774.48							399.8	4420.18	1259.14	511.734	21.929
	400	6457.13	5566.12	4999.94	4291.45	4361.63	3817.98	3836.34	3740.46							400	4357.55	1248.19	490.343	24.487
	400.2	6399.12	5521.97	4951.59	4228.93	4326.29	3791.23	3820.44	3692.32							400.2	4282.1	1240.63	484.113	23.891
	400.4	6309.47	5460.53	4881.36	4189.06	4278.81	3737.05	3775.57	3635.53							400.4	4221.42	1222.78	491.959	23.731
	400.6	6258.62	5390.53	4831.28	4158.06	4254.57	3676.97	3729.39	3581.55							400.6	4204.27	1209.99	483.463	23.166
	400.8	6146.23	5325.59	4741.31	4095.81	4175.65	3632.56	3655.59	3571.85							400.8	4157.95	1191.73	473.406	23.446
	401	6090.57	5258.22	4693.79	4055.22	4175.06	3601.49	3628.35	3504.28							401	4119.74	1176.28	470.394	24.615
	401.2	6024.12	5197.43	4653.87	4006.8	4103.59	3562.45	3583.86	3498.21							401.2	4089.86	1171.02	466.212	21.198
	401.4	5955.95	5135.11	4601.36	3973.18	4053.64	3533.13	3547.09	3446.82							401.4	3971.48	1145.04	463.954	21.683
	401.6	5882.71	5098.88	4555.92	3920.57	4010.82	3516.9	3511.44	3420.64							401.6	3994.88	1134.73	458.504	22.399
	401.8	5856.11	5048.38	4506.36	3896.91	3946.04	3471.81	3513.49	3382.58							401.8	3917.41	1133.04	453.005	24.015
	402	5805.34	5009.42	4483.9	3850.59	3938.32	3449.6	3476.12	3340.08							402	3926.65	1116.08	439.269	23.866
	402.2	5734.62	4965.89	4453.43	3823.79	3911.83	3385.11	3425.58	3279.35							402.2	3869.18	1100.16	453.095	23.938
	402.4	5675.05	4902.01	4403.37	3777.76	3844.31	3362.77	3422.35	3299.3							402.4	3835.07	1090.53	434.793	23.11
	402.6	5630.76	4860.16	4339.26	3746.69	3843.06	3367.81	3372.72	3284.48							402.6	3778.84	1087.66	435.999	24.041
	402.8	5582.21	4813.5	4304.56	3701.06	3762.43	3312.32	3333.34	3230.68							402.8	3771.19	1083.77	433.207	23.895
	403	5516.46	4750.47	4269.05	3669.12	3743.12	3298.03	3311.1	3173.61							403	3682.12	1064.33	432.538	21.944
	403.2	5450.66	4701.05	4195.66	3625.42	3662.21	3252.41	3257.68	3146.86							403.2	3641.83	1049.37	429.517	21.904
	403.4	5374	4640.41	4162.73	3576.08	3660.65	3206.54	3232.4	3114.72							403.4	3621.2	1029.62	417.583	24.301
	403.6	5324.52	4586.39	4119.99	3530.57	3601.11	3188.12	3195.37	3062.76							403.6	3560.33	1024.74	423.174	21.919
	403.8	5252.89	4540.26	4051.72	3506.63	3578.58	3108.69	3161.8	3055.68							403.8	3540.23	1014.19	412.335	23.877
	404	5177.77	4473.9	4006.11	3473.26	3509.86	3102.67	3111.61	3034.76							404	3485.52	1003.88	395.616	21.777
	404.2	5127.43	4435.84	3962.1	3426.26	3488.56	3060.87	3097.38	2970.07							404.2	3466.06	982.463	384.73	25.094
	404.4	5077.47	4385.56	3929.11	3375.16	3459.7	3022.77	3058.05	2962.01							404.4	3453.62	998.335	388.39	23.576
	404.6	5031.23	4343.6	3892.57	3334.98	3407.33	2988.12	3040.28	2946.05							404.6	3419.74	960.941	385.617	21.289
	404.8	4963.54	4300.6	3860.68	3312.1	3397.08	2964.42	2999.37	2881.06							404.8	3351.45	971.875	381.506	21.357
	405	4941.95	4278.23	3814.91	3288.27	3345.93	2953.26	2977.66	2856.97							405	3313.74	948.925	370.182	23.284
	405.2	4884.2	4242.6	3788.11	3264.04	3343.12	2925.2	2949.6	2844.78							405.2	3292.75	954.123	376.074	23.229
	405.4	4857.41	4178.36	3764.01	3231.56	3280.48	2894.99	2929.84	2827.87							405.4	3261.73	923.667	371.744	23.471
	405.6	4785.69	4151.73	3719.57	3209.99	3266.53	2867.14	2901.97	2791.8							405.6	3239.85	917.293	375.823	23.457
	405.8	4755.57	4114.78	3689.1	3168.88	3209.2	2832.68	2902.03	2765.81							405.8	3188.75	906.635	364.028	23.055
	406	4718.32	4059.33	3643.99	3140.92	3214.7	2818.51	2840.29	2752.45							406	3165.37	915.967	363.703	22.599
	406.2	4633.58	4012.34	3598.28	3108.86	3168.33	2790.43	2790.85	2689.14							406.2	3127.31	892.571	358.507	24.062
	406.4	4583.02	3961.73	3555.11	3052.52	3108.02	2758.09	2765.74	2682.42							406.4	3087.38	877.022	352.538	20.866
	406.6	4548.41	3938.03	3513.01	3016.66	3061.85	2702.63	2730.16	2643.16							406.6	3057.87	865.871	359.128	20.189
	406.8	4479.85	3859.43	3472.44	2986.1	3055.53	2671.3	2703.93	2643.32							406.8	3011.92	845.749	341.202	24.609
	407	4421.93	3844.66	3425.86	2957.51	3039.43	2642.05	2706.28	2609.57							407	2953.49	850.871	344.272	20.106
	407.2	4365.24	3788.22	3371.49	2919.35	2996.11	2627.26	2647.43	2551.35							407.2	2941.81	840.664	342.911	20.349
	407.4	4306.08	3710.79	3349.2	2876.48	2932.41	2575.03	2613.39	2504.05							407.4	2906.36	829.665	334.186	23.929
	407.6	4271.76	3688.44	3311.7	2864.03	2898.04	2578.18	2593.83	2519.75							407.6	2863.19	813.99	339.073	22.391
	407.8	4235.19	3630.74	3272.42	2818.45	2883.6	2558.98	2567.81	2468.87							407.8	2828.15	823.973	329.776	19.777
	408	4160.34	3612.65	3236.16	2797.68	2841.28	2515.74	2534.36	2446.21							408	2795.04	805.638	328.219	22.546
	408.2	4122.08	3596.63	3195.7	2769.31	2823.22	2497.98	2511.82	2434.84							408.2	2776.31	789.37	318.77	23.641
	408.4	4104.15	3545.68	3187.92	2749.06	2792.74	2469.01	2466.78	2397							408.4	2756.38	795.141	317.068	25.293
	408.6	4044.8	3492.76	3157.99	2734.95	2790.76	2427.49	2490.55	2382.74							408.6	2734.1	776.527	317.205	22.192
	408.8	4013.07	3481.93	3109.62	2682.92	2746.01	2396.1	2442.22	2361.83							408.8	2704.56	771.311	312.517	20.249
	409	3961.72	3438.22	3076.45	2668.02	2727.46	2363.92	2427.95	2311.84							409	2691.23	767.987	312.629	21.222
	409.2	3904.45	3386.17	3055.49	2627.95	2703.08	2366.7	2395.62	2300.76							409.2	2632.16	751.873	306.792	21.158
	409.4	3863.74	3348.76	3004.85	2591.69	2637.42	2335.28	2369.28	2272.24							409.4	2612.31	746.837	300.198	24.354
	409.6	3818.54	3299.27	2968.3	2560.07	2629.37	2296.11	2341.83	2234.83							409.6	2564.47	726.453	302.92	22.407
	409.8	3757.95	3268.42	2936.9	2518.92	2612.86	2280.19	2307.56	2223.54							409.8	2537.03	725.914	295.554	21.833
	410	3716.35	3229.57	2898.55	2506.45	2551.57	2267.31	2280.15	2194.31							410	2509.16	709.459	291.347	20.928
	410.2	3681.17	3184.24	2858.41	2471.22	2541.38	2217.82	2246.59	2190.29							410.2	2466.39	705.749	287.543	22.151
	410.4	3628.44	3136.55	2818.37	2430.45	2515.13	2188.46	2221.57	2154.61							410.4	2449.74	691.034	283.825	19.621
	410.6	3585.2	3121.09	2797.38	2418.09	2464.12	2172.43	2215.29	2121.7							410.6	2410.51	700.414	281.262	18.759
	410.8	3549.35	3082.21	2764.72	2385.12	2412.53	2142.95	2179.1	2101.23							410.8	2426.84	683.734	282.811	22.65
	411	3525.5	3049.29	2751.77	2357.21	2436.78	2139.62	2167.12	2090.49							411	2372.92	683.17	277.917	20.269
	411.2	3476.98	3029.89	2708.45	2337.03	2401.22	2099.55	2139.03	2068.38							411.2	2357.01	672.936	275.284	20.845
	411.4	3443.45	2986.27	2699.83	2315.92	2392.66	2093.06	2123.1	2032.18							411.4	2351.95	665.397	275.598	18.378
	411.6	3428.16	2967.93	2669.14	2298.94	2366.88	2063.36	2102.55	2027.78							411.6	2305.7	646.055	273.995	20.931
	411.8	3372.15	2945.6	2642.16	2275.65	2328.17	2046.24	2083.26	1995.64							411.8	2279.2	646.679	266.642	22.918
	412	3338.87	2881.45	2596.83	2255.59	2321.02	2014.32	2048.23	1982.94							412	2255.15	640.797	264.405	20.896
	412.2	3297.88	2864.02	2574.2	2225.65	2288.25	1991.19	2040.89	1973.09							412.2	2217.98	627.185	267.979	19.432
	412.4	3254.14	2825.62	2551.01	2193.28	2253.99	1962.38	2010.97	1945.43							412.4	2180.53	626.251	254.306	18.992
	412.6	3222.14	2804.83	2518.8	2162.77	2233.12	1975.33	2011.96	1932.01							412.6	2168.79	625.12	257.009	20.021
	412.8	3168.44	2762.9	2467.8	2156.08	2200.75	1943.09	1957.22	1900.03							412.8	2140.32	603.504	254.48	19.669
	413	3126.04	2721.56	2449.05	2117.59	2174.97	1908.94	1935.44	1868.16							413	2111.03	605.765	252.327	20.369
	413.2	3100.15	2687.55	2417.4	2097.87	2144.58	1876.3	1933.65	1864.46							413.2	2093.21	606.612	245.18	20.828
	413.4	3069.78	2647.96	2395.21	2068.93	2145.85	1876.8	1903.88	1845.42							413.4	2085.27	586.529	248.832	20.1
	413.6	3020.51	2632.75	2371.98	2038.72	2089.63	1865.33	1877.7	1838.28							413.6	2042.62	582.351	245.011	19.6
	413.8	3011.77	2596.9	2334.29	2022.83	2078.98	1842.99	1856.31	1808.46							413.8	2023.34	571.356	243.977	20.673
	414	2980.24	2578.36	2334.67	2010.46	2071.33	1813.14	1849.77	1787.77							414	1989.99	582.385	239.185	19.342
	414.2	2968.03	2556.85	2306.41	1996.36	2054.49	1797.25	1833.09	1788.4							414.2	1971.54	564.401	233.579	19.465
	414.4	2905.27	2528.02	2291.84	1977.6	2031.77	1798.51	1823.54	1761.27							414.4	1943.32	560.41	231.423	21.3
	414.6	2890	2498.25	2260.67	1960.82	2008.16	1766.02	1796.72	1754.12							414.6	1961.21	558.716	229.846	19.46
	414.8	2861.3	2485.76	2234.5	1930.58	1984.46	1748.81	1792.59	1729.53							414.8	1925.51	553.047	228.885	19.327
	415	2814.29	2441.81	2218.01	1900.61	1966.05	1734.44	1754.24	1698.9							415	1909.88	533.913	223.382	19.767
	415.2	2782.51	2422.39	2172.87	1892.93	1933.02	1704.33	1732.68	1694.62							415.2	1891.58	531.746	226.098	20.191
	415.4	2749.12	2385.62	2155.67	1871.27	1913.51	1696.89	1718.77	1665.72							415.4	1851.22	527.395	224.571	19.614
	415.6	2727.21	2365.57	2115.75	1844.31	1898.33	1664.73	1698	1660.63							415.6	1832.92	513.698	221.249	19.311
	415.8	2680.6	2330.78	2094.79	1813.27	1866.28	1642.68	1676.44	1630.46							415.8	1802.09	519.806	213.312	19.801
	416	2652.02	2305.59	2070.34	1796.46	1837.22	1627.56	1650.3	1610.92							416	1800.47	503.407	216.246	20.151
	416.2	2630.52	2290	2045.48	1782.29	1831.97	1601.01	1647.24	1589.43							416.2	1783.68	501.662	210.65	20.51
	416.4	2586.08	2245.22	2027.19	1762.52	1793.17	1583.4	1626.21	1581.62							416.4	1747.95	498.131	211.021	17.458
	416.6	2565.64	2218.81	2006.17	1748.47	1777.69	1591.81	1607.39	1563.5							416.6	1711.14	475.376	211.956	19.719
	416.8	2525.28	2202.2	1984.24	1717.35	1756.41	1562.38	1594.88	1532.36							416.8	1703.47	471.459	211.607	19.1
	417	2513.08	2182.45	1976.59	1705.48	1750.33	1536.78	1574.62	1517.94							417	1678.12	481.154	204.773	18.777
	417.2	2481.02	2161.41	1951.04	1703.91	1745.98	1546.28	1580.82	1506.7							417.2	1675.78	470.848	200.721	18.361
	417.4	2451.1	2140.16	1927.96	1676.46	1707.39	1523.73	1533.15	1500.84							417.4	1635.09	470.378	202.27	20.042
	417.6	2432.53	2123.97	1911.82	1653.31	1706.2	1505.56	1524.89	1496.05							417.6	1627.9	455.017	199.904	21
	417.8	2416.63	2097.11	1896.94	1646.78	1690.23	1486.22	1513.4	1472.39							417.8	1618.38	460.041	203.747	17.897
	418	2384.18	2061.99	1871.39	1615.36	1662.99	1479.87	1506.31	1468.57							418	1592.11	456.72	200.025	19.66
	418.2	2341.26	2026.17	1846.57	1607.55	1634.8	1466.92	1481.48	1430.36							418.2	1567.57	441.435	195.842	19.068
	418.4	2307.66	2022.85	1819.66	1568.3	1616.63	1433.2	1463.32	1434.64							418.4	1553.72	442.934	193.586	19.44
	418.6	2277.58	1982.16	1807.7	1553.43	1604.42	1428.41	1449.34	1423.22							418.6	1540.88	435.666	188.074	18.563
	418.8	2258.07	1973.7	1773.33	1538.27	1593.62	1400.35	1426.9	1394.72							418.8	1504.81	436.183	192.929	20.184
	419	2234.91	1939.28	1768.31	1505.3	1544.35	1378.32	1427.61	1366.99							419	1493	425.501	186.653	17.166
	419.2	2195.42	1919.27	1723.42	1503.72	1543.4	1377.48	1406.33	1371.47							419.2	1489.37	418.72	183.328	17.941
	419.4	2189.7	1901.83	1708.32	1487.12	1533.52	1358.65	1384.75	1339.7							419.4	1448.26	408.255	176.734	19.285
	419.6	2153.61	1877.35	1690.53	1479.42	1513.11	1360.07	1377.65	1329.42							419.6	1423.59	423.625	177.125	19.589
	419.8	2122.42	1873.95	1683.29	1464.36	1512.51	1324.8	1351.82	1336.44							419.8	1440.17	399.837	180.964	20.658
	420	2117.97	1842.13	1673.82	1451.3	1485.35	1331.29	1356.89	1318.02							420	1423.96	395.305	176.236	16.692
	420.2	2091.34	1825.93	1644.06	1445.62	1457.92	1287.46	1338.37	1307.49							420.2	1401.28	393.674	172.514	18.427
	420.4	2066.73	1812.34	1639.81	1420.35	1466.82	1294.98	1324.9	1296.4							420.4	1405.37	396.251	177.903	17.498
	420.6	2062.69	1788.71	1623.03	1406.44	1468.56	1289.45	1317.45	1266.13							420.6	1372.55	389.43	173.704	18.714
	420.8	2040.25	1766.33	1612.46	1400.11	1438.66	1272.03	1308.83	1271.73							420.8	1370.77	388.495	169.739	17.338
	421	2004.59	1750.44	1574.31	1388.5	1405.2	1259.02	1298.03	1265.87							421	1345.98	377.194	167.469	16.244
	421.2	1989.81	1732.63	1562.26	1357.4	1398.06	1254.6	1274.9	1243.56							421.2	1333.84	381.187	162.703	17.364
	421.4	1955.53	1716.28	1553.6	1341.2	1393.88	1243.71	1252.26	1231.79							421.4	1311.16	376.051	164.316	16.61
	421.6	1941.77	1688.79	1536.18	1335.58	1373.2	1234.01	1236.06	1225.98							421.6	1298.49	368.686	169.073	17.459
	421.8	1919.96	1671.56	1515.68	1313.46	1347.99	1215.63	1231.12	1202.67							421.8	1272.69	363.79	164.225	15.393
	422	1871.57	1653.23	1483.7	1301.86	1338.59	1199.73	1235.83	1189.42							422	1272.68	357.764	158.199	14.751
	422.2	1866.21	1619.29	1476.57	1287.88	1320.54	1178.32	1215.21	1177.57							422.2	1238.66	350.847	162.182	16.833
	422.4	1834.5	1610.93	1447.54	1264.96	1315.4	1168.98	1200.3	1166.83							422.4	1221.03	352.682	155.022	15.266
	422.6	1821.11	1586.06	1429.29	1260.45	1296.75	1148.62	1183.94	1146.84							422.6	1198.03	342.738	160.839	16.878
	422.8	1806.41	1574.55	1421.71	1242.08	1278.59	1146.42	1179.55	1149.8							422.8	1206.94	339.725	155.772	16.343
	423	1794.57	1553.01	1404.78	1238.07	1279.71	1138.39	1163.23	1128.72							423	1195.32	340.266	152.569	16.548
	423.2	1772.02	1537.05	1397.45	1214.54	1273.9	1118.5	1159.71	1110.95							423.2	1184.85	325.673	152.716	15.179
	423.4	1746.61	1531.12	1384.53	1206.31	1250.79	1108.27	1124	1112.08							423.4	1168.35	329.109	152.82	17.358
	423.6	1744.85	1513.02	1366.02	1196.95	1224.71	1099.84	1138.04	1100.33							423.6	1160.74	326.223	149.645	17.728
	423.8	1719.7	1497.44	1368.37	1187.79	1224.85	1097.94	1124.33	1098.78							423.8	1152.46	324.621	148.396	16.383
	424	1706.09	1477.41	1330.17	1178.64	1205.39	1072.85	1121.53	1072.61							424	1146.81	330.25	146.406	16.096
	424.2	1677.49	1461.2	1314.56	1159.86	1207.62	1066.62	1107.38	1077.51							424.2	1128.6	313.014	142.736	15.334
	424.4	1645.16	1446.93	1310.66	1144.96	1174.67	1068.79	1076.16	1048.87							424.4	1112.95	314.088	148.43	14.728
	424.6	1626.98	1430.55	1295.41	1136.2	1157.97	1053.34	1081.9	1049.53							424.6	1094.94	303.361	137.863	16.803
	424.8	1618.54	1406.11	1289.78	1122.7	1160.92	1032.95	1075.5	1033.45							424.8	1079.24	303.053	134.956	15.04
	425	1595.67	1396.18	1266	1098.05	1132.37	1031.76	1052.2	1028.34							425	1065.71	299.741	137.058	13.664
	425.2	1580.13	1368.79	1251.06	1091.79	1133.35	1006.82	1044.65	1011.59							425.2	1048.25	298.384	134.864	15.292
	425.4	1555.18	1358.14	1236.09	1076.4	1103.92	994.301	1026.48	1003.6							425.4	1040.58	294.198	136.229	15.517
	425.6	1545.16	1338.15	1216.7	1069.61	1116.09	984.229	1017.89	989.665							425.6	1027.35	298.448	138.236	15.567
	425.8	1519.46	1329.56	1205.11	1054.83	1089.23	974.102	1014.61	984.921							425.8	1008.52	287.722	132.88	16.291
	426	1513.46	1318.34	1198.29	1048.43	1077.57	968.149	999.856	988.554							426	1002.64	280.717	128.644	14.729
	426.2	1498.37	1308.98	1185.04	1041.28	1071.57	959.162	993.783	977.963							426.2	995.662	282.558	129.039	17.363
	426.4	1487.56	1290.41	1177.99	1035.56	1066.2	960.622	974.903	958.606							426.4	981.305	284.077	127.945	15.579
	426.6	1456.57	1276.22	1165.63	1019.31	1047.74	942.802	976.122	962.643							426.6	980.143	278.197	128.216	14.749
	426.8	1458.36	1271.29	1162.89	1024.05	1047.75	945.967	967.686	954.933							426.8	978.541	269.1	128.839	15.647
	427	1432.87	1248.62	1143.77	1004.52	1023.82	936.568	964.181	932.557							427	959.488	275.436	126.097	14.035
	427.2	1414.58	1247.3	1120.81	985.067	1023.05	911.981	964.556	930.978							427.2	949.956	272.663	124.777	14.641
	427.4	1393.27	1226.7	1111.71	976.72	1002.75	915.075	925.98	905.03							427.4	944.769	269.631	122.543	13.05
	427.6	1378.56	1218.57	1108.06	967.839	995.69	906.479	927.432	907.36							427.6	917.542	267.068	118.34	15.882
	427.8	1374.08	1190.19	1087.08	955.588	986.145	896.11	921.437	890.73							427.8	921.31	257.524	120.566	14.734
	428	1354.32	1184.73	1079.4	942.241	975.352	890.249	917.264	899.474							428	895.303	255.298	116.188	13.484
	428.2	1331.87	1169.04	1059.96	934.852	959.51	878.005	900.706	878.97							428.2	901.313	251.211	118.114	12.611
	428.4	1325.38	1148.16	1052.5	925.598	939.07	864.921	894.139	878.098							428.4	874.8	251.563	116.552	14.455
	428.6	1303.29	1146.48	1042.22	915.621	957.23	852.08	882.301	859.33							428.6	857.114	251.369	116.099	15.291
	428.8	1295.21	1134.64	1024.37	906.913	926.751	849.551	863.32	856.52							428.8	877.946	243.256	110.721	16.279
	429	1292.88	1123.14	1024.62	895.09	921.296	833.776	872.013	846.406							429	872.989	236.908	110.355	15.719
	429.2	1272.42	1102.08	1015.7	894.303	927.261	846.624	861.486	843.02							429.2	851.805	240.673	113.026	13.828
	429.4	1253.09	1097.67	999.957	884.988	925.472	829.679	858.494	837.693							429.4	840.557	236.218	112.165	15.562
	429.6	1242.22	1096.27	988.476	874.772	894.169	821.003	851.743	838.893							429.6	830.204	234.682	116.898	15.352
	429.8	1239.61	1078.37	981.131	866.068	890.364	819.042	844.55	820.604							429.8	836.865	232.542	107.807	13.656
	430	1222.34	1066.85	975.782	863.248	884.26	804.511	839.882	815.935							430	826.661	232.093	111.919	14.092
	430.2	1197.69	1052.88	949.621	849.447	873.831	794.118	821.722	796.256							430.2	802.274	226.945	106.277	15.577
	430.4	1195.47	1040.16	943.703	837.385	876.456	792.176	808.103	790.211							430.4	798.853	228.912	109.847	16.515
	430.6	1177.35	1031.9	945.604	834.438	847.471	758.918	812.641	804.25							430.6	793.398	221.582	103.277	15.557
	430.8	1167.97	1003	928.401	817.966	846.39	765.673	799.826	780.279							430.8	776.964	214.414	103.484	13.287
	431	1145.47	1000.85	915.444	807.616	840.303	768.73	791.394	762.478							431	762.874	219.928	99.549	13.686
	431.2	1130.04	985.91	901.071	795.714	823.577	770.725	790.325	768.946							431.2	743.642	217.367	101.752	13.997
	431.4	1113.22	983.205	898.592	793.126	812.107	753.678	777.545	758.96							431.4	754.652	209.402	100.942	13.132
	431.6	1101.95	973.236	888.04	784.518	822.476	734.271	765.667	757.586							431.6	734.31	212.024	103.634	11.509
	431.8	1094.72	953.059	877.377	772.217	815.8	738.121	765.468	739.808							431.8	723.296	212.857	98.664	12.516
	432	1084.6	953.816	868.265	773.565	797.43	717.292	757.249	743.86							432	734.432	204.7	96.081	12.269
	432.2	1068.84	944.476	869.578	769.172	793.691	704.336	748.626	732.889							432.2	716.784	202.13	100.908	14.283
	432.4	1063.47	925.509	847.68	756.308	785.818	726.621	755.657	731.499							432.4	712.788	206.688	97.847	12.772
	432.6	1054.71	923.127	838.413	750.888	776.214	706.038	740.702	728.879							432.6	697.939	199.741	97.654	12.351
	432.8	1042.43	915.459	833.712	746.08	772.582	703.206	733.169	699.903							432.8	698.89	202.779	93.971	12.447
	433	1030.49	903.777	828.699	740.233	760.027	697.044	718.338	704.14							433	683.246	198.34	94.509	12.878
	433.2	1021.99	887.628	821.318	724.537	762.021	695.712	716.13	701.93							433.2	667.068	194.468	92.002	12.791
	433.4	999.751	884.802	808.878	719.592	744.115	675.827	711.005	699.881							433.4	663.958	194.407	93.182	13.791
	433.6	991.941	875.673	798.424	711.527	741.533	673.763	702.016	676.279							433.6	655.299	192.724	93.227	14.036
	433.8	978.477	860.969	784.978	700.374	725.493	655.806	694.295	672.947							433.8	657.39	185.967	90.535	12.211
	434	969.389	855.685	783.285	695.052	717.807	655.369	687.076	682.478							434	647.12	186.716	87.947	13.17
	434.2	957.388	845.062	772.331	692.283	707.19	673.4	680.188	674.168							434.2	643.06	183.155	91.226	12.209
	434.4	952.455	836.979	766.713	674.931	689.916	644.257	672.677	664.854							434.4	642.214	179.225	83.898	10.708
	434.6	942.773	824.455	753.012	676.634	693.395	640.035	674.044	655.723							434.6	615.821	182.856	87.194	11.936
	434.8	931.729	814.436	749.049	666.157	686.363	633.809	663.402	643.246							434.8	614.993	176.3	85.61	11.067
	435	922.006	814.85	747.222	661.648	681.101	634.807	659.003	644.889							435	620.835	178.641	85.259	11.803
	435.2	917.529	798.117	743.294	656.765	675.679	624.636	651.256	636.438							435.2	607.031	175.546	85.066	11.205
	435.4	909.889	791.205	737.786	653.008	681.562	626.37	647.793	640.36							435.4	607.38	177.269	83.406	12.069
	435.6	898.492	789.677	727.058	650.465	671.932	616.066	645.648	633.436							435.6	591.081	174.211	84.738	10.409
	435.8	886.686	780.704	718.266	636.272	664.332	611.236	633.199	625.151							435.8	583.587	170.186	79.697	12.613
	436	877.704	773.731	713.048	631.418	665.643	605.644	633.45	620.614							436	581.711	170.1	81.84	12.23
	436.2	868.506	762.98	708.826	625.9	643.229	586.555	621.904	623.743							436.2	573.509	164.716	81.107	10.107
	436.4	858.498	749.831	696.751	614.829	649.532	591.613	619.337	602.902							436.4	569.819	162.666	76.264	14.529
	436.6	848.844	746.081	689.155	606.32	642.338	591.284	613.85	601.929							436.6	561.304	168.718	83.356	10.37
	436.8	838.121	739.077	678.136	607.264	621.88	580.96	611.214	602.308							436.8	558.101	160.73	79.904	10.282
	437	827.85	729.148	669.335	597.916	618.763	565.537	596.922	593.784							437	539.994	161.18	77.18	10.598
	437.2	820.332	723.629	666.163	593.443	626.874	572.208	596.133	592.896							437.2	533.025	160.058	76.938	11.529
	437.4	810.413	711.308	650.752	585.787	604.069	564.771	595.904	573.328							437.4	534.486	158.902	76.848	12.011
	437.6	801.324	705.606	651.906	583.912	599.235	545.779	579.841	574.39							437.6	532.936	156.541	73.295	11.542
	437.8	792.212	696.032	646.166	573.605	583.452	548.887	577.746	564.456							437.8	534.13	150.583	72.219	10.88
	438	785.067	684.385	640.258	571.724	585.309	548.208	575.888	557.651							438	514.018	152.147	72.759	11
	438.2	776.064	683.824	631.164	562.657	581.987	540.388	572.635	561.731							438.2	513.227	154.115	70.487	12.677
	438.4	777.822	673.978	626.974	554.736	580.367	546.034	565.32	549.004							438.4	517.165	150.682	74.771	10.129
	438.6	768.969	672.285	613.937	555.019	584.713	539.385	562.454	551.796							438.6	510.349	150.128	74.257	10.619
	438.8	757.984	669.239	611.269	557.564	577.956	530.941	563.963	552.144							438.8	503.074	144.761	71.67	10.895
	439	747.692	655.333	611.13	543.968	570.273	523.181	551.405	541.904							439	488.666	145.578	66.739	11.825
	439.2	743.609	646.498	602.866	538.973	560.576	520.217	545.12	549.437							439.2	497.951	149.155	72.37	9.333
	439.4	733.641	645.303	595.848	535.758	556.011	504.583	540.027	535.139							439.4	481.524	141.698	69.41	9.689
	439.6	716.573	638.393	581.941	530.421	552.833	511.123	529.601	522.966							439.6	481.392	140.034	69.836	10.538
	439.8	718.068	623.358	575.448	526.42	545.425	498.963	526.219	528.534							439.8	466.559	141.101	66.889	11.108
	440	705.566	623.599	576.288	513.908	536.114	504.639	522.745	527.355							440	459.299	141.344	63.473	10.555
	440.2	698.417	613.596	570.8	511.439	533.28	493.027	519.496	514.174							440.2	457.922	133.613	65.576	9.151
	440.4	692.296	606.748	569.76	501.634	531.08	487.756	509.595	509.798							440.4	458.897	135.144	65.637	10.2
	440.6	686.031	602.183	560.691	500.47	522.412	489.38	515.05	505.52							440.6	450.18	134.096	65.128	8.104
	440.8	678.221	603.918	552.169	499.524	511.79	477.865	507.47	513.288							440.8	436.721	130.734	67.36	10.811
	441	665.514	593.44	546.956	489.048	505.495	483.852	508.283	501.896							441	443.599	135.012	64.601	10.085
	441.2	665.999	586.261	543.887	488.882	511.93	470.413	503.428	494.804							441.2	436.257	130.717	62.83	9.972
	441.4	660.235	584.491	537.424	487.475	507.733	466.364	491.999	492.313							441.4	425.665	128.257	64.407	10.844
	441.6	653.318	578.136	530.789	484.463	492.916	467.245	496.859	484.678							441.6	432.289	125.443	60.346	9.267
	441.8	640.122	569.436	531.743	477.591	486.59	465.07	491.563	479.871							441.8	431.054	127.223	62.688	8.745
	442	641.123	561.659	530.415	475.679	492.823	459.523	492.163	480.782							442	416.371	127.146	59.636	8.114
	442.2	630.62	558.417	518.334	469.088	482.809	464.345	484.327	483.53							442.2	408.301	121.413	60.174	9.188
	442.4	622.517	555.363	511.852	464.14	477.922	448.285	474.178	468.49							442.4	408.584	119.297	59.978	8.822
	442.6	617.345	543.608	505.003	459.538	477.926	442.436	471.463	475.21							442.6	403.012	120.103	59.826	9.632
	442.8	613.195	537.284	504.175	452.046	471.107	439.871	468.413	456.768							442.8	391.073	122.656	58.883	8.592
	443	602.286	531.717	497.437	446.39	466.863	434.442	465.307	460.392							443	390.642	116.607	59.09	8.533
	443.2	598.375	522.775	487.452	439.902	459.019	428.56	459.84	456.293							443.2	385.498	118.172	57.197	8.82
	443.4	593.083	517.095	486.107	441.142	447.025	430.613	450.763	446.235							443.4	389.27	117.307	55.924	8.242
	443.6	587.728	515.618	478.403	436.885	453.696	426.923	447.286	443.651							443.6	382.018	115.865	58.305	10.172
	443.8	578.642	513.385	474.612	427.368	445.673	420.787	446.102	435.359							443.8	380.865	115.346	57.833	8.417
	444	575.7	506.806	471.402	426.129	450.387	420.266	434.435	443.036							444	380.31	110.982	55.47	8.45
	444.2	565.042	506.353	469.733	422.653	437.857	417.889	440.075	437.739							444.2	363.845	114.274	55.772	10.033
	444.4	568.295	503.392	467.229	417.782	438.316	416.332	441.004	437.516							444.4	373.138	113.408	53.987	8.063
	444.6	556.856	498.169	460.381	412.65	430.23	413.193	432.929	435.947							444.6	369.483	111.34	54.228	9.356
	444.8	553.943	489.882	452.327	411.835	430.194	406.586	433.529	426.749							444.8	359.222	109.575	55.288	7.597
	445	548.087	489.081	447.889	407.26	429.891	397.55	424.211	422.856							445	351.591	107.989	54.124	9.082
	445.2	541.802	475.49	444.071	404.51	431.945	405.999	420.029	418.899							445.2	353.122	105.796	53.566	9.557
	445.4	534.036	470.94	445.478	394.937	421.27	393.941	423.811	421.982							445.4	348.028	103.779	56.816	8.266
	445.6	526.366	464.715	438.328	394.966	407.352	380.755	412.964	410.09							445.6	347.849	101.015	50.562	8.2
	445.8	523.441	461.363	434.735	394.627	404.206	387.041	414.704	415.179							445.8	348.445	104.238	51.049	7.605
	446	517.286	456.658	427.203	386.91	406.541	390.262	419.824	407.493							446	327.902	100.162	54.986	6.829
	446.2	508.88	455.58	418.505	385.296	394.379	378.795	396.746	400.877							446.2	331.84	100.144	50.763	7.843
	446.4	505.075	449.142	419.968	385.01	394.374	379.403	397.291	395.369							446.4	323.525	98.39	49.493	7.588
	446.6	499.991	441.533	415.977	374.407	394.519	368.577	396.045	395.378							446.6	324.199	100.592	49.176	7.358
	446.8	499.17	437.281	408.907	372.174	391.386	377.967	389.483	395.322							446.8	325.704	96.605	49.514	8.678
	447	484.999	433.559	408.074	366.963	385.794	364.707	398.255	382.457							447	323.76	100.462	50.288	8.078
	447.2	488.015	432.198	403.082	369.461	390.003	363.492	396.639	384.468							447.2	314.656	99.466	49.361	6.818
	447.4	482.685	423.675	399.284	366.558	380.267	363.388	386.244	387.479							447.4	314.372	94.768	48.905	7.358
	447.6	481.599	421.703	393.233	359.27	382.423	366.174	382.262	382.341							447.6	317.563	94.362	46.364	6.927
	447.8	475.817	423.463	392.09	360.239	373.844	353.758	378.014	379.29							447.8	307.127	97.662	49.819	8.595
	448	470.117	416.777	387.586	358.143	365.435	351.598	372.89	378.625							448	303.976	93.166	49.535	7.912
	448.2	458.078	410.548	385.626	355.713	364.319	351.812	371.382	369.428							448.2	298.561	92.572	47.217	7.179
	448.4	455.105	411.023	381.407	353.155	358.592	350.883	375.269	376.874							448.4	294.499	88.565	48.77	8.67
	448.6	450.18	402.066	379.221	348.217	354.161	343.559	364.355	373.076							448.6	291.901	92.637	44.742	8.847
	448.8	446.03	399.388	374.947	344.708	349.041	341.193	365.131	361.921							448.8	287.223	86.943	44.992	6.387
	449	440.802	393.728	372.884	344.065	334.107	335.252	348.026	358.128							449	291.06	86.928	43.451	7.615
	449.2	437.058	382.836	370.008	333.922	334.477	330.55	354.728	342.925							449.2	284.419	85.361	41.712	7.518
	449.4	433.687	383.55	365.269	338.652	326.715	329.725	351.868	346.704							449.4	279.387	86.345	46.038	7.553
	449.6	425.362	382.473	354.313	335.564	329.473	331.767	347.514	355.175							449.6	281.978	83.976	44.42	8.065
	449.8	427.445	376.364	361.544	333.651	323.121	327.646	343.921	355.712							449.8	282.448	85.63	41.027	6.508
	450	423.338	370.691	358.577	331.481	317.879	331.351	352.609	338.766							450	271.239	86.94	44.523	8.989
	450.2	415.814	370.749	351.858	325.939	319.057	323.088	343.794	334.608							450.2	271.482	81.561	41.88	6.845
	450.4	418.461	367.328	349.019	326.987	314.122	324.441	343.603	343.44							450.4	267.312	83.795	44.391	7.075
	450.6	411.715	368.165	347.534	319.39	315.85	318.593	337.052	339.457							450.6	261.736	80.807	41.189	7.08
	450.8	408.384	362.644	342.474	317.293	312.547	318.838	331.588	334.609							450.8	267.866	78.643	43.558	7.272
	451	404.119	359.122	343.529	313.962	312.498	310.059	336.639	330.923							451	270.928	80.093	39.814	6.909
	451.2	401.456	351.248	336.507	314.352	311.674	318.561	332.215	330.781							451.2	254.841	83.584	40.569	6.965
	451.4	392.545	348.589	335.063	314.629	308.813	310.196	334.178	321.811							451.4	260.776	79.285	39.943	8.948
	451.6	390.506	342.63	330.114	307.638	301.156	305.708	334.084	318.393							451.6	254.676	73.73	38.982	6.641
	451.8	386.775	341.861	326.445	307.882	298.112	304.285	323.491	320.844							451.8	250.008	75.649	39.572	6.343
	452	380.39	338.036	324.318	302.465	294.122	298.376	324.762	313.237							452	248.585	75.122	39.86	7.463
	452.2	372.418	331.221	319.788	297.358	294.569	296.002	314.969	319.23							452.2	242.802	78.099	40.345	5.037
	452.4	373.462	329.045	314.749	295.682	283.342	299.709	318.165	314.272							452.4	237.33	73.012	38.938	6.198
	452.6	368.701	328.277	315.101	294.149	287.95	291.629	312.059	308.924							452.6	241.584	75.115	34.753	7.888
	452.8	363.588	321.053	311.929	289.669	283.496	286.905	311.328	307.921							452.8	240.057	74.296	37.767	5.926
	453	360.517	325.505	311.308	289.671	285.373	286.688	307.617	304.893							453	235.656	72.025	35.765	6.661
	453.2	360.932	319.323	305.154	285.319	287.736	286.852	303.77	311.291							453.2	237.855	72.072	36.13	6.371
	453.4	355.298	315.905	304.672	285.946	281.736	289.911	308.574	297.51							453.4	235.768	71.887	39.963	4.142
	453.6	353.189	315.8	301.335	282.589	275.104	284.658	302.655	301.924							453.6	231.286	71.287	38.368	5.916
	453.8	352.991	313.109	300.221	282.691	267.856	282.825	298.252	300.988							453.8	229.198	69.678	36.141	6.544
	454	346.534	306.948	299.083	274.604	265.82	276.349	299.154	292.357							454	225.245	67.689	38.02	5.862
	454.2	343.954	304.243	295.771	271.236	269.139	276.878	287.74	288.447							454.2	223.578	70.223	34.733	4.428
	454.4	335.723	300.139	288.929	273.819	270.369	265.98	295.516	286.431							454.4	216.857	69.736	36.571	5.639
	454.6	334.633	299.716	288.907	269.482	261.737	266.409	288.438	291.962							454.6	212.907	69.408	36.386	6.003
	454.8	333.711	294.414	285.024	266.508	261.424	271.961	291.388	282.55							454.8	216.186	67.643	35.769	5.656
	455	327.752	291.124	282.991	266.214	261.059	266.907	280.815	282.911							455	212.439	65.115	34.475	5.341
	455.2	323.773	290.088	278.684	263.128	258.789	261.958	282.169	283.35							455.2	214.371	67.178	31.687	5.457
	455.4	322.717	285.228	275.43	257.791	253.185	264.59	277.087	278.237							455.4	209.084	65.968	33.631	5.329
	455.6	315.235	281.044	278.405	255.627	254.072	256.607	277.823	273							455.6	206.078	65.15	33.88	4.223
	455.8	317.228	283.685	268.384	255.659	244.187	264.058	277.827	271.934							455.8	202.86	62.569	31.813	4.789
	456	312.237	279.559	271.199	252.438	249.039	253.961	275.274	275.816							456	203.259	62.8	34.664	5.382
	456.2	310.584	273.851	268.374	251.234	242.047	257.083	268.712	279.345							456.2	201.244	60.016	31.461	4.97
	456.4	306.585	274.187	266.436	251.748	244.639	251.521	272.483	274.046							456.4	202.954	62.492	33.499	4.481
	456.6	306.009	273.894	264.688	247.84	248.016	253.803	275.931	270.15							456.6	197.335	59.78	31.166	5.072
	456.8	302.287	272.356	258.516	247.88	237.348	252.705	268.936	265.146							456.8	193.689	60.441	31.791	4.501
	457	299.858	270.024	258.276	242.679	242.168	241.932	272.716	263.904							457	191.51	60.698	31.731	5.458
	457.2	296.385	262.382	255.328	241.935	238.465	244.741	268.8	270.407							457.2	192.751	60.727	30.651	5.158
	457.4	297.186	266.869	253.353	241.352	235.185	245.296	259.103	257.534							457.4	189.187	60.269	30.212	3.479
	457.6	290.021	258.629	249.336	236.863	230.89	241.704	260.473	258.303							457.6	191.809	58.978	32.027	5.485
	457.8	289.986	260.425	252.11	235.367	233.013	240.888	257.267	258.026							457.8	186.019	57.368	27.485	4.978
	458	284.995	250.887	245.787	233.792	226.903	236.251	251.477	255.516							458	184.867	57.157	30.09	5.069
	458.2	280.049	250.197	243.615	235.342	227.037	231.052	254.033	247.252							458.2	185.146	56.6	29.852	4.233
	458.4	280.914	250.394	246.074	229.835	222.65	227.802	247.835	250.005							458.4	182.985	56.913	29.523	5.926
	458.6	275.689	245.985	240.951	226.147	222.277	233.948	249.917	246.738							458.6	181.823	57.448	32.256	3.797
	458.8	273.755	245.788	240.338	224.804	216.12	227.257	246.656	250.045							458.8	179.946	53.608	29.439	3.936
	459	275.422	243.554	237.176	226.705	218.955	227.02	248.707	244.835							459	176.378	55.175	28.862	5.967
	459.2	270.405	242.657	235.104	228.126	217.681	231.023	241.997	241.002							459.2	177.377	54.667	29.272	4.013
	459.4	269.098	243.038	237.156	221.917	213.015	232.129	245.171	243.821							459.4	178.749	54.622	26.483	4.278
	459.6	270.887	237.159	232.215	221.075	213.337	234.417	248.458	244.328							459.6	173.943	50.93	28.428	3.993
	459.8	260.857	235.357	229.461	218.396	211.614	219.816	241.413	241.878							459.8	171.379	52.315	26.484	3.479
	460	260.993	231.492	225.896	218.994	210.218	218.515	238.191	233.786							460	169.021	51.248	26.76	4.616
	460.2	257.17	235.258	226.093	213.04	205.888	216.15	237.868	238.79							460.2	168.602	54.209	27.808	3.618
	460.4	254.345	230.642	223.289	213.987	207.905	216.29	235.798	232.686							460.4	159.895	50.832	24.51	4.488
	460.6	254.526	227.288	220.692	210.657	206.837	218.668	231.07	235.402							460.6	164.04	49.837	26.659	5.472
	460.8	250.726	222.573	222.45	207.348	205.751	212.944	229.227	231.426							460.8	161.401	51.409	25.25	4.147
	461	246.351	224.084	218.709	205.432	201.886	215.976	230.328	228.555							461	162.582	49.649	26.279	4.001
	461.2	243.482	219.009	213.303	204.851	205.049	209.871	226.781	225.955							461.2	157.343	47.749	25.146	3.857
	461.4	244.381	217.905	212.793	202.838	200.307	213.425	229.358	224.283							461.4	153.698	46.161	27.129	3.112
	461.6	239.952	216.388	211.964	202.199	196.526	208.162	224.727	225.961							461.6	153.116	47.573	26.666	3.031
	461.8	241.84	216.776	211.671	201.354	197.803	208.663	223.931	227.808							461.8	155.547	47.973	23.638	3.848
	462	239.668	212.198	208.071	196.35	200.044	202.671	229.639	220.257							462	149.812	47.861	24.483	3.692
	462.2	231.481	211.738	205.753	195.224	191.602	207.785	219.834	219.904							462.2	157.311	47.806	23.893	3.481
	462.4	233.191	205.149	207.168	193.537	192.637	204.285	221.374	213.723							462.4	152.001	46.471	21.895	4.331
	462.6	232.437	208.708	202.823	195.884	192.099	199.272	215.396	216.108							462.6	148.96	47.045	24.224	2.639
	462.8	229.084	205.758	203.218	194.423	184.592	199.753	218.961	216.876							462.8	144.154	44.801	25.492	2.818
	463	224.423	204.372	200.864	191.966	190.832	196.655	215.474	217.963							463	146.823	44.052	23.373	4.462
	463.2	222.79	201.233	199.252	187.44	187.808	199.95	218.571	211.464							463.2	145.336	45.252	22.838	1.921
	463.4	222.34	199.421	195.029	186.953	179.284	188.398	201.696	209.531							463.4	143.728	47.218	23.883	2.185
	463.6	221.648	195.108	191.483	184.823	178.832	189.587	208.739	207.665							463.6	142.303	45.529	23.458	3.004
	463.8	219.268	195.379	190.536	186.051	182.875	193.885	205.234	206.293							463.8	142.002	45.747	23.959	3.514
	464	214.011	192.131	191.173	183.71	179.011	189.848	204.156	203.096							464	138.045	42.128	20.953	2.747
	464.2	212.186	194.236	187.091	181.543	180.762	190.001	207.791	199.833							464.2	136.478	43.987	22.378	3.332
	464.4	213.343	188.757	189.094	178.539	169.116	187.473	202.708	205.086							464.4	138.7	41.876	21.487	3.305
	464.6	209.652	189.826	184.589	176.735	176.353	186.784	203.153	201.351							464.6	135.339	43.601	23.339	3.956
	464.8	210.104	188.013	185.724	177.216	175.684	184.862	200.537	198.39							464.8	138.868	42.489	22.173	3.04
	465	206.082	186.911	181.702	178.639	173.87	183.202	201.572	200.429							465	133.756	41.798	23.141	2.315
	465.2	204.975	185.417	180.99	177.129	172.466	186.382	196.454	201.077							465.2	131.353	40.394	21.131	2.826
	465.4	201.068	184.541	181.592	175.119	173.51	177.172	198.411	198.951							465.4	130.721	40.571	20.688	2.188
	465.6	201.278	181.578	179.008	172.755	174.731	182.347	194.472	196.73							465.6	130.527	41.381	20.294	4.89
	465.8	198.224	181.593	178.499	172.37	166.276	179.82	193.714	193.223							465.8	128.066	42.278	22.413	4.467
	466	198.874	177.202	176.945	171.19	166.275	178.715	196.738	188.138							466	126.742	38.222	20.199	3.143
	466.2	196.288	174.626	172.876	168.254	166.232	180.873	192.395	188.997							466.2	125.275	39.448	20.87	2.309
	466.4	196.145	176.258	174.984	167.229	164.8	171.3	191.523	188.722							466.4	126.952	39.902	21.685	3.145
	466.6	193.2	177.202	169.364	168.151	168.82	173.926	192.352	186.775							466.6	125.467	37.554	19.81	2.943
	466.8	192.522	169.593	169.803	161.611	158.525	169.345	185.99	186.972							466.8	122.152	37.562	22.073	3.079
	467	184.92	169.353	167.956	158.744	157.219	166.094	187.125	187.141							467	118.231	35.729	20.21	1.997
	467.2	189.088	167.731	169.418	159.504	164.125	166.864	186.221	183.106							467.2	120.748	36.407	19.287	2.783
	467.4	183.461	167.582	166.531	161.876	152.68	172.379	185.533	186.51							467.4	117.478	37.012	19.656	2.806
	467.6	182.706	166.265	164.483	158.66	158.895	167.009	184.625	178.242							467.6	118.403	34.315	18.633	1.232
	467.8	181.337	162.186	162.391	157.864	155.091	169.929	174.216	187.493							467.8	118.639	34.463	18.178	1.217
	468	179.608	163.696	159.298	157.414	150.394	161.862	177.024	176.392							468	117.49	38.694	19.972	2.847
	468.2	177.457	159.626	160.405	156.667	151.88	166.575	175.715	180.867							468.2	116.622	35.505	19.038	2.028
	468.4	179.701	159.372	157.159	153.933	152.265	163.641	177.905	174.268							468.4	119.921	35.724	17.976	2.49
	468.6	176.275	159.292	157.952	153.086	151.88	161.967	174.928	172.738							468.6	111.75	35.214	19.1	2.769
	468.8	175.082	156.763	157.532	156.281	153.571	159.471	174.034	173.717							468.8	110.123	35.295	18.068	3.136
	469	170.622	154.607	153.432	152.127	152.191	156.012	173.721	177.544							469	111.134	35.243	18.155	2.197
	469.2	172.546	156.137	154.393	149.283	148.536	162.337	172.973	170.676							469.2	109.477	36.269	17.196	0.6
	469.4	169.885	153.42	152.23	149.559	146.777	154.803	167.911	169.566							469.4	108.972	33.627	18.214	2.648
	469.6	167.249	153.612	151.871	148.078	144.342	156.677	174.608	166.26							469.6	106.184	34.061	17.178	1.519
	469.8	164.818	151.207	149.777	146.427	143.141	152.256	164.586	172.982							469.8	103.599	33.251	16.044	1.884
	470	162.357	147.721	147.6	147.548	140.047	153.828	166.508	166.858							470	103.292	33.568	15.849	1.535
	470.2	163.222	146.4	151.366	145.774	139.452	155.282	165.635	167.031							470.2	102.086	32.926	17.973	1.663
	470.4	161.691	145.037	146.704	144.218	142.328	151.964	164.498	164.599							470.4	99.797	32.676	16.569	2.389
	470.6	160.151	145.085	147.777	140.647	138.123	146.226	161.41	164.989							470.6	102.958	32.06	15.692	1.384
	470.8	158.345	146.256	144.018	142.961	137.637	148.803	156.523	159.568							470.8	100.457	32.303	15.834	2.293
	471	157.142	142.723	142.885	142.131	137.264	147.493	163.121	163.035							471	97.358	30.478	15.841	0.948
	471.2	156.636	140.934	139.36	137.67	140.163	147.649	162.972	162.737							471.2	100.259	31.79	15.161	1.813
	471.4	156.129	141.824	141.526	136.626	136.337	141.851	161.545	155.599							471.4	99.082	31.539	15.272	1.552
	471.6	156.203	140.311	142.61	137.314	134.669	143.901	157.26	160.914							471.6	100.667	29.058	15.233	0.97
	471.8	153.824	139.28	140.154	136.109	133.109	143.913	155.696	162.723							471.8	97.757	30.085	14.842	-0.004
	472	152.501	136.351	136.555	135.53	133.124	141.677	159.875	159.614							472	96.178	27.898	13.371	-0.055
	472.2	149.035	139.807	138.218	132.928	129.339	142.744	155.451	156.828							472.2	94.726	29.547	16.184	1.765
	472.4	148.9	135.75	134.771	131.753	130.2	141.032	154.631	155.591							472.4	93.253	28.601	14.996	0.572
	472.6	146.196	133.98	132.82	130.332	129.548	134.214	150.612	152.676							472.6	91.387	29.958	15.48	0.852
	472.8	144.996	134.308	129.716	129.816	126.098	134.416	148.049	154.928							472.8	95.698	27.665	15.57	1.381
	473	143.37	130.334	131.671	129.464	127.175	142.15	146.462	148.541							473	88.363	28.795	14.143	0.933
	473.2	144.506	128.905	131.406	127.802	126.857	132.463	149.336	155.071							473.2	94.057	27.39	13.263	3.003
	473.4	140.647	130.377	128.546	125.927	126.531	135.244	147.545	152.389							473.4	91.835	28.209	12.246	0.983
	473.6	139.221	127.235	128.898	125.14	123.987	139.661	151.142	146.297							473.6	89.971	26.301	13.346	-0.458
	473.8	137.903	125.253	129.42	125.834	124.932	129.439	149.107	148.306							473.8	89.816	26.892	12.345	0.659
	474	138.992	124.416	125.523	124.701	122.121	128.335	143.896	147.692							474	90.452	25.066	13.058	0.405
	474.2	138.525	124.434	124.61	124.474	123.258	135.317	147.29	150.901							474.2	83.923	25.786	13.872	0.853
	474.4	138.599	123.522	127.2	121.784	118.697	129.908	143.195	143.425							474.4	88.282	28.212	14.933	0.038
	474.6	135.336	123.664	124.85	122.122	117.713	128.999	140.223	145.589							474.6	85.832	28.974	14.102	1.017
	474.8	136.128	124.573	120.498	120.628	116.213	128.23	141.327	144.047							474.8	83.17	27.322	14.806	0.745
	475	133.231	122.673	120.752	119.819	122.476	124.478	139.356	144.656							475	82.56	28.659	14.146	0.044
	475.2	132.369	119.23	119.873	118.939	120.603	129.334	140.219	140.308							475.2	84.393	25.952	13.304	0.152
	475.4	129.347	118.439	120.673	118.199	113.193	124.073	138.211	134.945							475.4	84.233	23.078	12.567	1.108
	475.6	128.41	118.924	119.529	116.271	115.496	129.603	134.564	137.827							475.6	81.352	26.142	13.221	-0.345
	475.8	125.211	116.328	118.021	115.539	113.061	126.152	136.743	133.123							475.8	78.806	24.472	13.013	0.708
	476	127.977	114.541	114.462	115.985	114.263	122.48	134.692	133.213							476	75.166	24.676	13.124	-1.327
	476.2	125.752	114.531	114.421	115.913	111.566	122.648	130.533	138.805							476.2	79.79	25.741	12.631	0.877
	476.4	124.052	112.834	113.035	112.97	112.304	118.78	137.583	136.526							476.4	81.876	26.024	12.04	0.171
	476.6	124.606	113.448	112.145	113.961	111.358	120.999	132.879	133.594							476.6	76.644	24.44	12.53	-0.443
	476.8	121.9	111.201	114.239	109.646	106.3	121.968	133.305	126.145							476.8	78.457	23.533	10.398	-0.001
	477	121.912	110.265	113.782	110.017	112.381	116.867	129.542	133.435							477	76.311	24.627	10.964	-1.162
	477.2	121.674	108.517	112.855	110.733	107.73	119.514	133.344	129.936							477.2	73.904	23.558	14.523	-0.763
	477.4	118.06	111.036	111.264	109.153	105.787	120.731	131.296	133.298							477.4	75.923	22.14	11.542	-0.444
	477.6	120.397	108.391	109.498	109.605	104.023	112.014	129.755	127.422							477.6	76.575	22.641	10.457	-0.492
	477.8	114.58	105.866	109.241	106.251	104.282	116.721	129.352	129.146							477.8	73.198	23.29	12.03	-0.095
	478	114.974	105.162	106.738	106.831	102.839	113.529	126.882	126.285							478	74.521	22.416	10.502	1.042
	478.2	116.614	105.77	106.343	104.554	104.899	113.531	127.504	125.332							478.2	72.822	22.978	11.359	-0.676
	478.4	113.077	102.93	105.996	107.137	103.639	115.356	126.683	125.223							478.4	74.606	23.964	10.353	-0.628
	478.6	111.248	103.267	105.754	103.202	104.758	110.606	126.649	123.433							478.6	71.078	18.812	10.177	-0.11
	478.8	114.672	105.087	106.071	102.276	103.505	110.128	123.574	124.021							478.8	71.106	23.215	11.038	-0.585
	479	111.163	104.035	102.706	103.303	97.589	108.681	123.484	124.482							479	72.312	19.643	11.99	-1.208
	479.2	107.579	99.502	99.653	101.01	101.235	107.386	120.623	119.163							479.2	66.374	20.325	10.774	-0.783
	479.4	111.058	98.717	99.85	102.937	97.956	110.048	121.523	119.876							479.4	69.6	18.757	9.375	-1.191
	479.6	108.995	99.281	100.871	100.505	97.199	109.398	121.207	118.346							479.6	69.256	21.88	10.827	0.612
	479.8	107.984	102.352	99.007	96.998	99.01	104.142	119.052	121.311							479.8	71.472	20.783	10.567	-1.355
	480	105.106	99.851	100.254	97.517	93.416	106.813	117.927	115.556							480	66.23	19.181	10.21	-0.362
	480.2	106.836	98.351	98.6	98.795	96.997	108.403	118.964	117.657							480.2	64.73	20.712	9.453	-1.3
	480.4	104.226	97.375	98.238	99.673	94.533	108.982	116.522	118.855							480.4	68.618	18.489	9.968	-1.27
	480.6	102.722	96.619	97.572	96.753	94.455	105.745	117.853	117.432							480.6	66.974	19.751	10.658	0.019
	480.8	103.783	95.127	96.397	96.29	94.806	106.643	114.035	119.816							480.8	67.663	21.237	10.666	-0.777
	481	102.042	94.288	96.452	97.068	92.958	102.082	113.193	115.664							481	62.549	19.378	9.176	-0.335
	481.2	102.077	94.513	95.118	97.555	93.3	102.597	115.66	118.325							481.2	63.046	20.17	9.543	-1.549
	481.4	103.472	91.549	94.133	94.943	88.004	105.012	114.791	114.803							481.4	60.404	19.933	9.304	-1.615
	481.6	100.639	92.429	93.533	93.142	93.311	100.624	113.783	112.745							481.6	63.308	18.053	7.424	-1.49
	481.8	98.08	90.641	91.31	93.28	90.055	103.191	112.037	112.818							481.8	63.594	20.145	8.412	-1.966
	482	100.164	91.94	90.462	92.977	92.264	100.236	111.939	110.539							482	64.249	19.148	10.983	-1.905
	482.2	97.743	88.707	95.185	91.18	88.778	95.404	107.652	110.621							482.2	59.593	18.222	9.22	-2.356
	482.4	98.166	87.238	90.681	91.425	85.824	97.149	109.667	106.402							482.4	62.102	18.32	8.475	-1.531
	482.6	96.045	87.505	91.344	88.363	87.124	98.54	108.807	105.157							482.6	58.182	17.557	8.034	-0.937
	482.8	95.797	87.73	89.169	88.429	89.16	97.226	107.433	110.525							482.8	58.866	18.131	8.316	-0.412
	483	94.624	90.227	89.143	89.395	89.13	94.288	106.571	109.936							483	59.19	18.981	7.067	-2.282
	483.2	93.89	86.86	87.231	88.155	86.627	94.49	106.97	104.899							483.2	59.408	18.156	8.541	-0.705
	483.4	93.013	85.204	87.772	88.385	86.925	94.851	105.464	104.849							483.4	55.075	17.136	8.556	-1.489
	483.6	91.304	85.535	88.49	88.361	84.975	93.851	105.08	103.511							483.6	55.779	17.788	8.31	0.018
	483.8	92.409	86.393	86.322	88.624	84.08	96.012	105.258	102.636							483.8	56.593	15.492	9.343	-0.498
	484	90.97	84.281	84.868	85.973	84.537	95.4	105.906	105.641							484	54.628	17.478	7.453	0.131
	484.2	89.461	82.538	84.882	85.706	81.71	92.07	101.359	106.222							484.2	55.245	14.68	6.673	-0.645
	484.4	88.607	80.823	87.278	87.159	84.451	93.331	102.938	104.17							484.4	59.531	14.791	7.599	-1.05
	484.6	90.239	80.393	82.545	84.425	82.5	93.412	105.891	102.465							484.6	51.807	17.125	7.619	-2.27
	484.8	86.36	80.081	83.244	84.567	85.8	89.365	100.256	101.751							484.8	54.626	13.994	7.551	-1.193
	485	86.383	77.98	82.293	83.079	82.166	91.411	100.154	101.792							485	54.223	14.158	6.178	-0.915
	485.2	85.317	80.52	80.014	81.614	80.654	88.127	104.544	99.513							485.2	50.84	14.783	7.307	-1.725
	485.4	85.122	78.117	79.058	81.885	82.19	88.639	103.192	99.769							485.4	50.35	16.108	6.686	-1.786
	485.6	85.175	79.331	79.492	80.341	79.835	84.273	96.237	97.896							485.6	53.456	15.997	7.579	0.139
	485.8	84.71	77.985	79.89	78.389	78.318	88.872	98.882	97.55							485.8	52.439	15.101	7.696	-1.192
	486	84.211	78.148	78.996	79.47	77.014	85.116	92.469	97.078							486	52.194	15.045	6.736	-1.887
	486.2	84.292	76.416	77.235	79.183	77.622	88.54	95.689	98.341							486.2	54.934	14.225	7.868	-0.941
	486.4	81.921	77.511	79.128	78.32	76.347	87.169	95.004	94.454							486.4	48.821	15.963	6.485	-1.571
	486.6	81.617	75.994	76.349	80.079	77.939	84.713	95.498	97.587							486.6	49.655	14.987	6.077	-1.514
	486.8	81.518	75.533	77.362	77.994	76.356	84.448	92.201	98.355							486.8	49.708	14.76	5.154	0.087
	487	80.553	73.497	75.049	76.171	74.72	84.701	95.36	92.206							487	49.608	15.92	5.062	-2.176
	487.2	79.865	72.462	75.927	77.281	77.221	83.911	91.704	94.309							487.2	49.015	14.486	5.151	-2.985
	487.4	78.588	75.053	75.481	77.769	72.385	80.231	91.213	92.583							487.4	48.876	13.836	4.918	-1.928
	487.6	77.147	74.901	75.633	72.872	70.591	84.348	94.52	89.064							487.6	46.859	13.052	4.568	-2.705
	487.8	76.272	73.688	75.088	75.348	72.43	82.559	92.583	91.099							487.8	47.572	13.398	5.465	-2.086
	488	78.146	70.926	73.209	74.782	74.046	84.693	90.068	90.514							488	45.618	13.138	6.147	-1.89
	488.2	77.937	70.25	72.894	72.216	74.493	82.098	90.158	85.589							488.2	45.294	14.093	4.552	-2.293
	488.4	76.367	69.152	73.419	73.651	75.076	78.289	91.403	89.452							488.4	45.088	13.677	6.461	-2.463
	488.6	75.949	69.515	71.153	71.878	72.987	79.919	90.738	91.726							488.6	42.795	12.952	5.261	-1.606
	488.8	75.097	71.508	71.308	73.711	72.076	78.306	87.138	90.561							488.8	45.679	15.624	6.125	-2.742
	489	73.598	69.048	70.858	71.578	69.104	79.041	87.927	88.294							489	48.647	12.452	5.566	-1.769
	489.2	71.785	67.33	71.503	72.151	68.772	80.513	90.067	89.116							489.2	46.392	13.849	4.024	-2.038
	489.4	71.423	67.482	70.053	73.381	68.058	82.307	85.305	89.966							489.4	47.384	12.242	5.453	-1.976
	489.6	72.663	67.635	70.438	69.342	72.065	80.773	87.07	90.871							489.6	42.747	12.897	5.131	-2.771
	489.8	72.369	67.619	70.473	70.474	65.9	75.719	85.193	91.479							489.8	41.435	11.706	5.026	-2.44
	490	71.224	65.51	66.624	70.295	65.36	76.444	86.351	89.383							490	44.022	11.925	4.308	-3.57
	490.2	70.725	66.457	68.782	69.974	64.314	75.688	85.262	88.701							490.2	44.517	12.15	4.017	-2.34
	490.4	70.369	65.675	65.952	68.339	67.651	77.559	85.356	81.143							490.4	42.913	12.071	5.224	-2.883
	490.6	69.358	64.386	66.985	67.246	66.07	72.645	80.175	84.212							490.6	40.652	13.438	4.726	-2.47
	490.8	68.793	64.341	65.513	68.132	67.873	73.245	82.921	84.915							490.8	41.619	11.032	3.642	-2.448
	491	67.442	64.509	67.309	66.363	70.238	75.469	82.151	81.443							491	40.898	11.451	2.781	-2.571
	491.2	68.831	64.965	63.962	67.166	65.839	75.466	82.926	82.5							491.2	40.894	9.726	3.405	-2.649
	491.4	67.491	63.799	63.229	65.623	66.236	71.609	80.581	82.681							491.4	40.25	11.721	5.933	-2.744
	491.6	67.867	64.265	64.024	65.282	69.516	73.092	81.08	81.537							491.6	40.445	12.025	5.443	-2.598
	491.8	67.453	62.363	64.131	67.187	63.692	70.105	81.052	81.751							491.8	42.173	8.753	4.456	-3.174
	492	67.994	62.493	65.06	65.379	63.849	71.303	79.653	82.211							492	41.197	11.62	5.526	-2.24
	492.2	66.496	60.587	63.888	64.317	64.657	72.522	78.662	79.867							492.2	40.918	10.58	3.586	-1.773
	492.4	66.809	62.506	62.532	63.577	59.191	67.827	79.846	77.889							492.4	38.78	10.878	3.532	-2.253
	492.6	63.812	61.895	63.433	62.653	63.011	69.297	81.337	80.308							492.6	39.479	11.19	4.571	-2.658
	492.8	64.625	60.233	60.946	62.819	59.7	69.108	75.524	75.805							492.8	39.282	10.792	2.813	-2.041
	493	64.731	59.346	60.833	63.154	61.927	70.344	77.86	77.869							493	39.865	9.713	4.873	-2.35
	493.2	61.976	59.307	61.901	62.384	58.376	67.783	76.433	74.949							493.2	39.181	11.793	4.716	-2.76
	493.4	62.901	61.22	60.293	63.097	58.893	70.357	74.501	80.578							493.4	36.472	8.996	3.573	-1.977
	493.6	61.684	57.956	60.346	62.389	59.744	70.711	79.126	75.819							493.6	37.51	10.112	3.635	-2.528
	493.8	61.734	56.729	59.554	61.424	59.918	67.896	76.636	75.465							493.8	36.219	10.505	3.136	-2.857
	494	61.22	59.102	58.809	59.53	59.111	70.368	72.958	76.06							494	39.107	11.009	3.054	-4.007
	494.2	60.186	57.064	61.329	61.684	59.621	68.329	71.214	73.778							494.2	34.885	10.595	5.526	-2.273
	494.4	59.682	58.021	57.842	59.048	58.95	68.716	74.187	74.799							494.4	34.955	9.186	2.575	-2.792
	494.6	59.88	56.674	56.546	59.886	59.704	66.506	77.147	71.197							494.6	35.736	7.923	1.06	-2.428
	494.8	60.844	58.411	58.835	62.437	59.143	67.09	72.35	74.781							494.8	34.909	9.98	3.851	-3.35
	495	58.236	56.428	58.229	59.608	58.931	65.021	74.338	72.983							495	34.894	9.309	2.6	-3.372
	495.2	60.209	54.585	59.015	59.402	54.956	65.571	73.488	75.453							495.2	35.786	9.523	3.523	-3.593
	495.4	58.003	54.899	58.111	58.749	56.673	64.462	73.706	76.352							495.4	35.744	8.572	3.336	-3.484
	495.6	57.698	55.366	58.342	58.21	55.874	66.828	72.359	72.931							495.6	33.811	9.148	2.216	-3.594
	495.8	57.368	54.262	55.931	58.562	54.853	63.243	69.732	73.162							495.8	36.576	8.383	3.512	-2.565
	496	59.204	52.522	56.963	57.543	55.727	63.903	71.619	69.741							496	34.893	8.188	2.971	-3.16
	496.2	58.012	53.521	55.901	57.222	57.895	65.019	69.632	69.628							496.2	33.105	9.244	3.029	-3.841
	496.4	57.587	53.636	55.166	56.389	56.154	61.716	69.892	73.932							496.4	31.218	8.461	2.376	-3.313
	496.6	55.125	53.338	55.484	56.412	53.491	62.806	67.923	69.191							496.6	33.782	8.458	2.827	-3.36
	496.8	55.086	51.911	53.756	55.247	53.068	62.897	70.2	67.733							496.8	33.825	8.789	2.499	-3.88
	497	55.679	49.493	53.628	56.054	53.184	60.468	69.713	68.683							497	31.956	7.833	2.579	-3.604
	497.2	54.518	51.905	54.307	56.484	59.34	62.463	68.884	69.329							497.2	32.949	8.282	1.873	-2.841
	497.4	52.358	50.227	51.7	57.187	55.01	61.8	64.979	65.28							497.4	34.313	8.556	3.023	-3.224
	497.6	53.661	52.516	52.52	53.88	56.906	61.882	72.093	69.171							497.6	29.931	6.531	1.856	-4.29
	497.8	53.278	50.401	52.106	54.694	52.749	61.325	67.493	69.586							497.8	31.467	7.823	2.518	-3.616
	498	53.937	50.098	51.78	55.525	53.79	60.488	61.691	65.94							498	32.382	8.707	3.263	-3.659
	498.2	53.4	49.049	53	53.53	51.262	57.603	67.326	68.266							498.2	32.099	7.016	2.741	-4.021
	498.4	52.969	49.457	51.826	54.946	51.202	60.981	65.618	67.985							498.4	32.059	8.124	2.147	-3.687
	498.6	52.208	47.203	51.197	52.74	55.601	59.157	68.222	67.101							498.6	32.125	9.481	1.893	-3.36
	498.8	51.245	51.478	51.507	53.245	49.021	58.531	66.11	65.684							498.8	30.015	5.84	2.435	-3.524
	499	50.505	48.753	50.921	52.862	54.299	56.559	66.882	63.995							499	29.616	9.601	2.301	-3.26
	499.2	50.63	47.065	50.524	52.81	50.248	55.515	64.914	65.15							499.2	28.313	8.376	2.435	-4.383
	499.4	49.684	48.122	50.936	51.297	48.655	55.616	67.854	63.595							499.4	28.567	5.662	1.455	-3.766
	499.6	49.912	48.663	49.114	51.357	51.984	59.093	64.991	63.598							499.6	31.967	6.333	2.683	-4.223
	499.8	50.485	47.405	49.438	53.375	47.389	56.037	64.699	65.628							499.8	29.514	7.194	2.196	-3.65
	500	50.836	46.75	48.57	51.476	52.385	58.05	63.62	65.63							500	29.837	7.305	2.564	-4.205
	500.2	50.481	46.296	47.152	50.201	49.44	55.354	64.753	65.127							500.2	28.668	8.852	2.342	-3.491
	500.4	48.894	47.385	47.698	50.398	51.057	56.176	62.887	63.142							500.4	30.99	6.754	1.674	-3.616
	500.6	48.899	46.682	47.379	49.919	49.989	55.618	59.776	65.774							500.6	28.973	8.672	1.653	-4.359
	500.8	50.706	45.05	46.446	50.364	49.259	55.534	62.763	64.293							500.8	27.947	6.31	0.794	-4.039
	501	47.928	45.449	47.665	49.383	50.069	54.371	61.772	63.942							501	27.312	9.021	3.834	-3.59
	501.2	48.273	46.147	47.754	51.03	49.641	56.432	64.359	58.267							501.2	27.575	6.325	0.942	-4.305
	501.4	47.645	46.27	46.691	48.131	50.88	56.394	63.061	60.779							501.4	26.354	6.615	0.231	-2.901
	501.6	45.88	46.736	48.337	48.774	45.911	53.589	63.85	59.19							501.6	30.4	6.293	1.326	-4.324
	501.8	46.727	45.241	47.16	49.618	47.633	57.07	61.276	59.641							501.8	30.445	5.343	0.615	-4.177
	502	45.268	44.995	48.026	48.861	47.722	52.438	58.065	59.264							502	27.52	6.377	1.434	-3.544
	502.2	45.562	45.14	44.131	46.654	45.048	52.82	59.484	61.463							502.2	26.426	6.075	1.861	-3.789
	502.4	46.138	43.137	45.156	47.308	43.867	54.854	59.362	60.906							502.4	26.898	5.702	-0.119	-3.756
	502.6	46.488	45.504	46.023	47.751	44.546	52.681	58.742	59.189							502.6	27.138	5.673	2.43	-5.001
	502.8	45.127	42.665	44.565	47.673	45.52	53.156	59.206	61.347							502.8	26.919	7.362	0.59	-4.536
	503	44.741	43.386	45.197	48.28	48.758	50.242	55.042	60.26							503	26.033	5.591	0.167	-3.5
	503.2	43.873	42.374	43.521	46.468	44.646	51.015	60.318	59.734							503.2	25.605	5.84	0.769	-3.977
	503.4	45.276	41.909	45.045	46.591	42.788	50.24	58.683	58.609							503.4	25.34	6.95	0.389	-3.591
	503.6	44.886	43.089	44.669	45.465	44.063	51.893	59.212	60.795							503.6	27.244	5.248	2.435	-4.288
	503.8	44.446	43.358	43.604	47.998	43.942	52.112	55.638	57.525							503.8	23.765	6.299	0.704	-4.115
	504	43.436	42.724	43.242	45.389	45.194	52.704	56.013	55.409							504	24.86	5.514	-0.395	-4.592
	504.2	43.396	39.96	42.905	45.389	42.535	48.394	57.882	55.905							504.2	25.066	5.15	0.749	-5.134
	504.4	44.677	42.396	44.118	44.4	43.431	51.665	55.82	56.861							504.4	27.105	4.892	0.229	-4.258
	504.6	42.873	41.917	43.522	44.263	44.042	54.27	54.731	55.005							504.6	27.17	7.402	-0.404	-5.066
	504.8	42.866	40.572	42.457	44.571	41.31	49.784	57.614	57.924							504.8	24.808	4.8	-0.599	-4.863
	505	42.498	39.877	41.986	44.04	44.468	51.032	54.389	55.873							505	23.807	4.915	1.392	-3.958
	505.2	42.12	39.948	40.309	44.396	43.307	51.491	54.806	56.08							505.2	24.091	4.537	2.589	-4.153
	505.4	42.17	41.491	41.398	44.553	43.104	48.332	53.415	54.741							505.4	22.755	5.274	0.357	-4.038
	505.6	40.519	40.418	41.618	43.58	40.239	48.843	53.053	54.481							505.6	23.86	4.502	-0.072	-4.402
	505.8	42.019	39.093	40.47	41.834	42.974	45.091	53.774	52.21							505.8	23.892	5.192	-0.646	-4.789
	506	41.629	40.646	40.635	43.355	42.955	49.552	53.979	51.86							506	25.2	5.449	0.375	-4.936
	506.2	41.158	39.229	40.836	43.446	41.955	46.729	51.613	52.99							506.2	22.851	4.459	0.068	-5.209
	506.4	40.016	39.175	40.655	42.939	41.046	46.914	54.235	55.568							506.4	23.688	4.644	1.643	-4.661
	506.6	40.984	38.231	40.058	40.74	42.157	47.245	49.617	54.205							506.6	22.781	4.482	0.881	-5.112
	506.8	39.192	38.174	39.488	40.404	41.215	46.442	53.996	51.287							506.8	21.076	3.657	1.475	-4.897
	507	40.061	38.636	39.761	43.824	39.353	46.891	51.483	52.281							507	23.34	5.472	0.174	-4.772
	507.2	39.569	37.96	39.512	42.458	39.945	47.906	52.862	52.735							507.2	22.308	4.959	0.492	-5.177
	507.4	39.489	38.784	38.567	41.972	39.264	47.706	51.956	55.524							507.4	22.287	3.82	-0.781	-4.694
	507.6	40.917	38.274	39.261	39.801	40.825	44.56	51.419	53.577							507.6	23.846	5.553	1.06	-4.5
	507.8	40.607	37.874	39.182	40.848	37.122	46.202	52.055	47.421							507.8	20.589	5.319	-0.563	-5.549
	508	40.239	37.712	37.406	40.58	38.404	43.676	52.591	50.546							508	20.67	4.451	-0.716	-5.725
	508.2	37.8	36.787	39.686	39.031	38.924	46.134	49.442	55.354							508.2	23.395	5.561	-0.073	-5.412
	508.4	38.355	37.649	37.597	40.706	36.109	47.495	48.321	52.005							508.4	21.108	3.615	-1.087	-4.531
	508.6	38.669	35.239	38.193	39.073	39.943	44.912	50.979	49.643							508.6	23.866	3.105	0.485	-5.07
	508.8	37.906	35.528	36.956	38.66	36.43	42.614	48.105	50.211							508.8	22.796	3.637	-0.535	-5.634
	509	37.803	37.621	37.72	38.047	38.282	44.596	47.307	51.48							509	23.384	4.82	0.432	-4.699
	509.2	38.037	35.858	38.403	37.818	37.157	43.529	47.611	49.699							509.2	20.636	2.862	-1.434	-5.888
	509.4	35.972	35.852	38.107	39.055	36.707	43.709	48.606	48.895							509.4	21.404	4.328	-1.584	-5.95
	509.6	37.654	34.593	36.985	38.912	37.228	43.211	48.942	48.148							509.6	21.789	6.792	-0.526	-4.816
	509.8	35.691	35.679	36.331	38.12	36.684	42.836	46.268	50.349							509.8	21.167	3.087	-0.798	-5.841
	510	36.664	35.858	35.677	37.176	35.95	44.252	47.897	50.274							510	20.512	2.429	-1.418	-4.301
	510.2	35.9	34.439	36.304	38.273	34.894	43.884	48.646	46.13							510.2	20.857	3.661	-0.81	-5.499
	510.4	35.717	36.499	36.538	37.475	39.454	41.185	48.365	47.791							510.4	22.206	4.104	-0.487	-4.497
	510.6	34.514	34.897	35.087	36.543	37.044	43.806	45.673	47.018							510.6	19.632	2.826	-0.338	-4.756
	510.8	34.945	34.342	35.634	37.635	37.834	44.834	47.625	49.025							510.8	20.02	3.568	-1.427	-5.256
	511	35.701	33.72	35.417	37.335	36.772	39.961	48.952	47.996							511	21.576	2.686	-0.525	-5.524
	511.2	36.316	33.79	35.444	36.454	35.584	40.467	44.712	47.124							511.2	19.827	3.95	-1.329	-6.233
	511.4	34.795	33.139	35.006	36.906	35.222	43.77	45.871	45.191							511.4	21.851	4.35	-1.583	-4.83
	511.6	35.149	35.137	35.194	37.3	36.277	40.487	45.892	42.551							511.6	21.671	2.48	0.078	-4.909
	511.8	35.296	33.213	35.208	34.701	36.626	40.801	46.579	45.51							511.8	20.263	2.222	-0.051	-4.877
	512	34.662	32.796	35.472	37.081	33.875	40.2	45.782	43.226							512	18.716	1.839	-0.564	-5.886
	512.2	35.368	33.285	34.06	37.889	34.568	40.242	45.919	46.629							512.2	18.41	4.129	0.129	-5.859
	512.4	33.687	33.002	32.901	35.803	34.686	39.842	43.813	48.259							512.4	19.21	3.243	-0.836	-5.079
	512.6	33.458	32.727	33.011	36.132	35.866	40.62	47.325	47.444							512.6	17.119	3.33	-0.187	-5.176
	512.8	34.17	31.708	34.885	36.221	32.846	39.955	43.136	46.324							512.8	22.128	2.403	-1.382	-4.872
	513	33.577	32.531	32.409	34.863	34.42	40.909	44.175	47.896							513	17.042	2.628	0.745	-5.678
	513.2	32.93	32.792	32.978	34.938	33.305	39.3	45.825	44.417							513.2	18.482	1.992	-0.988	-4.296
	513.4	33.828	33.369	34.233	35.135	34.592	39.513	44.22	46.285							513.4	19.012	2.413	-1.552	-4.206
	513.6	32.467	31.447	33.685	34.217	34.98	39.29	42.949	45.957							513.6	17.712	2.753	-1.393	-5.441
	513.8	32.828	30.792	31.415	34.374	36.194	37.09	41.864	44.029							513.8	18.782	2.402	-2.027	-5.829
	514	32.479	30.204	32.792	35.184	32.909	42.015	47.546	47.114							514	17.802	2.577	-1.939	-6.571
	514.2	31.35	31.205	31.598	33.37	35.338	36.959	44.492	42.361							514.2	17.193	1.752	-1.465	-6.728
	514.4	33.311	31.315	30.888	34.113	31.75	35.965	40.899	45.316							514.4	19.123	2.264	-1.85	-6.032
	514.6	32.855	31.191	31.769	33.201	32.38	38.423	43.779	41.751							514.6	16.651	4.009	-1.972	-5.906
	514.8	31.613	30.801	31.483	33.027	31.321	38.62	42.636	41.99							514.8	18.806	2.706	-1.345	-5.564
	515	31.73	30.887	31.88	33.004	34.392	39.023	41.543	40.483							515	18.111	0.705	-0.87	-6.305
	515.2	31.329	31.532	31.671	32.137	33.146	35.735	38.85	42.718							515.2	17.951	1.958	-0.69	-5.824
	515.4	31.514	31.097	31.122	32.568	33.529	34.726	41.729	41.726							515.4	17.023	2.722	-0.961	-6.012
	515.6	30.133	29.964	33.077	33.443	33.663	39.308	42.594	42.194							515.6	14.803	3.366	-1.173	-5.606
	515.8	31.955	30.047	30.212	33.118	31.857	37.396	41.728	43.903							515.8	17.03	2.571	-2.773	-6.103
	516	31.16	30.255	31.624	34.266	32.474	37.104	41.043	40.641							516	18.624	1.947	-1.969	-5.263
	516.2	32.705	30.047	31.39	32.068	32.994	37.164	40.678	41.363							516.2	17.211	2.506	-1.317	-5.313
	516.4	29.625	29.819	30.981	32.248	31.804	36.551	42.547	42.128							516.4	16.336	2.433	-0.621	-5.78
	516.6	30.201	30.074	31.883	31.436	31.474	38.386	38.491	40.952							516.6	16.91	2.104	-2.059	-6.367
	516.8	30.487	28.724	30.329	31.757	32.685	35.931	42.571	40.122							516.8	17.305	1.913	-2.155	-5.808
	517	30.606	28.64	29.194	31.688	32.715	35.935	37.733	40.782							517	17.341	1.625	-2.345	-5.51
	517.2	31.134	30.112	30.214	31.592	31.045	35.08	40.119	40.66							517.2	14.778	2.346	-3.499	-6.181
	517.4	30.654	29.357	29.939	31.818	32.377	34.776	39.702	38.354							517.4	15.668	2.035	-2.643	-6.46
	517.6	29.325	28.019	29.686	31.398	30.75	34.921	39.624	38.146							517.6	17.793	1.074	-3.101	-6.057
	517.8	28.751	28.391	29.342	29.523	31.067	34.93	40.396	42.203							517.8	16.773	0.88	-1.362	-5.405
	518	30.254	28.959	29.354	32.018	29.34	37.322	41.636	40.514							518	16.528	1.981	-1.892	-6.172
	518.2	30.264	28.873	29.384	31.809	30.23	38.06	44.34	39.76							518.2	16.695	3.008	-1.525	-5.596
	518.4	28.364	29.591	29.174	29.959	28.763	35.826	40.003	39.486							518.4	14.774	3.342	-2.311	-6.411
	518.6	29.066	29.093	29.655	30.016	30.518	34.444	38.046	40.217							518.6	17.333	1.401	-3.561	-6.8
	518.8	28.618	27.813	28.542	29.721	28.661	35.461	38.567	37.59							518.8	18.162	1.569	-2.208	-5.791
	519	28.599	28.225	29.772	31.571	29.638	33.559	40.713	37.712							519	16.442	0.453	-1.967	-6.384
	519.2	28.204	27.746	28.305	30.252	30.424	32.553	38.494	39.37							519.2	16.164	0.521	-2.57	-5.606
	519.4	29.273	27.962	28.413	30.523	28.192	33.731	40.951	35.403							519.4	15.981	1.286	-2.174	-6.094
	519.6	29.251	27.205	28.501	30.362	30.98	33.043	38.607	38.667							519.6	15.691	1.021	-3.292	-6.044
	519.8	27.676	29.16	28.105	29.047	29.865	33.347	38.433	38.751							519.8	16.754	-0.697	-2.368	-6.366
	520	28.407	27.709	28.503	29.911	27.978	32.06	37.43	37.364							520	14.313	1.095	-2.025	-6.451
	520.2	28.95	27.508	27.657	29.906	29.053	34.33	36.848	38.893							520.2	14.897	0.906	-3.285	-5.936
	520.4	29.325	28.7	28.773	27.266	30.896	30.528	36.92	37.489							520.4	12.989	1.726	-3.14	-6.806
	520.6	28.362	26.187	27.53	30.153	29.502	34.246	36.039	38.23							520.6	16.219	0.044	-2.517	-5.806
	520.8	28.364	27.128	27.271	28.236	28.959	33.389	36.595	37.835							520.8	14.079	0.499	-2.717	-6.3
	521	27.83	25.862	28.667	28.589	28.069	32.802	37.46	35.289							521	14.217	0.811	-3.144	-6.097
	521.2	28.376	26.18	28.447	28.521	26.764	31.23	37.96	34.708							521.2	14.55	3.263	-3.099	-6.701
	521.4	27.828	25.791	27.693	29.254	28.784	30.862	35.257	36.173							521.4	13.823	1.842	-2.889	-6.619
	521.6	27.829	26.958	28.264	29.435	29.997	33.966	35.925	35.646							521.6	16.217	1.825	-2.74	-6.942
	521.8	28.929	27.048	27.319	30.565	29.222	32.426	34.428	37.021							521.8	14.283	-0.047	-3.263	-6.392
	522	27.885	26.822	26.764	28.357	25.796	33.17	35.189	37.822							522	14.669	1.375	-1.833	-6.897
	522.2	28.316	25.988	26.84	27.912	28.667	32.758	35.026	35.564							522.2	15.84	1.111	-2.987	-6.525
	522.4	26.303	28.208	27.416	28.023	26.335	31.69	34.182	35.96							522.4	14.822	0.091	-2.951	-6.446
	522.6	27.751	27.044	27.355	27.818	26.558	30.969	35.132	36.349							522.6	13.401	1.792	-2.94	-6.903
	522.8	28.136	27.326	28.059	26.952	25.698	30.448	38.133	36.251							522.8	14.612	-1.333	-3.331	-7.206
	523	25.278	26.839	25.609	28.348	28.607	32.991	35.157	35.22							523	15.725	-0.337	-3.472	-5.972
	523.2	26.147	25.368	26.777	27.828	26.778	33.654	36.279	35.691							523.2	14.52	2.307	-3.318	-6.891
	523.4	26.062	25.493	26.195	26.468	25.939	31.162	34.398	35.933							523.4	14.071	-0.001	-2.644	-6.723
	523.6	26.629	25.914	26.525	27.65	24.607	30.743	36.966	34.151							523.6	12.306	-0.495	-3.158	-7.101
	523.8	27.107	26.021	26.614	26.854	26.703	28.982	32.695	35.792							523.8	13.966	1.033	-3.55	-6.916
	524	26.577	24.716	24.667	28.031	27.51	28.647	32.067	35.12							524	14.395	0.079	-2.557	-6.46
	524.2	26.564	25.303	25.981	27.767	27.972	30.54	32.296	34.527							524.2	12.709	0.777	-2.507	-5.899
	524.4	25.25	26.982	25.601	25.975	24.952	32.529	36.317	36.561							524.4	13.801	0.02	-3.452	-6.411
	524.6	27.5	24.376	26.307	27.028	26.028	31.118	35.811	35.868							524.6	14.993	0.585	-4.191	-6.773
	524.8	25.221	25.874	25.237	28.496	24.986	29.416	35.521	36.423							524.8	13.933	1.666	-3.765	-7.194
	525	25.397	24.853	25.382	26.692	26.962	28.887	34.121	36.333							525	14.056	-0.16	-4.397	-6.915
	525.2	25.683	25.676	25.014	27.894	23.334	32.37	36.335	32.976							525.2	14.868	0.565	-2.818	-6.605
	525.4	25.632	25.618	26.761	26.645	25.44	32.33	32.996	34.107							525.4	13.259	-0.59	-2.476	-6.959
	525.6	25.845	24.99	25.918	26.212	24.268	27.511	33.225	33.062							525.6	13.907	0.919	-2.546	-7.339
	525.8	25.253	23.757	23.52	26.467	27.294	30.685	32.961	31.598							525.8	13.909	-0.329	-2.594	-6.919
	526	24.954	25.878	25.347	25.794	24.566	29.322	32.14	32.692							526	14.469	-0.622	-4.314	-6.92
	526.2	23.721	23.892	25.511	25.9	24.875	27.484	32.225	32.674							526.2	13.521	1.131	-3.403	-7.62
	526.4	23.179	24.968	24.652	25.246	24.721	29.068	33.09	32.395							526.4	11.342	-1.117	-3.241	-6.458
	526.6	25.215	24.415	24.423	26.089	24.213	28.858	32.971	35.185							526.6	13.126	0.547	-2.094	-6.593
	526.8	25.086	24.195	24.633	26.942	25.392	30.51	29.37	32.478							526.8	13.401	0.54	-1.784	-6.987
	527	24.581	23.825	24.383	25.272	27.26	29.035	30.6	34.226							527	13.343	0.66	-4.301	-7.014
	527.2	23.944	24.194	24.324	26.706	25.573	29.965	33.481	29.944							527.2	10.76	-0.282	-3.71	-7.837
	527.4	25.95	24.959	25.059	23.567	26.623	26.201	30.159	32.687							527.4	12.347	0.071	-2.992	-6.636
	527.6	24.574	24.59	24.553	24.839	24.409	26.495	32.444	32.862							527.6	12.217	-0.462	-3.466	-6.649
	527.8	24.217	24.387	23.678	26.305	26.785	27.705	30.168	30.977							527.8	12.995	-0.237	-4.612	-7.234
	528	24.112	24.171	22.888	24.732	24.822	28.317	29.69	32.608							528	13.966	-2.036	-3.327	-7.779
	528.2	24.785	23.441	22.372	26.495	24.936	28.329	33.909	31.808							528.2	12.535	-1.623	-4.714	-6.808
	528.4	24.958	23.883	22.551	25.236	23.918	27.333	30.321	31.309							528.4	11.967	-1.064	-3.296	-7.301
	528.6	23.536	23.208	23.308	24.66	23.735	27.796	32.344	31.882							528.6	13.126	0.155	-3.783	-7.124
	528.8	23.834	22.889	21.949	25.226	25.521	27.328	29.874	31.528							528.8	11.878	-0.672	-4.105	-7.946
	529	23.316	23.866	23.67	24.501	24.085	24.746	30.25	31.091							529	13.742	0.639	-3.657	-6.502
	529.2	23.343	23.66	23.015	25.458	26.234	29.683	29.107	29.225							529.2	13.853	-0.205	-4.154	-7.583
	529.4	22.775	23.72	24.457	24.384	24.761	27.165	32.247	31.937							529.4	11.73	0.511	-3.475	-7.561
	529.6	23.983	22.661	23.158	25.204	21.605	28.052	29.574	30.151							529.6	13.637	-0.361	-2.268	-7.246
	529.8	24.097	23.4	22.816	24.233	24.283	28.954	31.391	30.766							529.8	10.15	-1.093	-3.806	-7.721
	530	24.24	23.195	24.252	24.25	23.542	28.477	32.712	30.815							530	11.123	-0.687	-4.849	-7.506
	530.2	22.65	23.1	22.931	22.868	22.103	27.184	30.419	30.433							530.2	10.598	0.543	-3.687	-7.903
	530.4	22.616	23.01	22.335	23.87	20.32	26.383	29.891	31.38							530.4	10.046	-0.297	-4.506	-6.765
	530.6	22.863	21.477	22.856	26.055	23.856	24.082	30.811	31.021							530.6	10.583	-1.303	-5.131	-7.463
	530.8	22.841	22.717	21.403	24.101	24.557	26.892	28.519	31.209							530.8	9.856	0.486	-4.186	-7.828
	531	22.931	22.302	23.709	23.883	22.035	26.388	29.402	28.73							531	12.244	-1.321	-4.34	-7.641
	531.2	21.634	21.637	22.763	23.451	23.528	27.191	26.808	30.335							531.2	9.099	-0.444	-3.599	-6.687
	531.4	22.833	21.102	21.571	24.095	22.106	28.241	29.192	31.217							531.4	11.19	-1.839	-4.582	-6.682
	531.6	20.587	22.405	21.735	25.27	22.002	26.873	29.138	30.314							531.6	11.817	-1.108	-3.486	-7.875
	531.8	21.496	23.674	23.048	23.649	22.805	24.935	29.651	27.986							531.8	11.08	0.387	-4.333	-6.444
	532	22.556	21.374	23.197	21.691	23.234	24.6	27.295	28.923							532	10.761	-0.53	-5.1	-6.835
	532.2	22.005	21.304	21.169	23.672	20.739	28.441	29.2	28.67							532.2	12.306	-1.117	-3.952	-7.161
	532.4	23.369	23.894	22.839	22.908	23.432	26.51	28.2	28.402							532.4	11.357	-0.977	-4.517	-8.008
	532.6	21.872	21.51	21.878	22.114	23.542	26.338	30.586	30.078							532.6	12.355	-1.646	-3.611	-6.651
	532.8	21.208	21.189	22.327	22.595	21.483	26.077	27.664	30.766							532.8	11.604	-1.534	-3.339	-8.038
	533	21.886	21.411	20.81	21.987	24.358	25.954	27.919	28.818							533	10.705	-0.438	-4.24	-7.324
	533.2	22.915	22.243	22.581	22.401	20.31	25.063	24.581	30.016							533.2	11.808	-1.363	-4.487	-7.682
	533.4	22.13	21.037	21.34	22.874	22.781	25.001	30.37	26.83							533.4	10.237	-0.783	-4.912	-7.32
	533.6	21.837	22.057	21.798	21.85	23.332	25.888	28.868	31.045							533.6	7.814	-0.967	-3.609	-7.831
	533.8	21.464	21.961	21.304	21.804	19.558	24.006	28.905	28.375							533.8	11.324	-1.153	-4.832	-8.312
	534	21.785	20.548	19.999	22.002	21.385	22.877	28.267	28.069							534	9.961	-2.059	-5.819	-8.056
	534.2	21.011	20.695	21.84	23.699	21.057	23.672	27.248	25.865							534.2	11.737	-3.047	-4.48	-7.966
	534.4	21.449	20.218	21.312	22.336	23.472	22.886	27.584	26.965							534.4	11.035	-0.584	-4.617	-7.376
	534.6	21.112	21.827	21.695	22.368	19.691	25.929	28.521	30.969							534.6	11.167	-1.232	-4.743	-7.403
	534.8	20.512	19.906	20.129	21.458	21.551	23.533	29.747	27.66							534.8	10.639	-2.345	-3.946	-7.972
	535	21.285	20.294	20.724	22.309	21.404	25.965	28.02	28.795							535	10.129	-2.569	-5.253	-8.294
	535.2	21.686	20.6	20.535	21.307	23.572	23.248	26.977	26.556							535.2	10.297	-1.412	-5.603	-7.044
	535.4	21.114	20.516	20.974	21.289	20.452	25.855	26.022	28.596							535.4	11.765	-2.085	-5.122	-7.845
	535.6	20.825	20.684	19.377	21.067	19.424	25.222	27.4	24.892							535.6	10.055	-0.982	-4.998	-7.799
	535.8	19.347	21.759	21.191	21.087	19.847	25.491	27.102	27.361							535.8	7.485	-2.404	-5.692	-7.912
	536	20.098	19.503	20.596	21.623	19.367	23.881	26.586	28.383							536	9.49	-0.623	-4.85	-7.348
	536.2	19.883	20.804	19.094	20.23	20.384	25.203	25.527	24.092							536.2	8.673	-1.248	-5.099	-7.743
	536.4	19.748	20.294	20.225	20.997	19.125	21.802	27.422	26.544							536.4	8.416	-1.899	-4.859	-7.964
	536.6	20.46	20.312	21.076	20.933	21.388	24.188	24.622	25.266							536.6	10.505	-0.691	-4.421	-8.476
	536.8	19.962	19.928	19.685	20.865	19.774	19.772	27.266	26.458							536.8	9.109	-1.158	-4.746	-8.011
	537	20.173	20.123	19.188	20.573	21.739	23.964	29.89	29.458							537	9.913	-1.012	-4.297	-8.523
	537.2	20.197	19.968	20.56	20.656	20.214	21.387	25.149	25.726							537.2	9.289	-0.996	-5.552	-7.982
	537.4	20.046	18.414	19.626	21.41	18.811	25.367	27.577	26.992							537.4	9.511	-2.086	-5.343	-7.292
	537.6	19.856	19.999	19.927	20.829	19.97	22.007	26.284	23.578							537.6	10.324	-1.704	-5.061	-7.769
	537.8	19.532	19.863	19.394	20.843	19.698	22.255	26.254	26.895							537.8	9.922	-1.353	-4.505	-8.329
	538	20.262	19.469	18.385	19.823	16.874	20.503	27.386	25.09							538	8.675	-1.304	-5.214	-7.551
	538.2	19.136	21.233	17.995	20.412	18.501	24.825	25.525	26.849							538.2	8.379	-1.946	-4.921	-8.394
	538.4	19.269	19.855	19.765	20.809	21.199	23.67	26.752	24.869							538.4	8.79	-2.774	-4.56	-8.458
	538.6	19.764	18.436	18.631	19.841	17.84	23.311	26.918	26.592							538.6	8.403	-1.722	-5.197	-7.673
	538.8	20.474	19.705	18.978	21.202	18.797	24.115	25.376	26.349							538.8	9.509	-2.723	-5.255	-8.709
	539	18.734	19.076	19.885	19.909	19.573	20.936	26.393	25.344							539	8.639	-1.829	-5.13	-8.442
	539.2	20.427	19.813	18.355	19.557	17.791	21.139	26.561	26.521							539.2	9.408	-0.757	-4.521	-8.147
	539.4	18.251	19.152	18.644	18.805	21.476	22.759	26.959	24.701							539.4	7.506	-1.23	-5.692	-8.288
	539.6	20.252	20.163	18.126	19.455	20.731	23.137	26.88	26.023							539.6	9.284	-2.677	-6.542	-7.365
	539.8	18.999	18.049	18.36	20.7	21.886	23.689	25.874	23.114							539.8	8.134	-1.082	-4.91	-7.12
	540	20.063	19.138	19.356	19.125	21.409	22.294	24.276	23.673							540	8.328	-2.612	-5.457	-8.178
	540.2	18.971	18.699	19.539	20.914	19.849	23.058	25.456	27.332							540.2	9.522	-2.305	-5.36	-7.819
	540.4	19.704	19.323	19.316	20.579	19.977	20.42	25.527	25.987							540.4	7.812	-0.704	-4.977	-8.293
	540.6	20.276	19.166	19.513	19.434	19.276	24.222	26.734	26.166							540.6	7.815	-1.433	-4.909	-7.559
	540.8	19.404	19.361	20.842	19.181	20.968	23.129	27.997	27.368							540.8	9.742	-1.468	-5.117	-7.863
	541	20.117	21.125	20.352	20.568	19.552	23.835	26.119	25.568							541	8.573	-0.118	-4.864	-7.587
	541.2	20.062	19.571	20.602	20.469	19.07	23.141	25.64	27.634							541.2	8.644	-0.88	-4.619	-6.77
	541.4	22.148	19.773	20.216	20.016	20.114	23.599	28.786	27.438							541.4	8.123	-1.122	-4.087	-7.873
	541.6	20.714	20.526	20.943	21.71	19.714	24.489	27.436	26.837							541.6	8.047	-1.011	-6.088	-7.465
	541.8	21.852	20.941	21.217	21.257	20.433	25.624	27.516	28.138							541.8	11.05	-0.752	-4.023	-7.253
	542	22.041	21.185	20.647	22.89	21.006	23.347	29.667	27.47							542	8.785	-0.963	-3.42	-6.507
	542.2	22.191	21.931	23.303	22.331	22.21	25.194	32.22	27.963							542.2	9.204	-0.741	-3.193	-6.63
	542.4	25.308	22.448	22.891	22.48	22.847	26.798	29.611	28.536							542.4	10.409	0.753	-2.814	-5.426
	542.6	25.421	23.977	24.166	26.02	24.205	27.333	31.695	33.099							542.6	10.59	-0.232	-1.948	-5.816
	542.8	26.095	24.394	25.139	23.855	24.142	27.099	33.814	33.644							542.8	10.783	0.504	-1.017	-5.96
	543	28.956	28.346	28.305	27.854	27.403	30.595	33.876	31.731							543	14.898	2.419	-0.406	-6.397
	543.2	31.177	29.401	28.591	29.029	26.485	29.329	36.256	33.702							543.2	12.872	4.587	-0.36	-3.503
	543.4	31.701	32.322	30.385	29.72	27.17	30.913	37.534	37.15							543.4	14.06	1.986	1.34	-3.601
	543.6	35.886	34.089	34.982	33.274	34.243	37.033	41.794	38.35							543.6	18.515	4.424	0.708	-0.91
	543.8	37.64	37.446	36.751	34.243	36.591	38.173	48.19	41.041							543.8	17.847	6.481	4.41	-0.525
	544	42.153	41.115	38.885	38.293	39.278	40.325	47.985	45.407							544	17.264	5.534	3.797	-0.519
	544.2	45.762	44.577	41.912	41.07	36.902	41.657	51.899	46.43							544.2	18.893	9.043	6.026	2.464
	544.4	49.057	44.991	44.37	43.87	41.682	48.716	52.92	52.628							544.4	21.864	9.891	5.509	2.631
	544.6	53.28	51.245	48.793	47.125	44.383	50.182	56.174	53.885							544.6	23.42	10.958	9.495	5.419
	544.8	56.142	54.249	51.475	52.248	45.938	52.577	63.175	56.357							544.8	24.51	15.668	10.67	5.237
	545	60.85	59.543	53.998	55.399	50.559	55.83	66.221	61.766							545	29.091	16.122	11.643	8.484
	545.2	67.584	65.642	59.692	56.423	58.094	61.856	71.695	68.017							545.2	30.321	18.482	17.484	10.533
	545.4	76.484	71.156	64.712	65.86	65.726	64.33	81.179	73.629							545.4	30.431	20.458	18.938	12.17
	545.6	83.968	79.568	74.27	72.937	67.043	72.953	88.016	81.678							545.6	34.258	26.252	23.708	14.333
	545.8	90.433	84.538	80.561	78.902	78.56	77.194	100.188	91.528							545.8	38.367	30.867	25.663	16.354
	546	99.547	96.844	88.823	87.393	82.508	83.853	100.437	99.505							546	45.996	32.149	29.663	21.742
	546.2	112.591	106.815	99.426	97.629	89.36	98.655	114.469	110.927							546.2	48.536	44.159	35.436	29.528
	546.4	124.56	117.567	108.144	105.713	101.746	109.72	128.137	116.872							546.4	52.579	42.332	39.605	32.417
	546.6	137.009	130.68	123.527	117.288	107.272	123.151	138.094	131.177							546.6	62.344	50.803	46.91	37.204
	546.8	150.103	141.362	130.48	128.736	121.198	131.929	152.801	138.065							546.8	66.729	55.354	52.282	39.424
	547	158.719	151.47	140.587	137.738	125.962	146.749	161.878	156.475							547	70.853	56.858	55.4	41.638
	547.2	174.486	161.916	153.437	150.689	139.997	152.749	179.311	168.995							547.2	76.623	66.252	63.495	49.594
	547.4	185.644	178.17	164.32	157.266	150.299	162.97	190.435	177.419							547.4	83.523	71.522	68.999	52.947
	547.6	197.245	191.171	176.712	171.219	158.297	177.351	205.486	183.641							547.6	94.011	76.013	71.871	61.254
	547.8	210.416	208.218	187.428	182.166	169.227	185.544	219.638	205.979							547.8	96.693	87.47	82.304	63.748
	548	224.6	218.49	202.185	195.44	182.255	199.666	232.688	218.847							548	101.471	89.072	85.438	69.957
	548.2	247.829	238.53	222.31	214.827	201.809	222.555	253.045	242.524							548.2	110.653	103.495	100.189	77.179
	548.4	268.085	261.234	245.557	235.18	221.737	245.669	286.115	265.619							548.4	120.381	117.036	103.461	85.99
	548.6	295.277	290.813	267.507	255.532	236.871	266.351	307.157	288.274							548.6	133.745	128.399	123.16	93.029
	548.8	325.417	311.635	289.99	284.448	262.059	294.039	328.702	312.229							548.8	145.857	136.412	131.49	111.127
	549	349.051	334.64	314.105	308.41	289.539	312.078	360.435	335.398							549	159.832	152.492	146.317	113.826
	549.2	384.288	367.325	343.504	325.545	305.128	349.642	397.969	369.463							549.2	172.442	175.495	162.44	128.543
	549.4	406.811	392.163	367.094	351.319	335.004	373.358	425.524	385.836							549.4	194.538	184.034	167.694	134.384
	549.6	436.03	425.66	395.025	385.342	362.391	398.873	461.913	429.46							549.6	199.107	198.817	193.036	150.591
	549.8	463.218	455.096	418.947	402.73	382.735	423.965	482.202	456.619							549.8	217.266	213.189	201.681	160.653
	550	488.444	479.901	442.636	427.846	406.208	450.351	498.645	470.149							550	225.629	226.067	212.885	173.282
	550.2	514.833	503.741	466.711	452.843	421.26	477.762	528.502	501.937							550.2	242.671	238.494	221.522	178.919
	550.4	543.447	532.726	497.574	472.278	456.037	503.018	566.839	519.967							550.4	261.349	254.215	233.013	189.715
	550.6	571.436	564.109	525.379	502.665	479.329	543.518	595.387	576.386							550.6	267.286	275.401	254.465	200.435
	550.8	602.985	598.647	549.122	526.52	512.208	573.68	625.679	585.099							550.8	285.08	286.564	260.602	220.794
	551	610.084	621.477	565.906	538.048	551.719	586.048	660.074	618.607							551	301.287	301.903	279.368	223.037
	551.2	662.814	662.269	605.769	579.956	601.196	636.476	723.733	658.657							551.2	318.017	327.177	297.013	244.402
	551.4	693.781	704.478	644.844	604.107	627.358	666.82	765.288	714.452							551.4	340.027	349.082	321.887	258.961
	551.6	750.286	755.854	687.301	659.798	662.672	729.161	806.79	779.749							551.6	364.451	386.01	335.728	284.297
	551.8	789.82	796.746	722.15	697.342	728.11	789.208	854.538	810.18							551.8	381.591	408.821	361.857	295.074
	552	833.015	837.691	766.447	728.451	757.905	822.111	907.383	878.852							552	408.671	420.721	379.344	314.118
	552.2	883.172	892.277	818.401	782.11	813.856	872.148	966.565	911.426							552.2	418.444	446.804	402.129	334.67
	552.4	926.879	929.8	861.73	813.35	862.899	902.333	1005.78	961.646							552.4	448.298	473.252	429.932	343.951
	552.6	974.696	977.605	908.901	859.928	906.817	948.958	1077.74	1025.52							552.6	484.587	506.324	446.194	362.819
	552.8	996.91	1011.84	937.316	891.933	927.552	1003.63	1122.05	1054.57							552.8	490.722	515.579	466.986	380.265
	553	1034.85	1061.74	963.064	931.13	970.259	1032.09	1143.72	1097.63							553	488.401	539.996	474.384	394.967
	553.2	1080.33	1103.19	1007.49	960.561	1003.37	1101.52	1206.74	1142.99							553.2	508.369	566.448	477.681	418.5
	553.4	1113.82	1133.61	1043.59	996.972	1030.34	1122.46	1213.7	1188.24							553.4	538.427	594.12	505.031	424.107
	553.6	1153.23	1174.38	1089.19	1025.94	1080.33	1170.38	1301.21	1227.67							553.6	553.477	606.076	532.351	444.777
	553.8	1183.69	1217.27	1127.56	1072.57	1109.24	1197.91	1320.44	1270.57							553.8	564.279	630.704	536.609	460.678
	554	1222.05	1258.31	1161.42	1113.12	1146.23	1255.17	1381.12	1311.41							554	599.393	653.194	560.171	478.957
	554.2	1298.55	1324.51	1216.04	1169.14	1223.42	1301.63	1458.87	1397.59							554.2	628.43	671.226	585.379	495.832
	554.4	1341.02	1373.49	1272.13	1208.29	1263.25	1357	1514.03	1453.31							554.4	641.098	708.719	618.853	516.651
	554.6	1402.57	1435.02	1337.97	1266.1	1335	1433.91	1579.6	1526.08							554.6	688.696	746.754	645.448	539.03
	554.8	1443.04	1479.47	1381.81	1321.28	1387.47	1486.02	1675.36	1574.06							554.8	714.834	779.88	675.026	572.385
	555	1489.82	1541.99	1428.56	1370.63	1437.98	1549.17	1704.78	1627.2							555	725.123	826.654	685.961	594.683
	555.2	1559.14	1597.34	1505.66	1435.86	1535.69	1612.67	1793.88	1708.3							555.2	766.842	843.655	723.252	619.486
	555.4	1628.44	1655.84	1557.16	1488.96	1573.07	1692.28	1868.32	1768.45							555.4	801.484	890.858	760.663	639.594
	555.6	1662.92	1710.05	1614.84	1529.77	1630.61	1751.49	1934.1	1844.22							555.6	824.972	905.391	771.177	663.539
	555.8	1699.99	1748.65	1638.51	1564.2	1687.01	1783.65	1950.78	1890.15							555.8	855.38	937.461	796.134	676.164
	556	1732.13	1791.44	1684.09	1600.68	1696.86	1827.84	2020.42	1949.51							556	869.306	964.8	800.171	692.825
	556.2	1794.57	1856.67	1729.25	1647.41	1744.17	1874.47	2059.94	1982.95							556.2	891.371	1003.04	823.235	723.153
	556.4	1816.67	1891.02	1778.9	1692.07	1779.92	1922.37	2122.8	2053.65							556.4	909.646	1010.8	852.172	739.92
	556.6	1855.94	1927.02	1810.81	1730.71	1822.71	1977.27	2174.5	2075.63							556.6	924.051	1035.38	876.467	748.43
	556.8	1906.6	1973.08	1865.11	1774.12	1862.7	2020.5	2242.09	2147.72							556.8	960.265	1058.46	897.63	761.253
	557	1947.12	2019.51	1905.35	1828.26	1924.39	2091.17	2298.79	2223.26							557	977.343	1089.98	907.468	777.85
	557.2	1995.13	2066.66	1965.18	1878.87	1979.2	2149.68	2354.33	2267.57							557.2	987.889	1137.87	937.398	792.051
	557.4	2041.41	2117.49	2005.81	1927.96	2034.01	2183.06	2428.05	2321.88							557.4	1041.82	1146.75	962.002	813.633
	557.6	2099.8	2189.78	2054.99	1982.65	2110.48	2264.52	2466.11	2395							557.6	1048.8	1186.37	956.405	845.246
	557.8	2137.8	2220.1	2097.96	2036.2	2147.89	2322.84	2538.84	2460.96							557.8	1097.16	1208.61	1006.67	869.403
	558	2185.7	2274.58	2163.11	2075.07	2204.74	2367.05	2616.8	2519.82							558	1104.57	1228.05	1027.77	875.549
	558.2	2218.87	2318.03	2190.7	2110.13	2229.84	2411.98	2634.76	2581.09							558.2	1137.98	1276.82	1048.6	898.63
	558.4	2266.84	2354.2	2254.07	2148.94	2265.48	2465.42	2688.42	2635.18							558.4	1153.55	1301.8	1069.95	907.525
	558.6	2275.49	2385.55	2267.27	2182.77	2326.64	2508.39	2743.48	2663.08							558.6	1156.88	1319.31	1068.9	935.643
	558.8	2317.83	2419.47	2316.09	2217.16	2350.3	2530.46	2767.3	2682.79							558.8	1177.92	1331.98	1090.66	945.021
	559	2349.79	2454.64	2328.24	2241.82	2382.87	2589.17	2825.74	2754.7							559	1208.95	1369.27	1095.88	934.786
	559.2	2372.84	2478.6	2367.89	2284.04	2407.34	2589.93	2851.74	2789.53							559.2	1202.04	1392.63	1107.74	963.225
	559.4	2379.31	2494.7	2390.81	2298.71	2442.05	2647.08	2867.15	2824.28							559.4	1240.87	1410.31	1136.45	962.581
	559.6	2407.15	2526.35	2403.58	2335.68	2466.77	2675.47	2933.58	2849.31							559.6	1225.67	1429.58	1137.77	981.786
	559.8	2405.81	2548.46	2436.03	2348.27	2491.48	2721.01	2962.21	2896.79							559.8	1241.83	1418.65	1130	990.113
	560	2444.99	2589.68	2472.83	2372.4	2507.48	2744.51	2993.51	2922.07							560	1239.44	1448.95	1176.24	1002.64
	560.2	2484.39	2609.94	2500.81	2399.69	2542.37	2776.64	3021.02	2957.74							560.2	1273.13	1454.37	1154.65	1017.75
	560.4	2483.13	2623.08	2510.73	2420.68	2561.95	2773.87	3059.57	2968.58							560.4	1272.67	1475.48	1175.03	1022.03
	560.6	2496.59	2641.84	2522.92	2450.45	2596.45	2828.35	3094.78	3022.77							560.6	1283.18	1493	1189.59	1032.77
	560.8	2506.88	2644.62	2535.41	2455.86	2613.49	2837.1	3080.27	3026.04							560.8	1280.33	1510.44	1172.44	1019.56
	561	2514.24	2655.33	2554.91	2465.12	2654.24	2862.42	3105.03	3079.17							561	1306.35	1502.29	1195.11	1017.8
	561.2	2513.45	2666.32	2572.03	2473.3	2662.28	2888.2	3121.82	3087.31							561.2	1298.83	1508.65	1197.83	1021.99
	561.4	2513.1	2662.41	2566.15	2500.97	2663.19	2887.51	3149.38	3083.66							561.4	1307.76	1505.04	1179.44	1040.82
	561.6	2520.4	2670.32	2566.96	2488.83	2661.47	2893.74	3153.53	3108.45							561.6	1288.89	1540.71	1174.21	1025.6
	561.8	2508.08	2665.33	2566.64	2528.38	2682.89	2918.99	3172.88	3107.33							561.8	1302.8	1514.95	1187.2	1034.37
	562	2510.58	2650.7	2565.1	2495.17	2680.83	2899.41	3142.56	3089.64							562	1325.39	1507.27	1194.29	1036.4
	562.2	2517.3	2657.99	2581.07	2488.19	2668.75	2929.04	3164.47	3121.89							562.2	1293.07	1513.05	1170.49	1019.17
	562.4	2499.42	2644.5	2585.34	2492.12	2671.9	2929.38	3144.45	3103.83							562.4	1294.77	1518.85	1178.86	1030.18
	562.6	2483.64	2638.82	2551.28	2482.98	2668.48	2900.99	3153.14	3111.01							562.6	1282.71	1501.12	1165.34	1016.86
	562.8	2465.66	2618.61	2558.4	2465.5	2647.37	2909.51	3147.13	3134.93							562.8	1310.93	1506.67	1141.85	1003.4
	563	2441.97	2602.83	2533.73	2462.57	2631.65	2890.29	3125.52	3090.09							563	1277.91	1491.73	1134.75	1005.46
	563.2	2430.45	2593.28	2516.51	2443.44	2630.56	2852.3	3092.4	3075.94							563.2	1278.04	1481.5	1143.29	982.633
	563.4	2410.68	2548.28	2510.03	2427.21	2596.17	2833.25	3069.34	3020.86							563.4	1251.58	1459.95	1110.79	982.587
	563.6	2376.75	2532.26	2460.66	2422.28	2586.02	2841.2	3032.86	3040.1							563.6	1266.83	1482.05	1103.14	967.994
	563.8	2382.65	2505.86	2440.52	2387.22	2547.15	2791.54	3042.68	2992.66							563.8	1219.66	1438.85	1084.54	967.69
	564	2315.34	2460.38	2423.47	2364.13	2501.46	2780.79	2979.43	2945.47							564	1202.75	1416.04	1089.24	942.016
	564.2	2290.06	2438.03	2381.11	2336.22	2508.28	2752.2	2940.46	2926.58							564.2	1194.54	1412.21	1037.93	931.601
	564.4	2250.7	2410.61	2363.18	2317.74	2460.57	2700.69	2917.27	2888.88							564.4	1187.92	1401.3	1048.22	913.384
	564.6	2228.65	2384.19	2327.67	2288.03	2434.3	2669.24	2891.88	2862.68							564.6	1178.55	1356.23	1032.06	920.748
	564.8	2206.83	2351.3	2307.59	2264.21	2406.85	2662.47	2844.3	2852.84							564.8	1175.89	1366.15	1014.33	883.897
	565	2174.95	2319.84	2282.24	2233.16	2391.52	2616.69	2805.65	2812.97							565	1138.98	1341.41	1041.54	868.873
	565.2	2143.97	2302.23	2234.18	2219.16	2355.66	2568.42	2776.68	2775.72							565.2	1126.7	1313.79	989.517	885.667
	565.4	2105.41	2255.18	2216.32	2184.83	2314.35	2526.04	2761.01	2747.94							565.4	1117.28	1308.21	981.562	849.112
	565.6	2080.1	2208.22	2168.73	2141.28	2280.31	2493.67	2695	2711.61							565.6	1096.62	1292.84	942.368	846.712
	565.8	2007.88	2156.38	2116.23	2088.17	2217.72	2413.67	2642.69	2639.21							565.8	1077.28	1254.4	919.246	816.293
	566	1959.15	2110.64	2068.53	2054.2	2205.12	2400.42	2603.62	2586.57							566	1047.41	1243.72	907.766	801.073
	566.2	1911.69	2046.86	2012.66	1990.48	2138.35	2315.05	2538.99	2533.44							566.2	1010.97	1214.62	874.367	775.138
	566.4	1874.17	2001.68	1977.67	1946.39	2086.68	2282.3	2459.13	2472.65							566.4	995.19	1171	838.405	746.065
	566.6	1827.63	1960.04	1929.55	1904.82	2055.1	2214.93	2395.3	2413.11							566.6	987.398	1131.97	828.776	724.276
	566.8	1788.48	1902.69	1872.79	1856.19	1992.12	2176.27	2343.49	2365.49							566.8	949.003	1128.34	803.925	706.948
	567	1733.1	1845.92	1821.35	1814.12	1925.45	2107.52	2283.64	2299.15							567	926.796	1070.23	793.218	692.937
	567.2	1684.23	1816.95	1785.68	1769.76	1886.75	2084.48	2215.84	2244.4							567.2	911.262	1045.04	759.969	682.984
	567.4	1655.5	1774.81	1744.45	1745.19	1862.03	2044.52	2181.13	2198.01							567.4	896.666	1043.42	724.526	649.684
	567.6	1612.67	1741.37	1715.46	1697.9	1838.37	1989.17	2146.77	2156.63							567.6	862.265	1016.18	721.928	645.397
	567.8	1575	1695.56	1663.46	1661.97	1770.89	1944.27	2087.75	2103.93							567.8	840.009	974.864	704.01	627.973
	568	1551.71	1666.99	1641.28	1626.17	1722.15	1905.71	2056.41	2056.4							568	817.719	949.704	677.968	604.472
	568.2	1497.31	1609.61	1596.75	1592.37	1681.76	1845.74	1988.36	2022.83							568.2	820.762	934.099	674.575	591.85
	568.4	1465.6	1580.11	1552.47	1552.75	1654.68	1834.58	1951.6	1961.66							568.4	800.021	906.912	636.835	572.189
	568.6	1415.19	1516.4	1499.06	1505.61	1594	1737.36	1868.38	1890.87							568.6	774.473	876.333	611.375	564.548
	568.8	1356.09	1470.76	1436.09	1455.28	1543.85	1657.09	1818.67	1827.02							568.8	752.44	849.13	597.541	529.249
	569	1321.64	1419.18	1402.38	1407.51	1482.72	1622.42	1763.6	1783.16							569	737.128	816.441	568.684	506.667
	569.2	1258.2	1366.4	1335.86	1344.39	1425.1	1575.49	1684.61	1697.77							569.2	705.691	773.579	552.512	478.969
	569.4	1231.24	1313.49	1292.54	1301.9	1383.07	1512.93	1598.59	1642.63							569.4	665.447	747.792	509.498	465.538
	569.6	1166.25	1239.8	1216.29	1243.01	1318.24	1427.21	1539.31	1580.89							569.6	658.522	729.486	502.41	430.227
	569.8	1115.53	1204.24	1179.68	1181.78	1251.79	1391.54	1471.49	1518.01							569.8	616.174	679.608	478.597	419.173
	570	1073.18	1150.3	1130.82	1143.86	1205.89	1315.68	1399.18	1424.34							570	612.597	650.553	443.507	402.829
	570.2	1041.76	1122.53	1095.51	1103.24	1171.95	1272.94	1365.68	1395.7							570.2	585.222	626.971	429.565	393.563
	570.4	1008.63	1082.53	1061.79	1065.24	1139.68	1251.31	1315.88	1331.58							570.4	579.555	605.96	417.778	372.808
	570.6	980.409	1048.01	1023.02	1024.69	1079.59	1185.3	1284.13	1289.96							570.6	551.084	581.791	397.689	364.7
	570.8	948.931	1012.87	990.325	1001.06	1049.4	1157.29	1238.25	1248							570.8	536.81	553.087	380.868	347.715
	571	919.713	981.544	949.841	959.769	1005.51	1107.94	1180.37	1214.42							571	535.936	539.32	354.894	331.364
	571.2	889.603	937.51	931.302	927.866	989.01	1054.34	1160.53	1166.97							571.2	513.676	529.693	347.642	314.999
	571.4	850.85	906.243	871.485	888.658	943.371	1020.68	1081.87	1117.46							571.4	493.492	507.118	327.905	301.263
	571.6	815.885	869.313	846.263	846.554	912.335	965.083	1031.57	1042.76							571.6	480.641	478.386	308.269	282.977
	571.8	780.442	830.031	811.205	811.991	863.683	922.206	996.447	1024.43							571.8	470.611	461.415	308.022	278.171
	572	745.357	791.995	771.091	780.167	807.91	867.606	917.724	945.123							572	476.4	432.069	299.788	252.936
	572.2	717.737	759.605	736.122	752.362	763.113	838.443	892.328	911.039							572.2	462.915	400.748	290.084	235.665
	572.4	687.624	719.529	694.349	705.091	736.475	788.294	856.774	865.908							572.4	439.766	393.725	269.005	226.437
	572.6	663.566	697.158	665.202	672.144	685.897	764.205	796.605	822.277							572.6	437.213	376.363	253.514	217.062
	572.8	645.011	661.826	632.697	638.2	655.554	709.901	751.02	771.743							572.8	423.574	349.891	239.699	199.218
	573	626.989	642.903	612.793	617.252	635.699	693.2	708.902	733.84							573	410.023	339.491	230.681	187.279
	573.2	609.46	634.19	599.106	598.598	607.83	662.226	698.967	703.94							573.2	406	322.688	219.528	180.383
	573.4	590.194	609.422	577.769	577.474	590.418	641.066	679.34	684.514							573.4	397.27	321.232	211.733	170.593
	573.6	576.34	595.946	561.451	554.123	581.104	616.534	662.396	657.287							573.6	394.264	305.075	205.019	164.281
	573.8	560.761	574.814	537.201	540.126	548.648	576.409	619.314	632.746							573.8	382.397	297.029	187.19	154.888
	574	554.927	553.377	532.132	519.292	541.456	585.513	595.771	603.967							574	379.782	293.836	184.558	147.479
	574.2	535.921	541.121	509.908	502.777	522.775	542.452	581.296	582.485							574.2	374.955	283.351	171.185	137.976
	574.4	529.102	529.874	499.034	488.386	512.824	538.773	551.567	558.363							574.4	369.309	265.341	169.26	126.569
	574.6	512.787	518.985	482.064	475.551	477.53	516.772	540.346	532.955							574.6	360.352	260.223	163.556	122.756
	574.8	512.753	504.483	471.033	453.895	458.815	479.206	517.938	517.561							574.8	353.19	251.192	150.535	116.256
	575	508.4	506.989	489.302	471.417	460.757	495.312	513.91	487.706							575	356.579	242.368	148.547	108.454
	575.2	499.951	500.489	477.348	456.389	439.524	474.795	490.806	474.955							575.2	351.85	248.186	140.162	100.51
	575.4	490.956	489.936	470.832	450.822	435.329	460.079	471.664	461.46							575.4	355.924	238.415	139.415	97.95
	575.6	487.18	486.672	458.888	438.814	426.564	454.089	459.939	452.233							575.6	355.355	232.204	134.022	93.311
	575.8	488.801	475.014	457.375	437.552	413.311	442.579	449.606	433.973							575.8	359.442	237.654	130.665	89.67
	576	506.986	478.752	452.851	435.764	409.623	430.087	448.903	442.449							576	351.224	231.489	137.059	88.929
	576.2	508.554	471.444	445.813	428.045	406.664	416.623	443.443	441.196							576.2	352.167	229.901	124.328	83.684
	576.4	504.144	472.898	446.03	427.325	401.948	417.222	433.621	428.574							576.4	364.52	227.188	123.946	82.657
	576.6	502.141	465.587	440.659	418.586	394.698	411.155	424.24	422.394							576.6	359.938	226.415	118.921	76.943
	576.8	510.237	471.322	444.573	416.711	396.57	418.888	422.428	419.412							576.8	368.192	230.073	118.428	76.544
	577	507.771	468.462	446.7	416.058	388.249	411.176	415.847	416.658							577	365.735	229.568	119.708	74.151
	577.2	513.291	468.178	446.867	418.048	392.182	406.875	416.656	406.204							577.2	372.919	226.143	114.083	67.65
	577.4	513.404	469.825	447.72	418.603	386.311	401.067	415.908	393.86							577.4	372.018	229.485	117.894	68.792
	577.6	528.731	471.983	449.193	416.711	391.455	399.296	408.846	407.9							577.6	371.464	234.973	112.123	68.453
	577.8	530.209	475.718	452.79	417.333	390.906	394.414	408.139	399.096							577.8	380.66	231.136	119.937	65.321
	578	534.508	477.407	453.405	423.443	397.787	408.435	402.731	395.226							578	390.359	229.043	114.943	64.175
	578.2	541.14	483.518	460.191	426.259	398.044	412.826	407.189	402.823							578.2	403.246	240.452	118.515	67.565
	578.4	550.438	491.241	461.765	429.054	403.55	412.101	425.408	401.686							578.4	403.108	244.731	115.864	62.866
	578.6	562.446	494.784	469.891	434.296	401.956	412.611	415.951	405.184							578.6	407.985	248.042	117.483	65.815
	578.8	561.149	493.129	473.216	436.661	407.274	419.344	415.31	414.826							578.8	413.647	243.649	122.611	68.579
	579	543.321	500.483	482.976	441.324	406.611	416.262	427.941	415.973							579	413.85	241.959	121.081	64.601
	579.2	545.262	507.597	486.393	445.043	420.065	420.898	424.563	420.77							579.2	425.014	255.031	127.631	60.77
	579.4	562.794	515.439	495.092	450.66	416.606	418.15	429.279	414.557							579.4	421.365	260.348	125.937	67.231
	579.6	578.982	518.641	495.016	453.387	411.926	427.479	431.548	421.765							579.6	430.267	255.572	126.65	64.99
	579.8	574.218	528.703	502.593	461.389	434.229	438.415	445.893	429.729							579.8	436.009	255.333	120.018	64.702
	580	587.492	538.268	508.804	471.59	427.962	431.376	439.111	424.376							580	438.275	261.874	120.324	67.239
	580.2	595.877	542.084	520.549	475.188	438.899	436.037	450.342	430.709							580.2	450.602	267.161	128.233	68.165
	580.4	602.676	547.31	525.749	485.532	438.966	450.285	453.503	446.667							580.4	443.628	269.692	135.194	62.83
	580.6	618.747	550.636	532.556	486.079	451.244	460.634	462.875	444.656							580.6	464.056	268.853	129.883	65.035
	580.8	624.062	568.925	538.376	495.064	451.323	463.327	466.756	454.561							580.8	466.157	269.752	131.54	63.629
	581	634.003	577.33	542.794	505.91	454.889	483.71	473.799	463.122							581	480.31	279.26	131.507	68.18
	581.2	643.331	581.037	560.663	512.934	469.968	465.324	477.429	458.078							581.2	478.822	279.529	135.659	65.732
	581.4	651.491	595.879	563.497	514.362	473.245	484.839	487.3	478.624							581.4	500.5	277.882	137.878	66.228
	581.6	656.781	599.224	563.988	527.367	484.233	492.513	503.144	484.663							581.6	492.603	280.318	144.583	69.073
	581.8	673.532	601.979	580.734	523.741	492.256	490.776	499.165	491.211							581.8	504.836	290.551	137.279	70.255
	582	678.581	598.884	580.577	527.14	491.229	498.195	504.914	495.573							582	509.843	300.761	140.454	72.641
	582.2	688.504	603.569	581.617	541.533	500.398	509.648	518.502	502.229							582.2	510.588	294.989	145.107	77.829
	582.4	691.327	611.806	591.835	552.377	496.56	521.172	523.221	504.969							582.4	508.551	291.114	145.232	71.642
	582.6	697.745	615.992	601.211	553.466	508.096	507.193	512.319	508.331							582.6	522.845	296.063	150.6	75.445
	582.8	709.68	622.194	612.494	564.592	515.294	518.583	526.827	511.967							582.8	535.816	298.227	149.766	74.955
	583	716.222	630.355	605.679	564.239	526.193	524.703	527.25	519.515							583	526.055	306.764	151.843	74.42
	583.2	723.708	636.165	612.983	563.837	518.485	540.95	533.96	523.932							583.2	550.567	306.242	154.076	73.764
	583.4	745.854	657.095	606.828	588.574	539.172	551.282	549.592	534.018							583.4	553.234	309.864	153.878	71.232
	583.6	742.4	655.819	621.473	595.213	539.353	535.69	558.939	538.518							583.6	560.883	319.583	152.104	76.137
	583.8	771.496	668.259	631.815	597.072	547.652	552.41	557.064	561.647							583.8	565.484	313.367	160.878	78.135
	584	775.522	686.985	646.097	582.735	551.401	566.928	575.586	565.506							584	574.819	316.342	161.871	74.697
	584.2	776.254	685.914	643.921	592.705	555.337	560.949	579.363	573.196							584.2	587.13	322.694	166.932	74.866
	584.4	789.514	709.074	664.966	601.099	574.841	585.984	580.271	577.248							584.4	580.952	330.476	164.551	74.965
	584.6	798.022	710.092	664.162	599.404	582.892	575.423	592.329	579.45							584.6	603.995	326.478	163.939	76.969
	584.8	802.753	720.02	670.871	610.789	584.858	589.189	588.671	587.02							584.8	610.149	340.892	161.972	81.75
	585	810.868	718.151	679.069	613.658	583.324	569.675	593.951	575.348							585	587.072	340.331	167.056	82.586
	585.2	817.726	727.133	688.357	619.125	590.2	589.888	598.05	571.678							585.2	589.782	336.234	165.637	79.927
	585.4	834.815	737.796	692.551	627.905	618.433	595.135	602.606	574.467							585.4	584.664	349.173	171.802	81.254
	585.6	839.135	744.241	693.874	637.989	606.144	594.188	608.637	603.949							585.6	593.589	344.599	175.576	82.566
	585.8	847.043	753.322	714.686	641.523	611.394	607.484	607.559	607.988							585.8	604.504	347.378	176.205	86.722
	586	864.444	763.798	709.971	652.394	614.316	616.974	622.715	601.666							586	622.466	348.936	172.842	82.025
	586.2	875.768	765.338	723.108	658.098	639.715	610.535	618.131	623.067							586.2	625.694	359.367	177.593	84.975
	586.4	879.62	779.136	735.309	666.248	632.201	628.707	633.942	625.428							586.4	618.628	358.078	176.399	84.908
	586.6	893.261	789.373	749.678	673.306	643.23	639.046	644.701	624.564							586.6	644.714	350.944	181.036	87.157
	586.8	897.38	803.768	762.157	686.994	654.767	642.338	654.865	637.053							586.8	645.275	363.989	182.197	83.73
	587	921.735	820.627	760.293	687.524	662.377	647.233	664.483	655.507							587	649.592	364.17	181.175	90.101
	587.2	926.52	821.686	772.047	700.478	675.882	657.122	674.365	654.974							587.2	656.676	367.495	188.851	85.885
	587.4	937.492	825.738	778.065	708.8	673.305	648.797	683.697	654.202							587.4	683.112	373.216	189.35	85.16
	587.6	943.744	833.945	783.42	717.275	686.183	663.464	684.515	651.642							587.6	673.424	374.278	191.832	87.585
	587.8	963.162	848.592	797.961	725.781	699.09	666.755	693.701	685.771							587.8	689.994	375.005	191.02	88.959
	588	957.789	848.485	803.234	725.914	692.709	701.264	687.447	681.609							588	680.199	375.59	202.061	87.177
	588.2	978.015	867.865	810.73	735.027	704.955	673.953	700.343	677.348							588.2	690.511	374.776	193.072	86.261
	588.4	976.705	874.994	820.776	740.304	716.47	701.454	707.75	687.282							588.4	696.809	379.634	195.722	89.397
	588.6	991.345	876.125	815.127	754.933	723.064	687.191	699.501	694.887							588.6	694.951	390.948	204.082	93.252
	588.8	1000.8	888.763	830.167	754.014	730.123	706.568	735.435	709.362							588.8	706.823	390.101	193.183	93.383
	589	1006.46	905.545	841.978	770.177	743.705	710.228	735.465	709.532							589	726.942	393.456	194.031	94.422
	589.2	1023.43	911.314	844.386	779.721	749.215	728.1	753.697	721.469							589.2	725.611	395.883	197.397	95.49
	589.4	1031.63	918.311	864.022	780.924	764.733	728.381	750.678	719.83							589.4	740.335	396.163	206.868	96.554
	589.6	1041.55	924.54	881.519	794.944	736.404	749.766	755.324	742.855							589.6	730.248	395.431	201.255	92.029
	589.8	1061.99	939.065	883.552	803.432	771.414	764.942	770.528	750.559							589.8	750.403	409.206	213.171	94.276
	590	1069.73	942.741	898.757	813.742	773.063	751.026	771.507	748.734							590	760.045	406.072	210.217	96.001
	590.2	1080.9	955.277	901.785	809.336	767.588	762.82	786.855	758.077							590.2	778.785	406.95	217.373	96.699
	590.4	1089.08	971.496	904.938	829.293	789.332	777.609	776.884	773.596							590.4	785.679	413.21	210.063	98.433
	590.6	1105.15	977.127	916.048	830.807	801.475	780.683	793.737	768.501							590.6	773.915	416.189	208.697	98.936
	590.8	1108.54	979.78	928.013	838.838	822.929	795.47	811.227	781.248							590.8	783.966	428.909	211.356	96.236
	591	1129.25	996.884	936.871	854.008	804.652	794.692	806.262	775.399							591	801.271	420.548	215.656	95.305
	591.2	1129.97	1002.63	947.902	855.737	816.488	801.574	816.949	806.001							591.2	799.23	418.888	210.969	95.283
	591.4	1153	1018.73	951.781	867.148	840.851	815.654	809.489	804.352							591.4	802.315	428.426	215.519	103.935
	591.6	1159.11	1017.67	959.221	865.817	823.147	807.384	823.057	801.585							591.6	812.393	428.843	224.362	96.781
	591.8	1165.31	1034.79	961.064	884.092	861.737	818.551	842.3	825.836							591.8	812.473	441.706	215.17	96.091
	592	1170.01	1052.63	992.757	893.246	855.696	828.392	845.931	824.035							592	826.951	440.596	223.805	102.72
	592.2	1193.95	1061.74	1002.1	904.888	894.849	834.214	855.765	825.77							592.2	846.026	436.295	228.505	93.024
	592.4	1208.2	1073.02	1017.27	917.918	886.711	841.676	872.348	848.057							592.4	838.559	435.239	232.955	94.518
	592.6	1227.28	1087.13	1017.82	923.21	877.467	857.374	883.318	856.661							592.6	855.444	441.698	230.774	98.212
	592.8	1237.37	1107.79	1035.66	935.216	895.998	868.857	887.648	875.411							592.8	865.858	441.093	232.592	101.007
	593	1253.71	1111.39	1044.87	939.058	898.9	892.193	897.136	867.817							593	884.492	441.541	225.229	101.887
	593.2	1265.71	1114.74	1061.32	955.369	913.983	883.325	906.3	885.774							593.2	898.153	452.714	236.174	102.781
	593.4	1275.39	1128.5	1060.45	960.132	932.765	891.667	919.124	889.321							593.4	902.657	450.427	234.008	93.766
	593.6	1290.66	1145.49	1076.25	971.62	923.37	891.136	941.442	897.248							593.6	909.818	456.872	231.754	105.307
	593.8	1295.98	1160.99	1078.37	979.217	940.421	919.428	925.641	896.849							593.8	907.888	462.707	240.999	108.539
	594	1310.31	1167.31	1100.86	982.143	945.176	925.738	935.777	911.03							594	918.623	469.115	235.974	98.893
	594.2	1316.45	1184.78	1099.22	1005.35	972.727	915.31	946.313	922.132							594.2	931.94	468.781	244.397	102.627
	594.4	1340.94	1193.8	1116.02	1005.94	958.908	930.352	961.999	936.163							594.4	946.173	465.044	248.337	106.455
	594.6	1354.84	1207.67	1140.29	1017.58	971.129	947.737	972.851	944.879							594.6	942.733	479.12	248.777	102.417
	594.8	1377.99	1222.15	1141.81	1031.61	1005.12	950.136	983.01	958.282							594.8	987.187	478.859	248.808	106.401
	595	1388.43	1228.68	1164.7	1041.73	999.711	990.503	984.024	967.217							595	983.67	473.047	250.901	104.05
	595.2	1400.31	1254.7	1174.71	1066.34	1010.65	975.974	992.94	955.618							595.2	983.571	491.378	254.543	103.134
	595.4	1424.83	1275.59	1188.11	1065.96	1024.06	978.784	1002.68	972.386							595.4	996.044	481.36	262.497	99.459
	595.6	1454.59	1287.56	1202.01	1079.35	1040.09	1003.97	1012.62	987.886							595.6	1022.77	493	263.083	102.96
	595.8	1461.04	1286.17	1219.39	1094.59	1054.69	1027.87	1042.46	1009.35							595.8	1037.52	489.068	258.204	102.075
	596	1460.08	1309.48	1215.11	1117.79	1031.03	1025.62	1053.56	1019.81							596	1048	491.035	254.578	105.618
	596.2	1485.07	1319.97	1241.08	1113.86	1065.5	1036.32	1056.47	1034.76							596.2	1053.21	503.106	270.894	101.006
	596.4	1482.86	1327.76	1254.54	1132.05	1065.91	1045.59	1062.15	1036.41							596.4	1047.78	494.406	269.453	99.423
	596.6	1514.03	1349.17	1263.22	1134.14	1082.25	1062.74	1065.62	1023.79							596.6	1071.95	507.11	271.155	103.625
	596.8	1518.81	1364.09	1279.95	1132.94	1089.38	1047.71	1082.61	1048.02							596.8	1076.16	498.792	268.294	104.917
	597	1531.84	1364.09	1280.49	1163.64	1086.96	1085.01	1070.61	1054.93							597	1077.58	505.752	269.223	111.84
	597.2	1554.88	1387.35	1301.34	1160.01	1116.52	1074.94	1109.83	1069.39							597.2	1079.11	509.782	276.778	103.859
	597.4	1566.66	1404.17	1314.29	1175.16	1128.51	1097.26	1102.92	1078.83							597.4	1117.18	514.28	272.048	108.032
	597.6	1599.08	1424.05	1327.93	1198.05	1140.15	1117.33	1122.38	1081.03							597.6	1119.12	513.769	271.024	106.178
	597.8	1608.35	1447.92	1353.87	1211.98	1141.98	1123.93	1115.51	1096.99							597.8	1141.28	525.763	280.306	108.869
	598	1646.14	1469.98	1382.06	1229.9	1150.86	1146.57	1156.76	1118.46							598	1135.43	528.824	278.736	105.795
	598.2	1662.23	1476.55	1387.37	1232.92	1181.97	1154.62	1153.15	1125.96							598.2	1177.8	543.469	280.221	106.942
	598.4	1686.66	1498.8	1400.17	1258.31	1189	1168.48	1178.38	1152.27							598.4	1188.89	542.934	285.588	101.729
	598.6	1698.04	1518.36	1432.36	1275.95	1212.17	1169.59	1177.74	1172.66							598.6	1197.59	539.763	286.996	104.04
	598.8	1726.31	1535.42	1433.19	1286.85	1207.34	1184.88	1209.91	1176.44							598.8	1224.85	550.17	294.587	103.723
	599	1741.99	1561.23	1466.49	1291.81	1245.82	1200.51	1219.53	1185.6							599	1235.34	548.251	296.754	107.668
	599.2	1759.3	1583.75	1467.36	1309.33	1290.7	1233.05	1222.14	1198.53							599.2	1241.77	540.602	292.772	105.65
	599.4	1779.67	1591.23	1484.28	1324.51	1271.2	1223.53	1246.99	1209.84							599.4	1258.39	549.725	300.411	107.18
	599.6	1806.3	1602.82	1504.34	1348.58	1276.86	1238.72	1241.23	1223.59							599.6	1252.04	560.004	302.251	106.097
	599.8	1813.96	1621.94	1522.7	1348.7	1306.25	1249.86	1268.69	1220.83							599.8	1269.5	551.958	303.245	108.728
	600	1846.57	1655.6	1533.41	1364.5	1293.63	1253.61	1287.15	1243.73							600	1295.33	561.8	308.01	102.964
	600.2	1869.65	1667.4	1550.83	1378.63	1333.79	1272.51	1300.21	1258.01							600.2	1310.66	568.113	304.799	107.509
	600.4	1874.84	1681.43	1573.12	1400.78	1332.04	1293.55	1300.8	1285.89							600.4	1304.05	570.545	302.864	111.928
	600.6	1922.32	1711.04	1612.75	1429.59	1364.12	1303.25	1315.54	1293.37							600.6	1335.49	587.462	306.56	106.62
	600.8	1942.02	1739.33	1619.76	1438.01	1392.65	1342.99	1360.88	1310.62							600.8	1355.09	584.537	315.719	107.984
	601	1966.78	1756.32	1636.24	1457.67	1403.93	1318.4	1358.56	1308.59							601	1363.67	593.696	308.064	107.975
	601.2	2002.86	1777.63	1659.57	1473.63	1410.9	1355.52	1376.85	1334.76							601.2	1425.38	604.216	315.64	112.517
	601.4	2021.62	1817.4	1696.69	1506.95	1429.88	1388.64	1406.95	1359.63							601.4	1409.61	599.62	309.97	113.396
	601.6	2046.88	1839.24	1708.51	1513.74	1448.48	1391.45	1423.93	1360.49							601.6	1457.87	609.348	315.766	113.815
	601.8	2068.74	1863.95	1733.89	1539.76	1455.68	1410.46	1439.1	1371.52							601.8	1435.7	613.682	322.632	103.75
	602	2106	1888.58	1756.45	1559.43	1481.86	1422.86	1439.03	1412.77							602	1468.84	618.909	323.843	110.971
	602.2	2138.36	1900.72	1767.69	1574.62	1473.52	1448.32	1467.78	1424.88							602.2	1485.12	619.384	328.977	105.267
	602.4	2148.91	1918.06	1780.13	1569.52	1494.86	1454.35	1441.97	1444.15							602.4	1499.82	624.897	333.194	107.229
	602.6	2169.77	1956.66	1817.52	1606.34	1531.28	1468.54	1466.12	1464.21							602.6	1508.02	640.01	323.704	105.658
	602.8	2205.03	1948.65	1831.16	1614.97	1568.92	1452.97	1506.42	1450.33							602.8	1524.36	629.386	321.956	110.722
	603	2222.72	1996.4	1845.35	1640.45	1555.86	1507.57	1527.12	1473							603	1560.49	638.74	332.788	110.971
	603.2	2243.38	2022	1865.9	1652.22	1548.99	1513.22	1561.94	1484.41							603.2	1579.74	652.742	337.381	107.316
	603.4	2274.44	2033.96	1910.8	1681.2	1574.94	1532.27	1558.57	1533.2							603.4	1590.01	648.98	350.255	111.259
	603.6	2317.28	2076.15	1935.84	1704.82	1623.16	1552.29	1593.46	1558.12							603.6	1601.75	656.564	345.827	108.894
	603.8	2355.75	2103.28	1963.97	1721.39	1636.03	1568.84	1599.84	1539.78							603.8	1621.52	661.113	333.221	109.958
	604	2384.86	2141.77	1980.25	1754.94	1661.62	1596.24	1626.56	1551.2							604	1667.39	652.714	349.721	108.615
	604.2	2399.14	2157.6	2009.23	1770.03	1689.64	1605.68	1643.66	1594.86							604.2	1694.29	649.941	345.592	112.48
	604.4	2445.24	2219.75	2043.79	1794.78	1704.6	1666.89	1637.04	1616.16							604.4	1712.88	657.711	351.868	103.851
	604.6	2455.57	2221.15	2066.93	1824.17	1718.06	1664.52	1689.88	1624.16							604.6	1722.11	665.912	355.763	109.086
	604.8	2507.02	2253.46	2075.82	1840.41	1747.59	1677.58	1679.71	1658.17							604.8	1768.99	684.759	359.547	113.313
	605	2510.37	2254.87	2117.97	1860.75	1771.42	1686.9	1722.93	1668.25							605	1774.86	677.305	361.816	106.49
	605.2	2564.98	2306.21	2138.07	1879.21	1777.71	1716.68	1754.85	1691.57							605.2	1794.37	700.339	354.053	108.826
	605.4	2599.76	2319.52	2149.99	1905.35	1808.33	1712.4	1726.45	1701.39							605.4	1792.87	705.38	366.429	111.836
	605.6	2621.77	2356.96	2190.16	1927.92	1847.72	1747.55	1762.38	1705.91							605.6	1831.83	707.768	356.967	111.232
	605.8	2653.31	2381.03	2207.5	1943.62	1863.71	1728.58	1788.37	1726.89							605.8	1853.05	714.162	367.311	113.996
	606	2707.61	2418.06	2246.36	1969.04	1865.91	1808.25	1806.03	1771.28							606	1892.58	722.249	371.43	103.402
	606.2	2742.34	2459.96	2278.86	1998.17	1901.78	1828.84	1809.53	1780.05							606.2	1892.98	720.275	373.756	109.688
	606.4	2758.01	2479.01	2295.71	2040.28	1919.4	1841.52	1845.23	1775.22							606.4	1934.6	722.093	374.993	110.009
	606.6	2808.75	2536.35	2346.53	2049.82	1932.91	1864.44	1898.71	1843.03							606.6	1944.66	736.396	372.469	108.87
	606.8	2852.63	2565.99	2387.08	2092.86	1986.13	1872.1	1918.56	1846.19							606.8	1991.15	740.637	391.356	108.669
	607	2893.88	2591.99	2407.66	2119.63	2011.46	1918.56	1935.97	1886.09							607	2020.93	762.657	381.676	110.45
	607.2	2949.58	2645.68	2443.47	2129.92	2014.04	1952.07	1937.23	1882.53							607.2	2057.09	764.224	390.166	107.594
	607.4	2976.27	2669.03	2465.24	2171.24	2067.19	1966.93	1982.92	1924.97							607.4	2080.64	776.459	386.369	112.35
	607.6	3019.06	2715.51	2510.33	2202.81	2063.31	2000.32	2004.75	1926.76							607.6	2108.53	790.519	390.15	113.957
	607.8	3048.75	2751.15	2522.37	2235.76	2110.14	2023.64	2016.7	1975.22							607.8	2134.58	789.708	403.036	111.704
	608	3079.12	2764.75	2555.68	2243.72	2130.34	2031.86	2061.3	1975.67							608	2155.97	786.387	402.359	112.552
	608.2	3110.47	2795.97	2587.18	2274.33	2123.14	2038.78	2048.31	2029.15							608.2	2176.92	805.694	403.184	111.352
	608.4	3146.46	2819.6	2630.26	2300.82	2173.67	2060.39	2108.14	2043.7							608.4	2210.52	825.145	406.694	115.458
	608.6	3196.69	2863.47	2654.39	2330.35	2175.14	2111.57	2077.86	2071.19							608.6	2224.45	832.088	403.155	111.539
	608.8	3226.35	2919.94	2681.12	2333.91	2214.53	2101.03	2136.8	2085.81							608.8	2238.9	827.362	409.5	114.245
	609	3280.86	2932.88	2734.4	2381.11	2230.39	2161.25	2143.01	2123.88							609	2277.54	833.086	418.45	114.611
	609.2	3318.85	3009.66	2770.23	2414.03	2282.35	2166.12	2198.18	2123.83							609.2	2316.96	846.759	416.298	114.522
	609.4	3384.3	3033.8	2805.44	2447.51	2323.24	2218.19	2211.82	2162.95							609.4	2343.68	856.412	417.808	117.571
	609.6	3414.18	3086.64	2845.18	2486.09	2355.59	2244.05	2241.76	2191.28							609.6	2395.07	872.438	434.201	114.08
	609.8	3462.89	3117.7	2901.05	2514.26	2364.74	2263.78	2295.61	2220.32							609.8	2426.3	864.441	428.786	117.732
	610	3528.62	3150.97	2924.02	2550.65	2405.07	2264.55	2317.85	2232.08							610	2461.8	902.814	430.128	122.581
	610.2	3557.98	3213.72	2971.76	2577.45	2452.67	2304.81	2325.45	2252.59							610.2	2479.1	911.96	428.936	119.461
	610.4	3594.25	3259.25	2993.51	2607.33	2434.84	2328.61	2356.34	2264.15							610.4	2541.22	919.919	452.085	121.017
	610.6	3650.53	3283.37	3021.13	2634.39	2463.97	2366.95	2375.27	2316.64							610.6	2536.82	910.552	436.031	113.951
	610.8	3695.54	3292.99	3047.73	2667.76	2475.52	2391.15	2381.96	2342.35							610.8	2547.72	931.944	439.938	115.554
	611	3749.58	3346.49	3073.76	2659.35	2544.41	2406.51	2424.43	2358.83							611	2597.48	940.816	447.862	115.155
	611.2	3752.17	3387.43	3127.02	2736.69	2558.57	2409.6	2427.18	2384.69							611.2	2623.97	952.658	440.455	114.815
	611.4	3798.07	3402.26	3149.45	2752.12	2596.63	2457.6	2437.32	2392.98							611.4	2661.66	965.758	439.364	114.583
	611.6	3840.72	3471.53	3188.14	2788.38	2620.7	2505.17	2504.54	2416.94							611.6	2688.54	971.855	449.039	118.095
	611.8	3892.23	3493.51	3242	2821.5	2662.93	2504.11	2528.56	2439.24							611.8	2732.9	956.824	450.363	119.013
	612	3947.36	3556.65	3275.61	2824.24	2677.36	2545.41	2567.43	2478.51							612	2761.06	1004.65	447.891	116.293
	612.2	4016.72	3606.4	3324.81	2879.09	2707.73	2582.5	2598.28	2527.57							612.2	2787.57	990.288	451.757	122.529
	612.4	4041.68	3655.46	3353.52	2924.49	2753.83	2611.81	2628.62	2556.91							612.4	2848.6	1012.18	449.513	121.714
	612.6	4102.14	3702.35	3388.42	2964.64	2759.35	2653.67	2638.02	2586.22							612.6	2842.28	1016.11	470.349	120.801
	612.8	4180.19	3760.71	3465.59	2984.31	2851.98	2666.61	2683.11	2599.82							612.8	2929.22	1056.13	476.827	118.052
	613	4240.21	3811.49	3510.77	3044.11	2844.41	2721.95	2723.38	2624.66							613	2979.97	1049.96	474.525	119.67
	613.2	4291.95	3871.59	3540.64	3083.36	2876.16	2751.27	2779.53	2658.76							613.2	2974.49	1051.32	490.488	118.57
	613.4	4333.32	3884.25	3579.49	3105.76	2918.42	2719.75	2764.72	2711.56							613.4	3023.47	1073.57	490.322	123.453
	613.6	4353.26	3923.76	3628.19	3132.5	2950.53	2784.93	2798.74	2726.07							613.6	3040.08	1066.33	487.164	113.293
	613.8	4411.46	3984.09	3629.39	3170.72	2970.26	2817.78	2860.18	2765.89							613.8	3081.62	1081.32	483.429	122.423
	614	4461.89	4007.73	3673.02	3192.32	2987.21	2860.86	2872.65	2757.79							614	3095.28	1098.33	487.033	124.254
	614.2	4505.6	4040.04	3722.4	3231.35	3028.76	2867.38	2911.03	2824.69							614.2	3137.88	1107.86	505.501	120.686
	614.4	4552.38	4104.22	3779.98	3274.61	3049.35	2882.66	2913.41	2839.76							614.4	3188.88	1110.21	508.258	126.808
	614.6	4624.02	4154.98	3826.7	3295.03	3144.46	2944	2938.1	2862.73							614.6	3189.86	1131.05	504.714	123.2
	614.8	4663.17	4208.71	3846.91	3346.11	3136.41	2955.26	2980.46	2880.72							614.8	3243.72	1128.13	505.126	122.615
	615	4739.37	4247.24	3902.65	3370.24	3158.81	3006.52	3030.95	2950.48							615	3264.57	1169.09	497.017	120.508
	615.2	4805.33	4328.95	3952.64	3408.65	3197.2	3052.78	3046.24	2963.47							615.2	3319.1	1162.81	512.825	118.18
	615.4	4830.58	4367.95	3994.57	3464.58	3236.9	3032.69	3090.53	3010.86							615.4	3365.99	1184.61	512.434	127.789
	615.6	4922.95	4405.25	4030.11	3517.72	3289.28	3085.95	3089.72	3008.67							615.6	3410.22	1182.95	526.453	125.041
	615.8	4944.25	4448.02	4068.93	3529.38	3312.26	3112.25	3148.31	3047.69							615.8	3443.97	1188.73	521.679	126.16
	616	5003.03	4481.88	4135	3558.29	3340.34	3159.03	3194.34	3082.9							616	3512.74	1218.63	519.65	128.827
	616.2	5046.43	4545.75	4142.86	3609.41	3387.72	3199.47	3184.43	3084.98							616.2	3554.02	1206.97	535.294	123.318
	616.4	5100.34	4586.29	4211.01	3632.93	3447.18	3177.47	3219.92	3116.53							616.4	3567.26	1230.24	533.463	124.323
	616.6	5154.71	4628.69	4254.2	3651.68	3426.09	3237.75	3244.74	3140.88							616.6	3543.88	1248.17	524.965	124.268
	616.8	5203.17	4664.99	4293.4	3682.05	3459.36	3294.5	3294.7	3199.7							616.8	3623.12	1246.03	541.426	124.639
	617	5232.46	4706.65	4330	3727.81	3461.73	3299.95	3281.23	3219.86							617	3658.51	1242.77	528.218	128.793
	617.2	5283.34	4756.09	4355.96	3765.6	3523.24	3315.76	3326.07	3234.18							617.2	3657.28	1295.87	542.329	121.819
	617.4	5319.32	4774.32	4412.71	3781.94	3568.14	3361.2	3360.13	3253.85							617.4	3705.29	1282.77	552.715	128.77
	617.6	5365.23	4839.75	4442.9	3822.24	3562.84	3391.31	3397.07	3299.68							617.6	3750.59	1269.16	548.163	123.005
	617.8	5465	4882.51	4471.26	3863.08	3632.16	3416.82	3397.11	3291.03							617.8	3820.95	1298.26	547.342	127.388
	618	5491.38	4939.83	4533.56	3913.44	3685.97	3434.95	3489.37	3373.91							618	3831.49	1298.21	549.957	131.229
	618.2	5544.72	4989.4	4588.76	3933.3	3676.44	3485.6	3501.92	3354.16							618.2	3910.93	1318.21	559.769	121.213
	618.4	5599.3	5039.95	4603.66	3968.45	3715.47	3529.82	3530.67	3397.73							618.4	3874.28	1338.58	553.153	126.712
	618.6	5634.22	5087.83	4646.64	4014.52	3752.71	3547.37	3534.88	3446.9							618.6	3930.53	1349.4	564.904	118.375
	618.8	5705.44	5120.42	4715.7	4047.28	3789.1	3575.18	3606.92	3473.91							618.8	3974.64	1357.44	555.667	130.979
	619	5739.22	5171.38	4728.8	4074.78	3853.14	3576.89	3610.12	3533.85							619	4013.26	1371.78	569.194	122.448
	619.2	5803.78	5222.21	4785.66	4133.1	3858.59	3655.62	3628.86	3507.18							619.2	4073.62	1384.78	577.619	122.011
	619.4	5845.24	5250.2	4811.37	4120.54	3897.92	3603.3	3637.39	3542.81							619.4	4055.97	1378.4	568.337	125.366
	619.6	5885.8	5272.68	4841.04	4152.24	3910.4	3676.64	3697.32	3577.51							619.6	4080.92	1409.31	585.935	116.294
	619.8	5901.86	5305.99	4864.98	4191.69	3931.4	3702.06	3686.82	3587.36							619.8	4122.69	1391.99	564.582	118.513
	620	5961.32	5367.61	4896.37	4220.38	3972.88	3727.82	3742.19	3621.94							620	4173.78	1416.44	577.061	123.011
	620.2	6005.16	5419.11	4935.88	4275.03	3979.34	3769.23	3785.74	3634.24							620.2	4192.4	1407.6	572.198	124.709
	620.4	6053.69	5457.83	5005.67	4293.2	3996.63	3765.38	3796.01	3694.52							620.4	4244.68	1431.74	599.517	126.248
	620.6	6114.5	5532.12	5043.01	4322.54	4041.14	3826.61	3825.21	3685.39							620.6	4250.87	1416.89	591.556	124.814
	620.8	6169.17	5543.87	5098.23	4371.59	4074.68	3842.84	3831.34	3686.36							620.8	4316.42	1466.97	572.439	125.627
	621	6223.11	5574.69	5125.5	4392.18	4081.89	3846.93	3876.93	3766.61							621	4331.58	1479.2	597.937	120.045
	621.2	6270.16	5636.66	5161.52	4426.04	4112.26	3897.63	3923.42	3756.63							621.2	4373.92	1484.17	583.055	122.072
	621.4	6305.51	5668.65	5185.58	4475.19	4153.73	3914.14	3934.86	3803.91							621.4	4404.24	1484.71	599.12	126.324
	621.6	6355.33	5731.79	5252.62	4510.57	4183.48	3962.15	3930.66	3857.34							621.6	4419.21	1501.65	605.339	123.677
	621.8	6411.65	5762.65	5243.82	4521.16	4202.3	3958.8	3975.3	3866.69							621.8	4475.05	1499.33	595.845	116.059
	622	6444.45	5806.25	5299.75	4528.55	4241.43	4016.55	4037.32	3882.75							622	4493.38	1524.67	587.575	122.178
	622.2	6491.21	5819.27	5335.99	4577.27	4316.98	4004.39	4017.9	3879.09							622.2	4532.68	1517.06	594.129	114.705
	622.4	6528.64	5855.72	5354.85	4613.6	4306.75	4049.99	4045.33	3922.89							622.4	4550	1528.11	598.114	119.568
	622.6	6563.83	5889.61	5376.79	4630.31	4301.46	4070.25	4063.37	3973.55							622.6	4517.03	1532.98	606.704	119.851
	622.8	6596.81	5919.15	5429.79	4647.29	4377.62	4076.79	4057.61	3979.9							622.8	4609.54	1541.73	604.725	113.497
	623	6634.94	5987.29	5465.09	4675.79	4370.76	4147.19	4121.74	3989.03							623	4605.75	1563.5	605.224	115.688
	623.2	6675.75	6026.21	5496.61	4744.07	4400.86	4164.28	4159.42	4013.25							623.2	4584.51	1560.28	613.194	116.031
	623.4	6717.71	6056.04	5538.63	4732.99	4407.6	4177.72	4178.63	4034.88							623.4	4686.71	1542.96	600.097	115.094
	623.6	6788.7	6104.5	5574.27	4760.89	4441.35	4228.52	4186.71	4070.29							623.6	4697.94	1581.59	612.315	111.958
	623.8	6827.98	6148.7	5602.25	4801.12	4532.69	4223.45	4248.66	4077.64							623.8	4772.77	1573.83	620.262	104.76
	624	6846.54	6161.73	5645.07	4808.92	4504.34	4219.94	4281	4128.74							624	4729.53	1571.47	613.902	110.851
	624.2	6882.9	6186.31	5680.5	4863.59	4523.85	4274.6	4258.44	4106.17							624.2	4796.85	1592.79	610.17	109.305
	624.4	6914.46	6243.76	5705.28	4880.94	4596.06	4342.55	4271.62	4148.39							624.4	4868.08	1604.59	606.782	111.588
	624.6	6989.16	6274.21	5727.45	4932.44	4594.3	4348.24	4268.15	4152.48							624.6	4872.82	1615.75	617.433	107.063
	624.8	7008.55	6297.19	5782.65	4939.01	4623.54	4302.8	4335.22	4214.67							624.8	4887.87	1622.51	622.809	104.755
	625	7052.17	6322.39	5770.08	4929.2	4640.05	4347.46	4360.68	4181.96							625	4890.06	1634.1	621.93	104.27
	625.2	7055.86	6360.48	5818.75	4974.45	4672.13	4375.07	4401.48	4184.69							625.2	4911.71	1597.98	620.801	105.559
	625.4	7087.1	6411.61	5853.05	4993.34	4672.01	4373.48	4367.12	4241.62							625.4	4972.25	1660.93	622.783	103.801
	625.6	7119.3	6432.01	5877.14	4999.59	4671.53	4409.25	4429.31	4250.28							625.6	4961.84	1620.91	632.143	103.403
	625.8	7147.38	6484.75	5895.35	5037.65	4645.52	4384.4	4391.87	4290.39							625.8	4996.27	1654.72	639.792	106.649
	626	7218.05	6488.61	5917.26	5082.93	4779.18	4451.41	4417.82	4274.46							626	5011.56	1646.73	622.244	111.288
	626.2	7261.13	6513.17	5954.57	5079.73	4715.66	4472.67	4476.96	4325.2							626.2	5044.75	1657.52	628.524	106.676
	626.4	7275.8	6560.61	5976.81	5115.38	4802.28	4510.92	4500.61	4356.39							626.4	5100.96	1660.64	633.827	101.259
	626.6	7310.5	6606.4	6020.71	5144.69	4784.99	4507.03	4488.85	4330.53							626.6	5096.22	1670.4	630.568	100.507
	626.8	7385.59	6597.14	6049.38	5177.77	4796.56	4518.78	4535.41	4401.01							626.8	5091.65	1698.8	624.198	95.502
	627	7397.02	6642.26	6096.78	5186.54	4836.07	4543.32	4568.92	4415.89							627	5111.01	1701.07	630.534	94.492
	627.2	7440.15	6688.86	6108.77	5207.47	4875.58	4577.85	4617.16	4446.84							627.2	5151.18	1684.39	642.188	93.387
	627.4	7466.29	6721.69	6112.27	5238.28	4871.7	4591.56	4571.73	4449.81							627.4	5164.93	1674.97	640.852	88.28
	627.6	7527.66	6736.54	6129.68	5241.88	4902.09	4622.82	4631.95	4458.42							627.6	5218.43	1710.92	626.317	89.993
	627.8	7542.24	6789.14	6199.48	5277.16	4977.31	4654.87	4621.49	4457.37							627.8	5242.27	1691.97	641.868	93.291
	628	7535.38	6791.45	6240.48	5313.28	4941.04	4627.03	4615.92	4491.43							628	5224.31	1720	639.738	92.308
	628.2	7576.2	6821.23	6236.44	5316.26	4959.29	4657.1	4692.39	4506.15							628.2	5289.97	1726.61	639.497	91.238
	628.4	7600	6868.08	6243.15	5336.34	5007.36	4690.1	4668.14	4528.74							628.4	5276.93	1723.6	633.224	88.735
	628.6	7637.88	6909.16	6272.06	5373.77	5034.12	4675.78	4700.15	4536.46							628.6	5313.71	1719.62	637.787	85.573
	628.8	7676.42	6919.82	6311.03	5384.65	5076.06	4724.23	4711.19	4565.47							628.8	5375.55	1743.05	646.647	91.278
	629	7713.77	6931.69	6323.92	5411.77	5039.5	4726.91	4699.12	4536.92							629	5346.73	1736.88	643.955	87.262
	629.2	7770.46	6970.56	6390.58	5442.94	5050.43	4723.59	4727.32	4616.83							629.2	5330.9	1701.09	645.917	82.085
	629.4	7774.62	6990.28	6392.83	5451.64	5076.74	4779.86	4761.12	4587.46							629.4	5378.39	1756.88	646.304	89.649
	629.6	7832.86	7050.06	6444.79	5474.18	5124.41	4769.89	4782.16	4611.72							629.6	5436.46	1765.63	649.916	85.23
	629.8	7814.83	7058.46	6457.09	5511.26	5109.58	4773.62	4786.43	4659.95							629.8	5437.82	1752.1	631.836	81.056
	630	7872.55	7086.08	6493.68	5535.1	5118.93	4804.9	4799.71	4654.06							630	5480.14	1778.86	648.021	74.164
	630.2	7914.71	7112.37	6487.68	5531.24	5139.72	4840.65	4834.27	4669.62							630.2	5447.25	1763.08	659.052	80.292
	630.4	7944.99	7136	6514.96	5550.12	5149.95	4828.2	4818.77	4702.05							630.4	5515.99	1753.77	643.104	79.659
	630.6	7952.78	7155.25	6529.96	5595.5	5241.13	4881.04	4836.16	4713.14							630.6	5547.45	1765.22	654.762	77.233
	630.8	7995.88	7216.48	6548.12	5593.94	5183.9	4897.55	4829.8	4728.37							630.8	5567.29	1787.16	652.396	78.143
	631	8063.75	7204.63	6582.29	5604.51	5229.91	4881.35	4890.31	4734.32							631	5583.01	1772.96	662.307	76.981
	631.2	8042.39	7250.8	6602.22	5623.13	5238.49	4896.31	4922.64	4744.2							631.2	5568.79	1815.79	648.818	78.434
	631.4	8097.73	7224.65	6617.27	5646.23	5243.37	4923.85	4899.9	4789.89							631.4	5605.09	1804.44	654.814	74.99
	631.6	8068.1	7293.52	6655.25	5674.93	5296.68	4928.43	4961.37	4738.95							631.6	5659.1	1803.22	656.938	72.517
	631.8	8165.06	7326.09	6658.19	5669.6	5272.9	5015.95	4963.26	4817.06							631.8	5659.8	1813.66	658.333	76.983
	632	8138.11	7352.61	6671.51	5712.24	5320.11	5007.12	4976.66	4782.4							632	5711.98	1820.62	663.478	69.416
	632.2	8176.96	7380.93	6696.89	5725.45	5361.13	5008.32	4979.12	4845.16							632.2	5696.15	1823.85	660.826	70.859
	632.4	8233.57	7393.11	6731.59	5744.67	5335.5	5020.42	5002.32	4843.33							632.4	5701.58	1807.49	642.481	67.076
	632.6	8258.04	7415.22	6788.76	5754.85	5373.18	5079.45	5007.25	4869.73							632.6	5746.21	1822.07	653.796	66.507
	632.8	8289.89	7420.78	6778.55	5807.85	5355.02	5039.57	5020.6	4916.03							632.8	5775.97	1826.92	659.101	66.083
	633	8315.35	7452.35	6818.1	5823.42	5394.49	5077.8	5075.93	4915.65							633	5781.76	1830.92	660.898	62.034
	633.2	8314.85	7522.73	6838.78	5832.03	5391.71	5082.23	5042.56	4932.97							633.2	5775.77	1854.3	666.273	63.604
	633.4	8359.78	7525.05	6886.71	5837.44	5380.82	5104.22	5087.69	4919.57							633.4	5780.05	1822.32	662.861	69.546
	633.6	8391.75	7546.42	6885.31	5856.68	5466.18	5133.06	5155.93	4954.67							633.6	5808.28	1865.47	643.584	62.524
	633.8	8399.48	7573.5	6885.31	5885.25	5448.82	5124.99	5125.36	4912.73							633.8	5795.19	1858.25	655.761	64.189
	634	8423.96	7581.66	6915.31	5899.19	5466.54	5145.19	5105.95	4996.02							634	5841.09	1866.02	655.088	65.146
	634.2	8487.64	7571.81	6923.43	5910.4	5547.4	5176.13	5141.2	4985.42							634.2	5796.28	1850.84	659.546	57.091
	634.4	8488.61	7610.51	6950.71	5926.52	5470.88	5137.44	5157.48	4976.82							634.4	5909.63	1870.58	663.394	58.441
	634.6	8530.52	7674.17	7006.63	5957.46	5511.62	5216.99	5217.85	5011.6							634.6	5900.95	1884.05	666.308	59.852
	634.8	8549.44	7685.86	7014.74	5965.82	5571.52	5229.09	5161.07	5013.34							634.8	5993.6	1843.94	656.628	61.123
	635	8579.35	7732.72	7025.82	5999.14	5596.19	5182.49	5233.22	5050.29							635	5953.71	1891.21	658.621	60.514
	635.2	8618.37	7756.73	7067.98	5989.56	5585.64	5293.01	5225.7	5039.99							635.2	5958.06	1881.23	666.778	57.88
	635.4	8665.59	7785.6	7096.06	6051.12	5606.81	5270.56	5208.58	5100.26							635.4	6014.1	1899.13	661.741	58.2
	635.6	8669.04	7826.33	7144.56	6050.25	5637.83	5296.15	5233.73	5105.84							635.6	6029.79	1905.74	668.091	56.498
	635.8	8697.73	7863.34	7121.73	6081.25	5645.79	5290.03	5256.52	5140.34							635.8	6028.98	1903.42	667.924	57.216
	636	8748.84	7858.57	7186.93	6089.94	5699.03	5279.04	5321.8	5120.81							636	6037.63	1901.56	657.428	56.301
	636.2	8772.84	7900.89	7174.9	6100.41	5660.86	5366.3	5355.34	5150.96							636.2	6065.85	1912.74	673.031	57.523
	636.4	8785.4	7941.67	7187.81	6117.13	5689.7	5299.23	5364.34	5183.61							636.4	6088.99	1923.14	657.322	54.95
	636.6	8781.19	7929.15	7245.77	6162.21	5716.25	5289.33	5346.74	5122.47							636.6	6133.46	1918.33	670.535	53.654
	636.8	8849.59	7960.15	7268.02	6149.33	5734.18	5339.73	5342.71	5172.38							636.8	6117.14	1949.66	674.27	49.431
	637	8862.68	7948.78	7256.32	6162.68	5768.82	5378.78	5421.23	5197.22							637	6129.56	1934.32	672.742	53.943
	637.2	8860.94	8016.34	7297.34	6187.73	5769.82	5399.99	5384.93	5178.4							637.2	6187.67	1939.44	676.789	54.222
	637.4	8894.65	8028.5	7319.82	6211.33	5782.43	5419.32	5401.73	5241.48							637.4	6212.8	1971.54	669.478	51.284
	637.6	8950.87	8065.26	7335.54	6257.53	5830.81	5419.41	5409.9	5233.71							637.6	6205.44	1948.52	679.123	51.179
	637.8	8964.53	8089.6	7348.96	6265.16	5799.4	5428.13	5403.24	5222.34							637.8	6276.23	1960.64	677.632	46.891
	638	9002.36	8116.41	7365.96	6273.18	5841.37	5469.62	5445.58	5307.57							638	6204.7	1964.59	671.787	46.817
	638.2	9054.8	8145.79	7400	6313.93	5849.2	5478.78	5520.21	5257.35							638.2	6257.84	1974.53	688.805	46.058
	638.4	9062.34	8172.87	7400.36	6330.99	5896.35	5525.5	5510.77	5306.11							638.4	6340.23	2009.58	681.323	50.95
	638.6	9146.68	8198.06	7455.68	6350.9	5917.32	5503.11	5510.73	5305.21							638.6	6271.01	1983.66	679.748	45.917
	638.8	9100.76	8227.15	7491.91	6383.58	5916.54	5555.76	5522.32	5367.25							638.8	6305.79	1988.56	682.63	45.995
	639	9158.96	8257.26	7531.75	6377.56	5923.88	5531.26	5567.89	5368.46							639	6344.98	1998.16	678.699	43.152
	639.2	9190.03	8275.21	7529.9	6418.81	5974.77	5535.59	5544.75	5362.99							639.2	6366.46	1975.37	686.301	45.793
	639.4	9234.1	8285.78	7571.91	6407.55	5927.9	5591.1	5567.1	5376.63							639.4	6364.35	2030.68	673.501	46.522
	639.6	9196.65	8339.66	7555.64	6434.86	5973.44	5588.93	5619.15	5341.99							639.6	6372.17	2017.18	682.923	45.319
	639.8	9243.2	8334.14	7596.05	6413.04	5999.28	5602.55	5594.18	5378.57							639.8	6378.94	1995.29	695.573	39.966
	640	9275.89	8362.33	7631.02	6440.82	5991.28	5672.86	5635.44	5461.2							640	6480.47	2026.24	676.476	41.548
	640.2	9304.22	8395.05	7661	6468.24	6002.72	5642.12	5626.66	5419.09							640.2	6428.87	2039.37	684.226	42.42
	640.4	9375.46	8440.95	7645.85	6524.6	6070.29	5657.81	5614.9	5470.82							640.4	6488.48	2021.38	692.743	41.979
	640.6	9372.81	8438.18	7699.41	6541.28	6031.23	5666.09	5672.02	5487.07							640.6	6483.32	2038.48	673.97	40.411
	640.8	9409.75	8475.95	7760.02	6523.64	6078.65	5711.62	5722.81	5480.1							640.8	6538.43	2025.41	700.961	43.459
	641	9467.62	8509.46	7745.35	6556.26	6118.5	5699.19	5682.33	5489.11							641	6555.2	2027.34	706.385	41.18
	641.2	9500.63	8566.78	7780.13	6607.62	6112.03	5711.76	5728.74	5569.09							641.2	6584.69	2075.8	698.12	40.611
	641.4	9512.44	8571.69	7803.19	6647.86	6175.75	5782.02	5734.08	5533.69							641.4	6609.61	2046.79	704.483	40.212
	641.6	9529.26	8602.2	7819.36	6627.14	6153.24	5786.76	5758.03	5549.7							641.6	6594.7	2098.37	685.883	45.078
	641.8	9581.36	8614.43	7864.6	6629.39	6189.65	5807.91	5783.05	5561.19							641.8	6670.21	2067.88	699.329	41.94
	642	9609.95	8652.04	7892.15	6693.43	6255.73	5779.87	5729.48	5558.63							642	6619.94	2050.73	700.466	39.809
	642.2	9597.26	8673.03	7903.39	6710.94	6219.25	5781.39	5799.4	5595.37							642.2	6693.55	2101.23	703.233	39.179
	642.4	9653	8675.16	7920.7	6704.97	6271.08	5854.07	5817.68	5607.81							642.4	6669.02	2067.29	693.846	35.902
	642.6	9654.92	8727.42	7940.97	6748.15	6289.14	5837.54	5831.05	5589.04							642.6	6722	2066.16	693.971	37.578
	642.8	9691.57	8746.67	7969.69	6767.79	6263.88	5830.67	5870.85	5644.88							642.8	6731.59	2082.04	697.641	38.301
	643	9737.56	8751.07	7991.29	6793.38	6291.58	5813.88	5849.14	5630.6							643	6721.94	2132.72	694.936	39.125
	643.2	9754.56	8811.84	8000.38	6844.38	6315.5	5881.6	5871.9	5696.04							643.2	6798.37	2102.59	710.377	39.333
	643.4	9806.77	8803.19	8069.55	6831.5	6329.65	5887.83	5884.14	5713.56							643.4	6781.09	2109.45	695.545	37.893
	643.6	9864.38	8826.72	8076.85	6838.39	6354.32	5917.46	5949.99	5643.67							643.6	6829.92	2118.03	698.677	38.132
	643.8	9878.24	8905.18	8097.43	6865.48	6412.69	5960.16	5921.46	5698.6							643.8	6861.01	2135.63	693.142	33.822
	644	9905.07	8908.62	8132.6	6891.56	6441.53	5981.44	5961.09	5722.15							644	6876.75	2142.29	690.604	38.003
	644.2	9924.92	8947.84	8129.27	6900.61	6384.51	5978.43	6005.03	5712.72							644.2	6875.98	2146.8	700.41	36.879
	644.4	9974.21	8995.76	8181.69	6926.38	6433.51	6035.18	6020.35	5739.58							644.4	6844.01	2165.26	703.737	40.856
	644.6	9997.84	8998.73	8213.1	6959.47	6483.67	6025.08	5985.12	5859.51							644.6	6943.83	2132.01	710.259	34.068
	644.8	10044.1	9050.81	8217.35	6979.24	6474.71	6043.41	6068.64	5824.57							644.8	6926.7	2126.33	696.297	33.024
	645	10049.4	9037.39	8241.76	6970.81	6501.63	6054.08	6039.58	5859.72							645	6958.12	2168.84	712.933	37.335
	645.2	10027.9	9077.08	8245.98	6990.75	6534.21	6108.43	6041.68	5836.67							645.2	6978	2164.77	704.757	34.024
	645.4	10082.6	9096.45	8241.03	7009.13	6525.3	6108.06	6069.95	5881.93							645.4	6997	2200.27	718.403	31.534
	645.6	10122.9	9131.95	8325.36	7041.3	6540.05	6103	6108.86	5872.64							645.6	6991.31	2209.68	709.412	34.327
	645.8	10140.4	9132.28	8336.33	7048.15	6539.85	6116.92	6123.07	5885.1							645.8	7012.55	2196.93	716.896	30.861
	646	10152.6	9174.5	8365.77	7056.78	6585.54	6136.05	6132.59	5908.11							646	7071.32	2205.74	723.367	33.708
	646.2	10235.5	9183.68	8389.41	7087.07	6617.45	6179.1	6092.38	5930.66							646.2	7039.48	2200.12	724.746	34.291
	646.4	10244	9248.38	8444.22	7096.16	6610.93	6235.76	6153.9	5950.81							646.4	7038.61	2192.53	715.519	34.512
	646.6	10265	9242.78	8420.98	7145.6	6618.08	6272.84	6194.52	5969.43							646.6	7139.17	2213.87	714.566	33.703
	646.8	10346.1	9295.71	8440.85	7137.02	6637.9	6221.4	6156.99	5970.92							646.8	7140.9	2263.03	724.323	34.606
	647	10342.5	9316.95	8465.01	7183.9	6664.83	6241.27	6239.38	6013.28							647	7171.55	2240.78	711.004	34.442
	647.2	10368.2	9340.99	8506.31	7196.52	6704.34	6272.59	6181.95	5997.45							647.2	7220.94	2216	717.461	31.062
	647.4	10375.6	9349.74	8516.77	7223.61	6687.79	6286.13	6245.67	5982.26							647.4	7181.69	2264.91	723.132	27.963
	647.6	10418.7	9370.49	8525.21	7245.36	6754.13	6271.4	6257.36	6031.23							647.6	7199.41	2263.07	717.008	31.39
	647.8	10440.1	9372.77	8579.3	7257.54	6771.34	6272.69	6258.62	6072.51							647.8	7295.1	2231.51	731.203	28.009
	648	10463	9426.88	8547.11	7254.68	6698.73	6321.51	6266.49	6066.81							648	7189.96	2279.53	735.644	28.944
	648.2	10483.9	9469.82	8595.6	7295.22	6734.86	6280.38	6278.23	6052.77							648.2	7240.01	2260.62	726.654	36.109
	648.4	10513.6	9456.39	8610.23	7270.54	6742.03	6298.36	6268.63	6075.83							648.4	7254.89	2263.04	727.584	33.383
	648.6	10530.1	9495.01	8638.76	7305.74	6768.24	6291.34	6342.25	6164.54							648.6	7310.45	2284.16	727.016	30.335
	648.8	10570.7	9512.43	8603.52	7302.58	6807.85	6383.58	6393	6168.89							648.8	7250.43	2289.67	721.643	32.291
	649	10592.4	9526.84	8652.47	7348.66	6835.85	6328.89	6329.45	6096.61							649	7339.3	2279.21	715.806	27.474
	649.2	10595	9560.55	8673.53	7372.92	6855.18	6427.98	6311.04	6113.25							649.2	7361.59	2297.13	714.154	27.978
	649.4	10655.7	9580.03	8692.9	7398.36	6838.5	6429.74	6446.29	6187.17							649.4	7398.01	2303.5	737.754	30.882
	649.6	10652.3	9598.7	8736.65	7401.82	6866.07	6399.06	6386.32	6134.96							649.6	7400.42	2337.39	735.175	29.19
	649.8	10703.7	9629.27	8756.59	7450.91	6864.66	6455.77	6388.14	6201.8							649.8	7390.61	2299.94	726.188	31.526
	650	10744.2	9678.82	8805.51	7441.69	6915.23	6418.51	6411.96	6210.12							650	7441.75	2316.81	740.44	28.64
	650.2	10709.5	9658.32	8842.93	7454.46	6923.17	6445.77	6439.93	6204.88							650.2	7443.98	2313.27	737.33	26.476
	650.4	10754.4	9685.48	8818.85	7461.21	6991.85	6463.13	6477.65	6199.75							650.4	7441.26	2344.53	739.86	27.719
	650.6	10818.1	9714.33	8827.46	7493.26	6937.9	6445.16	6427	6207.21							650.6	7426.43	2321.14	736.689	25.589
	650.8	10808.7	9710.69	8852.44	7520.55	6958.58	6508.48	6478.35	6236.92							650.8	7544.15	2309.5	740.597	30.149
	651	10821	9736.17	8878.06	7502.96	6969.88	6489.09	6435.97	6217.89							651	7516.8	2285.04	737.967	26.613
	651.2	10900.1	9752.06	8861.5	7533	7018.95	6541.77	6519.07	6256.26							651.2	7488.52	2330.08	746.048	27.336
	651.4	10864.3	9809.86	8933.62	7537.62	6976.73	6518.32	6532.13	6264.26							651.4	7527.39	2335.48	729.553	25.767
	651.6	10884	9823.3	8947.67	7526.42	6976.02	6530.33	6506.43	6333.61							651.6	7512.6	2334.61	731.896	20.774
	651.8	10910.3	9826.59	8931.59	7557.5	7019.3	6508.04	6549.28	6344.71							651.8	7516.1	2358.39	736.084	24.183
	652	10959.6	9845.59	8963.24	7578.41	7077.39	6558.94	6539.72	6312.86							652	7502.64	2338.15	742.88	23.107
	652.2	10966.8	9872.63	8984.02	7601.48	7050.3	6550.03	6608.37	6342.24							652.2	7547.17	2358.98	741.851	27.444
	652.4	11004.5	9883.17	8988.52	7640.82	7037.5	6592.35	6570.61	6354.48							652.4	7587.98	2347.78	731.54	25.596
	652.6	10986.6	9937.08	8977.05	7620.9	7066.62	6563.73	6612.78	6336.06							652.6	7617.96	2400.41	729.58	24.113
	652.8	10995.5	9913.49	9028.6	7659.23	7112.84	6632.82	6592.52	6339.29							652.8	7602.21	2371.14	749.477	24.773
	653	11047.2	9934.44	9025.98	7666.39	7081.87	6609.95	6582.05	6313.51							653	7576.58	2351.16	748.269	28.337
	653.2	11022.7	9956.71	9060.94	7680.16	7114.04	6635.24	6634.71	6367.86							653.2	7636.1	2398.57	740.308	22.136
	653.4	11080.1	9991.31	9057.24	7685.27	7137.83	6663.07	6608.38	6381.97							653.4	7663.13	2374.32	752.904	25.192
	653.6	11106.9	10020	9072	7698.48	7130.78	6648.69	6624.24	6437.1							653.6	7669.72	2410.54	746.445	25.395
	653.8	11162.7	10009.5	9097.17	7703.56	7064.17	6679.31	6639.9	6400.7							653.8	7647.72	2376.42	747.281	20.828
	654	11106.6	10034.8	9102.37	7711.9	7147.92	6664.6	6652.43	6443.44							654	7719.12	2405.92	738.367	25.391
	654.2	11149.6	10058.8	9116.64	7749.65	7170.53	6722.28	6678.06	6486.45							654.2	7730.49	2388.58	742.478	22.604
	654.4	11135.9	10061.9	9165.83	7734.01	7139.33	6705.99	6655.35	6441.92							654.4	7747.27	2380.15	755.059	23.544
	654.6	11168.4	10088.7	9139.84	7758.34	7141.32	6718.87	6741.73	6469.77							654.6	7754.22	2396.4	743.418	26.304
	654.8	11176.8	10093.6	9180.9	7742.16	7245.89	6705.03	6718.31	6451.31							654.8	7707.26	2423.51	767.171	26.813
	655	11228.4	10130.4	9184.04	7788.56	7207.95	6773.32	6700.81	6449.68							655	7774.88	2385.67	753.017	23.08
	655.2	11259.5	10108.3	9195.44	7772.57	7284.71	6738.7	6709.84	6479.48							655.2	7820.28	2382.6	748.17	19.308
	655.4	11224.4	10143.2	9201.1	7782.45	7232.61	6803.28	6798.24	6517.67							655.4	7794.35	2413.74	760.119	22.44
	655.6	11307	10161.7	9231.47	7840.08	7261.83	6782.8	6681.75	6535.78							655.6	7836.2	2398.74	754.14	22.015
	655.8	11316.1	10204.5	9255.3	7853.86	7309.45	6834.98	6755.42	6520.38							655.8	7782.63	2444.99	763.305	20.365
	656	11357.1	10197.1	9269.8	7841.49	7236.85	6805.84	6793.75	6559.51							656	7855.43	2401.79	750.738	19.246
	656.2	11363.6	10219.2	9306.59	7867.46	7245.95	6780.8	6740.05	6556.95							656.2	7812.06	2426.94	753.842	18.472
	656.4	11353.4	10261.2	9352.48	7848.45	7330.61	6810.05	6789.43	6487.67							656.4	7819.15	2436.27	770.895	23.067
	656.6	11370.9	10224.5	9333.28	7904.27	7270.89	6837.6	6796.73	6532.47							656.6	7886.03	2441.86	752.738	19.932
	656.8	11407.5	10247.8	9347.4	7898	7319.41	6839.68	6780.36	6545.92							656.8	7883.7	2434	755.049	24.831
	657	11378.6	10260.8	9313.84	7910.1	7290.34	6876.09	6803.94	6599.84							657	7867.95	2427.63	762.587	21.026
	657.2	11449.2	10321.9	9394.6	7904.87	7358.81	6773.13	6825.38	6636.5							657.2	7849.77	2435.53	755.481	19.943
	657.4	11439	10323.3	9371.1	7910.91	7374.29	6902.08	6842.79	6635.74							657.4	7893.53	2458.79	741.369	23.256
	657.6	11476	10331.8	9367.31	7949.68	7370.08	6835.05	6863.42	6610.13							657.6	7887.77	2459.59	777.174	20.938
	657.8	11512.5	10358.5	9428.74	7970.79	7381.41	6895.39	6840.37	6621.83							657.8	7926.53	2467.63	776.271	17.664
	658	11528.4	10360.2	9467.38	7973.76	7394.15	6902.85	6909.21	6619.07							658	7932.58	2454.72	749.673	20.226
	658.2	11521.2	10380.1	9459.7	7997.67	7390.45	6927.82	6941.53	6653.81							658.2	7880.3	2444.17	752.335	18.951
	658.4	11546.3	10400.1	9456.95	7999.72	7425.98	6958.09	6897.88	6669.03							658.4	7972.16	2465.36	743.026	18.367
	658.6	11586.5	10415	9494.99	7995.37	7472.53	6974.17	6908.68	6635.7							658.6	7954.56	2464.18	745.994	16.591
	658.8	11552.7	10423.2	9496.15	8018.18	7473.76	6931.61	6994.74	6725.64							658.8	8023.21	2479.33	738.62	20.182
	659	11610.5	10468.9	9527.33	8054.3	7429.15	6973.79	6944.58	6672.64							659	8068.37	2459.53	765.405	16.099
	659.2	11625.5	10445.7	9527.37	8034	7439.81	6975.89	6948.06	6718.42							659.2	7994.45	2470.01	740.938	21.66
	659.4	11650.4	10472.5	9531.1	8097.52	7462.31	6994.18	6949.98	6642.01							659.4	8026.57	2467.5	753.106	19.423
	659.6	11642.2	10492.8	9531.91	8077.13	7493.88	6988	6968.69	6724.9							659.6	8032.18	2487.94	764.749	16.512
	659.8	11665.1	10527.7	9607.03	8081.44	7490.39	6993.93	6942.28	6740.92							659.8	8087.11	2488.36	766.168	15.868
	660	11688.5	10560.5	9564.07	8050.86	7518.46	7014.23	7029.46	6735.2							660	8078.5	2504.56	760.188	16.175
	660.2	11738.1	10522.1	9609.18	8137.38	7516.93	7026.35	7012.34	6735.54							660.2	8033.39	2496.24	775.629	15.059
	660.4	11780.1	10592.8	9595.86	8144.06	7536.99	6980.6	7021.33	6750.14							660.4	8062.07	2533.73	765.9	16.484
	660.6	11739.5	10570.7	9629.12	8121.72	7501.62	7020.35	7011.32	6740.33							660.6	8067.59	2511.25	766.152	16.44
	660.8	11788	10549.6	9665.69	8130.34	7552.66	7086.74	7016.1	6761.43							660.8	8099.79	2508.08	766.479	14.003
	661	11792.9	10620.5	9650.12	8165.32	7574.99	7029.69	7026.33	6779.8							661	8100.23	2531.54	756.21	14.999
	661.2	11781.1	10617.8	9679.9	8166.56	7553.78	7065.34	7091.86	6787.12							661.2	8108.24	2539.9	768.952	15.211
	661.4	11803	10642.2	9648.48	8172.68	7566.52	7108.85	7014.32	6728.02							661.4	8084.15	2511.82	774.466	16.15
	661.6	11830.8	10654.7	9702.44	8220.93	7620.59	7079.02	7064.02	6808.4							661.6	8159.25	2527.9	758.888	17.607
	661.8	11889.1	10705.7	9707.01	8236.45	7631.65	7124.7	7073.41	6841.59							661.8	8183.85	2525.81	770.406	13.076
	662	11849.6	10658.4	9700.91	8212.74	7603.26	7092.86	7143.03	6827.84							662	8197.35	2522.38	771.945	16.716
	662.2	11891.8	10693.4	9764.08	8232	7631.93	7116.82	7139.66	6867.82							662.2	8192.95	2516.61	763.824	16.636
	662.4	11908.5	10757.6	9793.81	8235.21	7649.53	7176.26	7085.66	6852.38							662.4	8233.19	2521.66	787.494	12.896
	662.6	11928.2	10718.8	9743.89	8262.68	7673.41	7156.23	7122.54	6870.51							662.6	8254.67	2549.47	787.482	16.243
	662.8	11907.4	10764.9	9810.9	8281.09	7665.51	7147.56	7189.24	6850.32							662.8	8256.97	2555.15	774.71	16.132
	663	11955.4	10735.9	9801.92	8271.52	7639.32	7158.6	7125.31	6861.16							663	8220.99	2566.77	775.863	14.37
	663.2	12016.3	10764	9774.07	8298.21	7689.95	7176.7	7131.13	6877.81							663.2	8266.88	2554.89	775.874	16.391
	663.4	11992.1	10808	9814.09	8320.52	7710.94	7148.79	7196.61	6951.8							663.4	8247.2	2560.69	766.636	14.018
	663.6	11998.4	10777.6	9850.07	8285.02	7750.28	7193.78	7157.9	6868.09							663.6	8330.88	2551.61	802.075	14.889
	663.8	12049	10821	9829.22	8335.49	7716.04	7180.16	7164.83	6963.59							663.8	8386.43	2527.91	791.497	10.555
	664	11997.7	10845.4	9893.58	8316.06	7679.35	7184.23	7182.19	6943.31							664	8314.53	2586.7	772.495	12.357
	664.2	12018.4	10884.4	9873	8347.46	7745.94	7153.36	7224.09	6897.95							664.2	8333.6	2596.8	783.152	16.258
	664.4	12088.2	10878.9	9940.97	8362.46	7720.64	7205.84	7196.19	6926.29							664.4	8346.65	2552.23	778.761	14.921
	664.6	12100.4	10853.9	9924.06	8378.15	7735.75	7256.14	7211.69	6941.67							664.6	8395.55	2572.89	774.092	12.808
	664.8	12095.4	10896.5	9919.49	8392.12	7729.56	7252.44	7244.01	6957.3							664.8	8356.96	2554.28	783.079	13.434
	665	12155.4	10924.8	9938.45	8415.95	7817.82	7267.06	7204.51	6967.94							665	8400.85	2554.68	786.591	11.652
	665.2	12103.8	10957.6	9965.16	8407.95	7751.91	7267.31	7191.77	6976.1							665.2	8345.61	2533.94	788.403	8.479
	665.4	12182.8	10917.1	9977.96	8421.43	7858.1	7316.74	7252.16	7032.56							665.4	8405.81	2568.14	785.715	13.827
	665.6	12174.2	11022.1	9996.06	8411.75	7794.14	7295.95	7224.08	7002.06							665.6	8369.72	2568.88	787.747	11.649
	665.8	12181.1	11007.2	9970.68	8449.26	7831.8	7293.76	7248.64	6981.02							665.8	8437.83	2613.23	804.342	11.506
	666	12176.5	11003.8	9969.68	8442.25	7765.97	7347.23	7228.76	7085.42							666	8418.15	2625.46	790.919	12.813
	666.2	12216.9	10947.4	9996.5	8453.55	7805.54	7313.51	7306.24	7029.48							666.2	8361.78	2597.07	787.53	9.61
	666.4	12239.1	11023.4	9982	8436.1	7808.11	7295.48	7307.15	6967.38							666.4	8489.49	2594.04	795.644	10.089
	666.6	12187.3	11033.5	10050.4	8494.22	7877.77	7321.6	7288.94	7098.31							666.6	8453.82	2567.26	793.504	12.863
	666.8	12185.1	11020.7	10048.4	8424.94	7863.93	7305.18	7319.89	7053.47							666.8	8434.07	2612.34	802.588	12.008
	667	12247.5	11048.9	10028	8497.01	7877.13	7340.31	7308.64	7049.54							667	8498.86	2615.71	776.813	11.403
	667.2	12315.6	11032.6	10064.5	8491.48	7923.02	7340.85	7326.28	7092.1							667.2	8498.43	2619	796.519	12.152
	667.4	12246	11091.9	10091.5	8494.6	7865.53	7336.67	7303.1	7096.19							667.4	8502.85	2614.2	808.512	9.464
	667.6	12301.5	11119	10072.3	8479.52	7829.77	7387.72	7363.87	7115.21							667.6	8474.43	2590.8	801.498	14.469
	667.8	12301	11075.5	10091.8	8535.98	7877.65	7400.05	7363.51	7078.66							667.8	8519.36	2625.95	786.708	7.415
	668	12314.5	11108	10109.5	8539.09	7940.68	7401.23	7379.02	7108.61							668	8551.18	2634.79	805.295	14.546
	668.2	12331.6	11166.1	10114.5	8558.39	7913.32	7387.44	7341.9	7145.18							668.2	8522.44	2617.72	804.144	10.788
	668.4	12367.1	11145.3	10118	8562.63	7909.47	7396.25	7404.19	7112.99							668.4	8598.64	2591.93	805.722	11.991
	668.6	12335.9	11125.8	10134.3	8591.37	7944.24	7381.49	7343.5	7100.77							668.6	8539.08	2649.31	808.55	9.78
	668.8	12342.7	11158.8	10137.9	8540.17	7945.3	7379.91	7343.7	7068.6							668.8	8576.22	2627.85	807.706	5.732
	669	12349	11099.4	10095.8	8542.18	7985.98	7425.89	7365.36	7093.28							669	8547.22	2645.41	801.424	6.959
	669.2	12402.4	11110.5	10180.9	8545.77	7884.06	7386.15	7405.3	7134.71							669.2	8533.46	2653.71	806.453	11.714
	669.4	12379.5	11145	10143.6	8592.78	8002.04	7444.22	7395.57	7147.05							669.4	8527.88	2634.36	783.296	9.662
	669.6	12402.2	11173.2	10164.2	8583.69	7948.36	7442.15	7341.84	7094.43							669.6	8576.45	2631.91	814.671	10.991
	669.8	12405.9	11202.8	10162.1	8540.02	7948.02	7463.81	7408.5	7134.52							669.8	8606.67	2618.7	809.442	5.085
	670	12398	11217.8	10147.2	8597.52	7961.46	7417.7	7381.53	7143.52							670	8581.3	2635.02	798.874	13.105
	670.2	12408.9	11228.5	10203.3	8612.49	8001.47	7470.74	7427.19	7181.41							670.2	8568.42	2655.17	798.151	13.25
	670.4	12421.5	11191.5	10185.8	8633.71	7941.02	7467.64	7424.77	7147.37							670.4	8607.35	2603.96	828.691	8.791
	670.6	12429.6	11210.1	10156.5	8618.09	7952.43	7434.9	7438.22	7183.81							670.6	8636.22	2634.98	789.953	6.658
	670.8	12435.9	11202.8	10189.5	8630.72	7982.2	7456.13	7396.79	7179.66							670.8	8607.55	2641.79	809.474	6.244
	671	12428.3	11189.5	10225.5	8612.53	7981.61	7468.03	7431.04	7174.1							671	8656.22	2633.32	820.749	8.038
	671.2	12460.4	11258.2	10242.1	8599.28	8006.43	7468.09	7392.84	7157.61							671.2	8661.09	2649.58	820.147	7.524
	671.4	12433.9	11219.9	10192.3	8621.08	8012.26	7466.16	7463.57	7170.64							671.4	8627.25	2619.47	782.89	11.614
	671.6	12445	11190.8	10229.7	8647.77	8000.98	7442.23	7454.47	7144.48							671.6	8601.4	2671.26	803.114	9.013
	671.8	12476.4	11228.3	10190	8647.46	7960.62	7438.46	7446.64	7211.69							671.8	8662.1	2634.28	809.156	8.279
	672	12494.9	11205.6	10213.4	8650.79	8035.07	7461.2	7440.06	7170.66							672	8658.75	2606.41	803.378	5.875
	672.2	12508.5	11227.7	10215.7	8645.73	7984.16	7509.49	7433.02	7201.72							672.2	8654.36	2618.8	800.721	7.722
	672.4	12431.5	11221.6	10244.3	8658.88	8001.91	7492.52	7413.52	7178.13							672.4	8625.97	2605.68	799.91	10.316
	672.6	12441.8	11212.9	10285.1	8634.71	8000.45	7477.41	7452.07	7198.56							672.6	8631.66	2624.26	801.879	5.986
	672.8	12496.1	11271.7	10251.8	8635.18	7967.28	7455.04	7472.76	7186.05							672.8	8709.31	2604.92	793.889	10.195
	673	12486.8	11275.9	10267.2	8640.09	8006.17	7506.22	7414.28	7166.11							673	8626.07	2640.54	805.797	8.392
	673.2	12471.5	11235.5	10241.7	8650.81	7991.7	7423.33	7489.02	7194.88							673.2	8609.88	2643.63	801.14	4.211
	673.4	12457.7	11294.5	10232.5	8644.4	7995.38	7506.74	7439.88	7210.26							673.4	8647.22	2662.97	793.122	5.652
	673.6	12545.1	11268.5	10261.9	8683.97	7988.65	7531.73	7494.17	7220.93							673.6	8626.27	2628.81	805.662	5.796
	673.8	12468.6	11294.2	10226.9	8645.26	7998.45	7506.64	7434.69	7171.48							673.8	8598.14	2632.23	809.594	4.25
	674	12495.9	11301.2	10240.5	8655.37	7998.12	7507.68	7371.96	7133.6							674	8653.15	2657.88	783.983	5.393
	674.2	12465.1	11227.6	10234	8660.56	7995.96	7526.18	7477.07	7241.84							674.2	8621.2	2628.02	809.019	5.652
	674.4	12538.5	11280.7	10250.1	8642.02	8039.84	7497.1	7497.48	7191.91							674.4	8653.72	2601.11	795.234	2.949
	674.6	12501.8	11244.8	10267.5	8667.17	7934.13	7484.05	7436.97	7229.49							674.6	8671.51	2640.03	819.708	4.581
	674.8	12482.7	11270.7	10270.6	8666.42	8017.84	7459.45	7479.72	7216.62							674.8	8642.86	2625.58	795.174	6.234
	675	12480	11251.5	10234.1	8635.39	8012.53	7507.22	7455.5	7157.46							675	8649.98	2646.91	792.082	4.353
	675.2	12513.3	11229.3	10261.4	8632.52	7996.49	7481.05	7398.82	7131.81							675.2	8676.19	2620.71	795.629	10.503
	675.4	12498	11304.1	10224.8	8652.06	8045.92	7480.04	7458.7	7223.75							675.4	8623.18	2636.17	791.879	7.773
	675.6	12523.7	11232.6	10249.8	8625.62	8037.85	7466.2	7457.73	7214.82							675.6	8624.63	2653.86	807.323	5.166
	675.8	12442	11254.2	10244	8650.62	7981.95	7507.01	7504.91	7187.22							675.8	8626.19	2596.8	786.128	7.035
	676	12506.6	11279.6	10259.7	8674.52	7995.75	7547.37	7401.58	7195.18							676	8644.88	2640.86	810.524	4.708
	676.2	12483.3	11256.2	10288.7	8646.22	8014.15	7498.51	7445.16	7168.63							676.2	8597.14	2640.54	777.097	4.434
	676.4	12544	11255.7	10230	8656.03	8031.86	7542.03	7479.83	7203.75							676.4	8592.45	2611.52	790.442	3.298
	676.6	12485.3	11270.2	10276.8	8664.82	8000.1	7472.5	7412.39	7196.25							676.6	8634.72	2621.22	813.767	3.346
	676.8	12454.4	11240.5	10257.5	8645.42	8016.39	7452.29	7445.3	7181.19							676.8	8620.86	2622.77	806.9	2.666
	677	12458.3	11247	10252	8613.22	7987.35	7438.73	7436.56	7179.16							677	8621.54	2580.44	796.231	5.238
	677.2	12505.7	11230.1	10232.7	8660.48	7960.21	7549.13	7423.58	7163.51							677.2	8599.06	2652.92	804.941	4.072
	677.4	12464.5	11194	10248.4	8668.31	8007.18	7475.12	7475.15	7178.03							677.4	8615.35	2598.01	798.899	5.659
	677.6	12494	11237.3	10202.1	8595.45	8000.09	7469.46	7433.22	7197.7							677.6	8604.94	2600.1	799.237	2.703
	677.8	12441.7	11237.7	10214.3	8613.43	7945.46	7431.87	7415.97	7147.47							677.8	8552.73	2596.69	793.03	3.867
	678	12436.3	11191.7	10244.2	8649.69	7970.7	7392.87	7387.43	7166.93							678	8627.38	2670.4	779.166	2.661
	678.2	12424	11212.4	10219.5	8624.14	7986.3	7478.52	7481.98	7137.61							678.2	8612.26	2606.72	791.775	4.128
	678.4	12437	11218.8	10192.2	8603.15	7973.92	7426.93	7440.83	7178.07							678.4	8600.59	2611.23	781.964	0.192
	678.6	12433.9	11223.2	10190.2	8630.32	7980.66	7434.02	7446.54	7129.47							678.6	8557.87	2632.28	789.707	3.811
	678.8	12433.3	11227	10246.8	8621.73	7971.54	7457.05	7404.29	7158.78							678.8	8527.89	2601	803.851	2.576
	679	12393.9	11177.5	10207.7	8625.08	7952.58	7446.3	7421.48	7157.46							679	8574.51	2590.29	771.1	6.694
	679.2	12443.3	11268	10177.7	8615.39	7979.83	7416.95	7407.58	7128.48							679.2	8574.91	2605.63	797.853	3.568
	679.4	12424.1	11159.2	10172.6	8590.69	7962.98	7432.45	7419.6	7131.84							679.4	8575.51	2574.99	795.492	1.215
	679.6	12371	11153.7	10195.2	8614.67	8001.07	7462.61	7336.61	7126.28							679.6	8524.73	2590.68	780.354	1.314
	679.8	12368.9	11187.5	10174.1	8586.57	7909.37	7446.8	7413.97	7097.05							679.8	8534.14	2625.6	787.928	-0.172
	680	12354.3	11111.7	10159	8584.04	7958.12	7408.17	7340.36	7084.89							680	8549.19	2579.91	778.716	2.361
	680.2	12338.9	11143	10155.8	8512.5	7904.93	7335.17	7331.51	7099.93							680.2	8572.47	2597.29	802.743	2.333
	680.4	12341.4	11103.3	10121	8567.54	7930.87	7383.78	7305.82	7099.17							680.4	8512.57	2554.74	781.761	0.141
	680.6	12338.1	11107.8	10125.4	8511.65	7864.61	7417.1	7348.76	7083.71							680.6	8437.88	2583.05	770.527	1.027
	680.8	12302.9	11119.9	10123.6	8526.78	7947.07	7372.45	7356.63	7076.31							680.8	8511.58	2563.26	781.094	0.749
	681	12264	11076.3	10096.6	8490.75	7813.44	7294.35	7379.65	7023.48							681	8463.78	2537.86	760.018	-2.288
	681.2	12290.9	11052.1	10093.6	8541.71	7849.36	7348.27	7267.66	7098.11							681.2	8496.58	2559.8	785.834	3.542
	681.4	12269.4	11128.4	10102.6	8525.04	7860.76	7343.06	7313.22	7084.31							681.4	8416.86	2561.88	779.141	1.417
	681.6	12275.3	11046.1	10058.2	8518.43	7923.7	7387.06	7358.68	7047.26							681.6	8472.72	2559.4	781.838	-3.335
	681.8	12266.4	11072.9	10056.2	8526.49	7912.05	7343.9	7331.36	7018.34							681.8	8447.67	2585.51	779.356	-0.776
	682	12244.5	11068.5	10048.1	8521.64	7848.84	7297.95	7283.54	7032.14							682	8496.06	2611.57	768.475	-2.811
	682.2	12250.3	11045	10062.7	8459.11	7869.58	7282.68	7275.83	7051.62							682.2	8453.04	2560.34	771.029	-2.415
	682.4	12209.7	11043.4	10035.3	8442.61	7805.74	7360.94	7318.42	7027.74							682.4	8498.23	2578.39	762.123	-0.703
	682.6	12193.9	11043	10069.4	8463.25	7785.33	7314.15	7241.02	7044.05							682.6	8404.05	2586.82	757.028	-0.216
	682.8	12177.4	11006.2	10022.5	8428.86	7794.16	7317.89	7254.35	6994.51							682.8	8388.98	2568.41	776.574	0.883
	683	12173.2	11019.6	10010.7	8401.6	7771.39	7372.58	7305.66	6973.28							683	8353.51	2515.24	764.502	0.949
	683.2	12156.5	10933	9936.7	8434.05	7748.16	7224.94	7239.03	7029.42							683.2	8375.22	2528.59	768.033	1.343
	683.4	12126.1	10924.8	9956.05	8394.98	7780.49	7259.73	7168.44	6991.96							683.4	8399.2	2525.58	761.503	-0.92
	683.6	12132.5	10928.8	9951.08	8362.32	7797.6	7160.44	7172.93	6908.22							683.6	8336.55	2544.94	761.528	-0.024
	683.8	12079.9	10858.2	9924.95	8369.45	7699.48	7244.44	7228.54	6939.59							683.8	8315.07	2530.61	756.405	1.041
	684	12061.3	10871.7	9896.12	8341.14	7692.3	7269.22	7118.49	6952.86							684	8275.87	2525.7	763.803	-4.255
	684.2	12008.6	10886.2	9865.13	8362.86	7746.67	7205.24	7199.2	6985.58							684.2	8285.97	2529.33	748.624	-0.207
	684.4	12044.1	10849.3	9867.9	8339.19	7781.66	7237.36	7144.33	6907.99							684.4	8266.28	2544.21	728.575	-1.085
	684.6	12041	10830.2	9863.1	8356.09	7747.35	7212.06	7213.11	6911.72							684.6	8307.75	2554.82	755.616	-3.756
	684.8	11991.7	10839.5	9889.56	8332.6	7728.44	7153.8	7126.63	6946.03							684.8	8291.73	2515.84	780.037	-0.934
	685	12026.5	10782	9871.06	8350.4	7710.94	7131.32	7130.47	6859.78							685	8280.12	2522.18	767.936	-2.377
	685.2	11962.5	10821.2	9862.47	8262.35	7694.1	7160.81	7178.45	6920.64							685.2	8222.68	2501.2	761.302	-1.843
	685.4	11925.3	10762.9	9799.33	8296.09	7619.24	7140.8	7198.61	6834.94							685.4	8295.43	2464.21	744.261	-1.965
	685.6	11909.3	10710.6	9828.45	8248.06	7577.73	7057.02	7080.12	6814.98							685.6	8213.68	2449.56	766.948	-1.149
	685.8	11907.4	10712.1	9806.02	8231.02	7650.66	7097.82	7083.15	6824.57							685.8	8192.56	2498.41	754.952	-2.435
	686	11882.5	10705.6	9752.25	8246.53	7615.29	7145.26	7056.86	6774.66							686	8170.9	2466.5	748.774	-4.485
	686.2	11892.9	10700.7	9717.82	8203.16	7580.42	7093.54	7005.36	6843.28							686.2	8128.48	2495.39	745.848	-1.601
	686.4	11837.2	10644.6	9747.72	8241.48	7545.44	7073.55	7042.51	6795.45							686.4	8077.27	2460.02	752.552	-5.292
	686.6	11742.7	10638	9727.7	8167.38	7513.82	7060.59	7078.84	6715.96							686.6	8180.59	2485.7	743.002	-6.317
	686.8	11820.4	10616.2	9720.42	8165.99	7541.59	7031.41	7069.43	6791.72							686.8	8107.66	2486.67	754.364	-3.952
	687	11752.1	10623.2	9665.66	8149.53	7506.45	7076.35	7015.62	6791.41							687	8144.76	2463.4	737.365	-2.557
	687.2	11766.5	10590.4	9681.04	8191.74	7556.49	7069.55	6939.62	6776.78							687.2	8134.1	2421.33	745.126	-2.386
	687.4	11726	10641.6	9624.56	8178.89	7538.74	7009.56	7022.94	6732.52							687.4	8110.91	2456.07	754.012	-3.458
	687.6	11710.2	10559.3	9637.26	8107.7	7514.23	7015.44	6919.88	6770.03							687.6	8033.35	2442.5	745.59	-6.253
	687.8	11683.3	10566.6	9608.19	8104.25	7482.88	6989.08	7042.82	6738.42							687.8	8064.16	2429.42	736.669	-6.519
	688	11662.5	10507.5	9570.57	8096.38	7518.33	6960.64	6930.53	6696.35							688	8047.93	2433.87	748.147	-3.318
	688.2	11662	10455.3	9501.19	8078.11	7421.82	7016.64	6924.65	6732.32							688.2	8066.87	2472.18	734.142	-8.252
	688.4	11573.6	10392.5	9550.47	8049.08	7381.31	6934.43	6893.48	6704.91							688.4	7964.51	2459.05	739.367	-2.201
	688.6	11589.3	10455	9515.44	8014.3	7379.65	6960.66	6876.67	6662.16							688.6	7986.69	2413.43	728.254	-4.854
	688.8	11565.9	10411.5	9466.37	7994.72	7435.12	6910.43	6957.52	6679.21							688.8	7940.71	2414.05	717.735	-8.39
	689	11509.1	10417.5	9461.44	8004.09	7373.68	6897.64	6871.59	6703.19							689	8024.1	2402.58	718.2	-6.648
	689.2	11486.4	10376.9	9454.55	7979.84	7341.18	6886.35	6849.4	6594.64							689.2	7923.23	2387.19	733.035	-7.792
	689.4	11471.1	10356.9	9449.75	7983.31	7353.25	6904.31	6863.43	6630.48							689.4	7927.78	2429.13	718.018	-1.554
	689.6	11484.6	10381	9437.01	7968.02	7338.63	6914.82	6786.52	6617.09							689.6	7867.24	2401.59	704.293	-5.715
	689.8	11464.9	10321.8	9411.92	7906.21	7258.92	6853.1	6858.78	6589.22							689.8	7861.16	2351.52	705.19	-3.864
	690	11425.7	10321.5	9382.25	7947.07	7299.86	6814.91	6878.71	6520.56							690	7845.88	2378.34	723.751	-5.927
	690.2	11401.7	10314.4	9365.4	7925.35	7337.78	6767.28	6773.25	6548.69							690.2	7842.44	2371.16	714.661	-5.497
	690.4	11400.9	10312.1	9370.21	7924.69	7317.23	6773.14	6811.2	6478.24							690.4	7796.84	2361.21	726.171	-9.253
	690.6	11336.6	10189.2	9287.15	7865.28	7300.79	6765.53	6781.18	6440.91							690.6	7839.66	2359.58	718.45	-6.851
	690.8	11291.3	10224.6	9248.63	7844.9	7262.5	6794.98	6745.78	6520.9							690.8	7771.22	2345.42	707.076	-7.651
	691	11325.6	10211.9	9272.95	7870.14	7183.98	6778.26	6767.15	6434.25							691	7816.58	2368.72	714.469	-8.624
	691.2	11225	10094	9251.64	7799.03	7164.44	6670.68	6683.09	6532.03							691.2	7753.32	2308.85	718.696	-5.583
	691.4	11196.7	10104.9	9267.71	7808.06	7191.42	6759.06	6713.27	6494.69							691.4	7769.86	2323.45	703.856	-6.379
	691.6	11160.3	10097.8	9206.97	7742.28	7140.59	6733.6	6640.51	6454.28							691.6	7742.58	2296.44	691.823	-8.377
	691.8	11152.7	10095.5	9181.72	7745.5	7161.59	6724.78	6670.46	6432.96							691.8	7732.59	2306.36	701.629	-8.28
	692	11153.5	10022.2	9138.22	7719.51	7108.38	6630.6	6661.24	6461.76							692	7666.96	2294.47	709.601	-9.745
	692.2	11096.8	10028.2	9087.71	7716.91	7148.59	6681.49	6655.77	6394.53							692.2	7603.9	2304.53	710.577	-8.803
	692.4	11097	10038.7	9113.24	7719.53	7098.75	6652.39	6589.5	6408.25							692.4	7647.32	2304.8	683.87	-3.195
	692.6	11127.2	10012.5	9089.08	7684.7	7118.42	6625.13	6587.02	6413.64							692.6	7655.64	2271.76	684.026	-6.535
	692.8	11050.9	9966.46	9077.66	7694.35	7111.32	6625.9	6611.99	6379.37							692.8	7634.98	2282.51	690.865	-8.277
	693	11057.2	10001.2	9099.1	7620.93	7024.96	6657.48	6563.11	6389.44							693	7552.94	2289.21	694.688	-8.84
	693.2	10994.4	9973.67	9047.56	7635.53	7034.67	6592.95	6589.46	6357.66							693.2	7597.9	2270.64	691.053	-7.189
	693.4	10957.3	9888.92	9013.15	7601.81	7044.9	6612.43	6566.46	6344.48							693.4	7528.6	2298.97	683.535	-5.556
	693.6	10922.6	9889.38	8994.25	7569.25	7013.38	6534.32	6523.16	6291.44							693.6	7546.18	2291.15	662.904	-9.863
	693.8	10907.1	9820.89	8976.84	7573.87	6936.17	6554.55	6435.32	6268.86							693.8	7457.51	2245.97	681.695	-10.465
	694	10895	9821.19	8911.41	7564.44	6923.35	6587.08	6525.3	6301.42							694	7545.16	2242.77	666.051	-7.744
	694.2	10820.5	9785.94	8936.72	7526.13	6950.26	6515.48	6413.71	6266.88							694.2	7529.99	2255.33	665.095	-6.994
	694.4	10817	9759.69	8938.96	7526.22	6917.53	6442.41	6482.16	6206.31							694.4	7417.95	2248.81	682.083	-9.182
	694.6	10772.1	9728.4	8844.83	7480.73	6917.94	6420.82	6424.65	6229.72							694.6	7390.34	2231.71	679.571	-9.276
	694.8	10744.9	9692.86	8834.37	7440.82	6868.35	6396.94	6422.58	6157.14							694.8	7440.62	2204.9	670.871	-6.297
	695	10748.8	9686.71	8789.31	7455.88	6856.49	6446.18	6419.7	6204.93							695	7380.24	2248.34	685.51	-8.812
	695.2	10708.8	9690.29	8829.15	7423.39	6920.79	6430.22	6444.45	6177.2							695.2	7384.98	2209.51	655.077	-9.81
	695.4	10701.7	9668.01	8782.04	7445.51	6900.65	6481.5	6409.48	6208.04							695.4	7334.06	2222.49	670.961	-13.166
	695.6	10627.2	9649.13	8790.87	7416.52	6832.38	6432.02	6369.19	6194.35							695.6	7409.47	2228.39	665.287	-9.128
	695.8	10668	9617.35	8812.21	7433.21	6861.13	6360.57	6316.22	6190.08							695.8	7370.43	2223.21	671.251	-9.191
	696	10599.7	9623.09	8735.59	7381.07	6795.84	6360.32	6322.14	6100.06							696	7286.57	2193.21	675.202	-12.441
	696.2	10626.2	9525.94	8662.12	7383.75	6845	6354.83	6280.97	6101.45							696.2	7347.45	2185.73	663.915	-9.731
	696.4	10553.9	9540.72	8657.63	7352.72	6823.38	6323.83	6326.99	6109.39							696.4	7264.75	2182.19	660.34	-11.776
	696.6	10509.1	9490.7	8698.81	7322.79	6710.53	6317.1	6250.75	6046.97							696.6	7289.61	2167.9	656.052	-7.37
	696.8	10532.6	9460.72	8644.72	7278.39	6718.1	6266.57	6253.53	6067.11							696.8	7194.33	2158.82	649.073	-11.043
	697	10488.6	9471.99	8624.59	7278.21	6698.7	6245.09	6290.84	5985.18							697	7200.12	2158.1	662.611	-10.713
	697.2	10422.8	9397.68	8602.42	7214.86	6766.73	6287.26	6205.16	6017.42							697.2	7139.02	2138.52	633.12	-12.549
	697.4	10357.8	9375.33	8575.85	7229.87	6684.78	6257.78	6228.25	6038.52							697.4	7174.91	2144.67	646.915	-13.208
	697.6	10374.4	9349.18	8551.59	7194.47	6690.73	6181.54	6159.21	5991.16							697.6	7133.09	2133.33	644.692	-13.329
	697.8	10336.7	9351.19	8506.09	7179.49	6601.43	6196.78	6203.67	6017.12							697.8	7117.89	2125.22	653.636	-11.975
	698	10311.2	9357.31	8520.86	7150.16	6631.84	6169.62	6156.59	5956.42							698	7073.82	2123.51	627.575	-14.084
	698.2	10315.5	9279.72	8472.95	7138	6646.65	6153.68	6084.7	5943.22							698.2	7102.93	2086.59	651.588	-12.203
	698.4	10263.2	9268.47	8481.22	7153.3	6537.34	6147.34	6102.84	5914.58							698.4	7129.43	2116.88	639.249	-13.023
	698.6	10228.3	9253.67	8457.74	7121.4	6610.66	6166.73	6093.62	5912.37							698.6	7052.03	2093.34	635.395	-11.881
	698.8	10217	9210.26	8435.25	7096.85	6583.73	6120.12	6049.77	5863.71							698.8	7007.1	2088.53	654.667	-12.107
	699	10213.4	9196.86	8384.11	7036.61	6517.58	6074.9	6098.28	5843.93							699	7067.5	2101.64	647.542	-13.85
[truncated: 505 more rows]

## Sheet: Figure 3
Note: Absolute fluorescence intensity shown.
Figure 3a																													Figure 3c
	Substrate conc. (µM)	Prerun						Run						Difference (Prerun - run)						Percentage Quenching										Wavelength (nm)	PCO4.Ni+RAP2.12
		PCO4			PCO4.Ni			PCO4+RAP2.12			PCO4.Ni+RAP2.12			PCO4+RAP2.12			PCO4.Ni+RAP2.12			PCO4+RAP2.12			PCO4.Ni+RAP2.12								PCO4.Ni only	No O2	O2 after bubbling	O2 (1 min)	O2 (2 min)
	0	194434	194275	222388	147072	162923	161746	201054	200702	230368	150921	172749	166899	-6620	-6427	-7980	-3849	-9826	-5153	0.200068	0.299575	-0.436624	1.65021	-2.17894	0.694298
	10	194906	193618	200600	168949	164711	143494	204005	199223	194027	173615	163795	152026	-9099	-5605	6573	-4666	916	-8532	-1.07231	0.725139	6.77069	0.95295	4.36644	-1.57219					300	21.08	19.8	21	20.03	20.32
	20	196944	195694	190674	170615	176904	179679	202155	206140	195657	173394	178355	170910	-5211	-10446	-4983	-2779	-1451	8769	0.91295	-1.75631	1.06255	2.04964	2.72747	8.37327					300.5	22.32	21.02	22.27	21.22	21.55
	40	200732	200768	194743	170153	176743	149665	207855	204295	211254	175111	172072	149418	-7123	-3527	-16511	-4958	4671	247	-0.0567921	1.73434	-4.87925	0.774597	6.19374	4.3584					301	24.02	22.66	23.96	22.87	23.18
	80	202788	204474	197641	173173	172639	180196	209926	207387	213999	174810	170700	169295	-7138	-2913	-16358	-1637	1939	10901	-0.0636132	2.00319	-4.73029	2.67882	4.75848	9.5324					301.5	25.52	24.1	25.51	24.33	24.67
	160	202728	201973	193519	172345	179845	170527	204870	208155	215622	161048	170428	159278	-2142	-6182	-22103	11297	9417	11249	2.40075	0.409461	-7.79975	10.1964	8.72585	10.277					302	26.84	25.32	26.77	25.56	25.92
	320	200289	198679	189603	175444	173097	164795	202983	214323	193941	133807	135509	131911	-2694	-15644	-4338	41637	37588	32884	2.15439	-4.34621	1.40873	27.3096	25.3407	23.7629					302.5	28.28	26.6	28.08	26.85	27.25
	500	200952	200557	190332	168808	168422	160432	203236	217230	192824	116133	111591	150032	-2284	-16673	-2492	52675	56831	10400	2.35131	-4.81858	2.37322	34.9219	37.4696	10.3944					303	29.8	28.08	29.68	28.36	28.75
																														303.5	31.82	29.95	31.64	30.26	30.67
														Average zero control =		-7009	Average zero control =		-6276											304	33.75	31.78	33.56	32.12	32.54
																														304.5	35.76	33.69	35.6	34.07	34.5
																														305	37.24	35.1	36.99	35.45	35.88
Figure 3b																														305.5	38.96	36.63	38.61	36.99	37.46
																														306	40.57	38.19	40.27	38.56	39.06
	Substrate conc. (µM)	Prerun			Run			Difference (Prerun - run)			Percentage Quenching																			306.5	42.47	39.92	42.09	40.38	40.82
		PCO4.Ni			PCO4.Ni+ vCPH			PCO4.Ni+ vCPH			PCO4.Ni+ vCPH																			307	44.66	41.96	44.23	42.45	42.94
	0	210608	198003	217903	219333	208057	225378	-8725	-10054	-7475	0.0125035	-0.657902	0.585735																	307.5	46.55	43.74	46.08	44.24	44.77
	40	215891	211905	221811	222769	218014	231659	-6878	-6109	-9848	0.867722	1.24694	-0.494415																	308	48.17	45.26	47.69	45.82	46.31
	80	220368	220117	225114	227945	232559	233540	-7577	-12442	-8426	0.532896	-1.67668	0.144519																	308.5	49.71	46.61	49.15	47.19	47.71
	160	222520	220363	225861	231871	225649	237627	-9351	-5286	-11766	-0.269489	1.57256	-1.33474																	309	51.66	48.4	50.98	49.01	49.53
	320	225338	224775	226338	225928	224844	234096	-590	-69	-7758	3.62182	3.86268	0.438872																	309.5	53.78	50.38	53.07	51.02	51.64
	500	224540	223853	226104	224056	227816	227539	484	-3963	-1435	4.113	2.13905	3.23583																	310	56.1	52.59	55.38	53.29	53.88
																														310.5	57.99	54.4	57.3	55.11	55.71
								Average zero control =		-8751.33																				311	59.44	55.73	58.73	56.45	57.1
																														311.5	61.12	57.21	60.24	58.01	58.65
																														312	62.69	58.7	61.81	59.5	60.15
																														312.5	64.83	60.68	63.92	61.51	62.19
																														313	66.7	62.44	65.72	63.38	63.99
Figure 3d																														313.5	68.67	64.28	67.65	65.18	65.91
																														314	69.9	65.5	68.91	66.43	67.1
	Substrate conc. (µM)	Prerun						Run						Difference (Prerun - run)						Relative Fluorescence intensity (blank corrected)										314.5	71.3	66.62	70.15	67.65	68.36
		PCO4.Ni			BSA			PCO4.Ni+RAP2.12			BSA+RAP2.12			PCO4.Ni+RAP2.12			BSA+RAP2.12			PCO4.Ni+RAP2.12			BSA+RAP2.12							315	72.52	67.79	71.38	68.8	69.52
	50	172331	177554	176361	81298	83203	83685	180176	178272	181861	84040	89235	87341	7845	718	5500	2742	6032	3656	1188.67	-5938.33	-1156.33	-207.792	3082.21	706.208					315.5	74.4	69.52	73.19	70.59	71.32
	100	173521	180978	186263	82956	80679	81561	176840	181340	177469	86617	84011	86177	3319	362	-8794	3661	3332	4616	-3337.33	-6294.33	-15450.3	711.208	382.208	1666.21					316	76.2	71.19	74.92	72.2	73.03
	200	177890	179067	179309	83681	83017	84551	159645	158001	157150	87172	87135	88447	-18245	-21066	-22159	3491	4118	3896	-24901.3	-27722.3	-28815.3	541.208	1168.21	946.208					316.5	77.86	72.72	76.59	73.87	74.69
	300	179461	179211	179278	83666	83341	83081	138936	144309	142945	89345	88671	88978	-40525	-34902	-36333	5679	5330	5897	-47181.3	-41558.3	-42989.3	2729.21	2380.21	2947.21					317	79.51	74.23	78.13	75.4	76.18
	400	175523	178807	179710	81444	81823	84019	134076	128919	135281	87076	87335	89690	-41447	-49888	-44429	5632	5512	5671	-48103.3	-56544.3	-51085.3	2682.21	2562.21	2721.21					317.5	80.7	75.27	79.24	76.41	77.27
	500	173342	179903	179192	83626	82845	84919	121982	128179	129654	89365	87985	91001	-51360	-51724	-49538	5739	5140	6082	-58016.3	-58380.3	-56194.3	2789.21	2190.21	3132.21					318	81.92	76.47	80.49	77.65	78.5
	600	172357	177416	175489	83455	89283	81910	118778	122937	122360	89847	91861	88252	-53579	-54479	-53129	6392	2578	6342	-60235.3	-61135.3	-59785.3	3442.21	-371.792	3392.21					318.5	83.36	77.73	81.91	78.99	79.84
	750	174854	176632	176308	83253	88193	82994	116648	120068	122629	91476	98358	93498	-58206	-56564	-53679	8223	10165	10504	-64862.3	-63220.3	-60335.3	5273.21	7215.21	7554.21					319	84.96	79.33	83.45	80.54	81.42
		Prerun						Run						Difference (Run -Pre-run)																319.5	86.48	80.68	84.9	81.97	82.81
	Buffer controls	PCO4.Ni			BSA			PCO4.Ni+ Buffer			BSA+ Buffer			PCO4.Ni+ Buffer			BSA+ Buffer													320	87.77	81.89	86.17	83.18	84.11
		178330	175176	174901	83138	83076	85604	180522	182644	182417	86779	85632	87719	2192	7468	7516	3641	2556	2115											320.5	88.81	82.79	87.06	84.12	84.99
		173435	200220	175197	84171	85129	84582	183240	198788	184024	88194	87072	87221	9805	-1432	8827	4023	1943	2639											321	89.86	83.74	88.13	84.99	85.93
		175463	174902	174007	85074	85373	85629	179511	182273	180933	88354	87198	88322	4048	7371	6926	3280	1825	2693											321.5	90.99	84.76	89.21	86.1	87.07
		181519	176058	171571	86288	84089	85352	186364	183294	177909	88508	87148	88524	4845	7236	6338	2220	3059	3172											322	92.26	86.04	90.53	87.33	88.27
		178783	175485	173913	84993	85992	85851	182299	183390	177990	88108	88406	88683	3516	7905	4077	3115	2414	2832											322.5	93.37	87	91.46	88.29	89.3
		176637	177434	173740	85638	85132	86800	182200	184634	181164	88022	88184	89059	5563	7200	7424	2384	3052	2259											323	94.25	87.73	92.34	89.2	90.13
		185180	173397	172678	86126	87376	85454	185004	181547	184328	89876	90770	88605	-176	8150	11650	3750	3394	3151											323.5	95.03	88.39	92.99	89.87	90.8
		176942	172104	171027	82022	83598	86221	187737	181723	183916	87073	87300	88746	10795	9619	12889	5051	3702	2525											324	95.73	89.13	93.77	90.49	91.54
														Average zero control =		6656.33	Average zero control =		2949.79											324.5	96.46	89.79	94.43	91.22	92.21
																														325	97.16	90.39	95.12	91.93	92.92
																														325.5	97.86	91.13	95.89	92.51	93.6
																														326	98.34	91.51	96.25	92.95	94.04
																														326.5	98.78	91.86	96.59	93.39	94.4
																														327	99.01	92.04	96.88	93.59	94.61
																														327.5	99.35	92.4	97.15	93.89	94.96
																														328	99.5	92.48	97.32	94.08	95.13
																														328.5	99.82	92.7	97.58	94.34	95.37
																														329	99.89	92.86	97.58	94.42	95.47
																														329.5	100.01	92.82	97.71	94.43	95.51
																														330	100.05	92.83	97.64	94.41	95.53
																														330.5	100	92.77	97.59	94.38	95.46
																														331	99.89	92.73	97.55	94.33	95.4
																														331.5	99.83	92.6	97.39	94.2	95.32
																														332	99.59	92.37	97.21	93.97	95.04
																														332.5	99.37	92.19	97.01	93.8	94.85
																														333	99.19	91.96	96.78	93.56	94.66
																														333.5	98.85	91.65	96.49	93.31	94.36
																														334	98.53	91.38	96.08	92.97	94.05
																														334.5	98.01	90.87	95.67	92.47	93.58
																														335	97.49	90.4	95.08	91.94	93.05
																														335.5	97.1	90.02	94.68	91.52	92.61
																														336	96.68	89.59	94.27	91.17	92.21
																														336.5	96.18	89.15	93.77	90.67	91.79
																														337	95.64	88.62	93.27	90.21	91.25
																														337.5	94.91	87.89	92.57	89.45	90.54
																														338	94.2	87.18	91.81	88.8	89.81
																														338.5	93.53	86.63	91.15	88.13	89.23
																														339	92.97	86.07	90.56	87.6	88.6
																														339.5	92.23	85.33	89.82	86.83	87.87
																														340	91.42	84.59	89.04	86.04	87.06
																														340.5	90.41	83.67	87.95	85.14	86.12
																														341	89.45	82.75	87.04	84.21	85.22
																														341.5	88.61	81.97	86.23	83.43	84.4
																														342	87.83	81.27	85.5	82.66	83.67
																														342.5	86.99	80.5	84.72	81.93	82.87
																														343	86.09	79.63	83.77	81.03	81.98
																														343.5	84.95	78.59	82.63	79.98	80.89
																														344	83.9	77.59	81.66	78.95	79.93
																														344.5	83.02	76.7	80.75	78.06	79.01
																														345	82.2	76	79.95	77.34	78.27
																														345.5	81.31	75.12	79.06	76.44	77.39
																														346	80.21	74.16	78.03	75.47	76.39
																														346.5	78.97	72.95	76.75	74.26	75.13
																														347	77.77	71.79	75.57	73.11	73.97
																														347.5	76.61	70.75	74.47	72.05	72.93
																														348	75.64	69.85	73.56	71.17	71.99
																														348.5	74.62	68.9	72.52	70.19	71.01
																														349	73.53	67.87	71.43	69.16	69.93
																														349.5	72.19	66.68	70.11	67.86	68.7
																														350	70.97	65.5	68.92	66.67	67.5
																														350.5	69.85	64.44	67.83	65.6	66.4
																														351	68.9	63.57	66.92	64.75	65.53
																														351.5	67.89	62.67	65.95	63.84	64.6
																														352	66.85	61.72	64.86	62.79	63.58
																														352.5	65.55	60.48	63.68	61.59	62.32
																														353	64.36	59.41	62.5	60.45	61.26
																														353.5	63.28	58.37	61.47	59.45	60.16
																														354	62.32	57.53	60.55	58.56	59.24
																														354.5	61.37	56.66	59.63	57.69	58.36
																														355	60.37	55.67	58.64	56.71	57.38
																														355.5	59.02	54.5	57.39	55.5	56.13
																														356	57.82	53.32	56.15	54.29	54.95
																														356.5	56.85	52.41	55.18	53.34	54.01
																														357	55.87	51.54	54.26	52.47	53.11
																														357.5	55	50.77	53.36	51.67	52.23
																														358	53.92	49.69	52.3	50.61	51.22
																														358.5	52.83	48.68	51.26	49.59	50.21
																														359	51.7	47.64	50.17	48.52	49.12
																														359.5	50.74	46.75	49.22	47.59	48.16
																														360	49.87	45.92	48.38	46.77	47.31
																														360.5	49.08	45.19	47.61	46.02	46.58
																														361	48.08	44.31	46.63	45.1	45.64
																														361.5	47	43.31	45.6	44.11	44.64
																														362	45.85	42.25	44.49	43.01	43.55
																														362.5	44.88	41.34	43.49	42.07	42.61
																														363	44	40.52	42.63	41.26	41.76
																														363.5	43.14	39.76	41.85	40.45	40.99
																														364	42.28	38.94	41.03	39.66	40.15
																														364.5	41.28	38.02	40.04	38.7	39.19
																														365	40.4	37.24	39.19	37.89	38.35
																														365.5	39.36	36.26	38.19	36.9	37.34
																														366	38.66	35.57	37.48	36.22	36.67
																														366.5	37.88	34.91	36.75	35.54	35.96
																														367	37.18	34.24	36.04	34.86	35.3
																														367.5	36.28	33.41	35.17	34.02	34.41
																														368	35.45	32.66	34.38	33.23	33.63
																														368.5	34.59	31.82	33.53	32.4	32.84
																														369	33.84	31.19	32.87	31.76	32.16
																														369.5	33.22	30.62	32.23	31.18	31.54
																														370	32.47	29.9	31.5	30.45	30.82
																														370.5	31.64	29.13	30.69	29.68	30.03
																														371	30.78	28.34	29.85	28.86	29.22
																														371.5	30.05	27.66	29.12	28.15	28.52
																														372	29.41	27.09	28.5	27.54	27.91
																														372.5	28.81	26.54	27.95	27.03	27.36
																														373	28.16	25.92	27.32	26.39	26.71
																														373.5	27.35	25.18	26.54	25.65	25.97
																														374	26.62	24.54	25.85	24.97	25.29
																														374.5	25.94	23.9	25.18	24.32	24.64
																														375	25.45	23.42	24.67	23.86	24.15
																														375.5	24.89	22.94	24.19	23.37	23.65
																														376	24.39	22.45	23.68	22.91	23.15
																														376.5	23.71	21.86	23.04	22.26	22.52
																														377	23.01	21.19	22.36	21.6	21.87
																														377.5	22.4	20.63	21.75	21.01	21.26
																														378	21.86	20.14	21.23	20.51	20.76
																														378.5	21.44	19.77	20.83	20.11	20.36
																														379	20.96	19.32	20.36	19.65	19.9
																														379.5	20.41	18.82	19.85	19.17	19.4
																														380	19.84	18.29	19.27	18.62	18.85
																														380.5	19.25	17.74	18.72	18.08	18.3
																														381	18.85	17.38	18.32	17.69	17.9
																														381.5	18.44	17.02	17.97	17.32	17.54
																														382	18.1	16.68	17.6	16.98	17.19
																														382.5	17.61	16.22	17.14	16.53	16.74
																														383	17.13	15.78	16.66	16.07	16.27
																														383.5	16.64	15.36	16.19	15.63	15.82
																														384	16.3	15.02	15.85	15.29	15.48
																														384.5	15.98	14.76	15.58	15.03	15.21
																														385	15.61	14.41	15.21	14.66	14.87
																														385.5	15.21	14.04	14.83	14.29	14.47
																														386	14.78	13.64	14.41	13.88	14.05
																														386.5	14.41	13.3	14.02	13.53	13.71
																														387	14.1	12.99	13.74	13.23	13.4
																														387.5	13.79	12.73	13.44	12.95	13.13
																														388	13.5	12.45	13.14	12.68	12.84
																														388.5	13.11	12.12	12.8	12.32	12.5
																														389	12.77	11.81	12.45	12.02	12.16
																														389.5	12.43	11.48	12.14	11.69	11.83
																														390	12.17	11.23	11.88	11.44	11.59
																														390.5	11.94	11.05	11.68	11.23	11.38
																														391	11.7	10.8	11.43	11.01	11.15
																														391.5	11.42	10.54	11.14	10.73	10.87
																														392	11.06	10.23	10.82	10.42	10.57
																														392.5	10.73	9.95	10.5	10.12	10.24
																														393	10.49	9.7	10.27	9.87	10.01
																														393.5	10.27	9.51	10.05	9.68	9.8
																														394	10.07	9.32	9.86	9.49	9.62
																														394.5	9.79	9.05	9.58	9.23	9.34
																														395	9.5	8.79	9.31	8.95	9.08
																														395.5	9.25	8.56	9.05	8.71	8.82
																														396	9.03	8.36	8.84	8.5	8.62
																														396.5	8.85	8.19	8.67	8.35	8.45
																														397	8.67	8.03	8.5	8.17	8.27
																														397.5	8.43	7.81	8.28	7.96	8.05
																														398	8.21	7.61	8.07	7.75	7.87
																														398.5	7.99	7.4	7.84	7.54	7.63
																														399	7.82	7.25	7.69	7.37	7.47
																														399.5	7.65	7.1	7.53	7.23	7.31
																														400	7.49	6.94	7.36	7.08	7.17

## Sheet: Figure 4
Note: Absolute fluorescence intensity shown.
		Key	Substrate controls (same substrate control was used for both AtPCO4 and AtPCO5)
			AtPCO4
			AtPCO5
Figure 4a
	Substrate conc. (µM)	Prerun						Run						Difference (Prerun - run)						Corrected for substrate FI			Percentage Quenching
		Buffer.Ni			PCO4.Ni			Buffer.Ni + RAP2.12			PCO4.Ni+RAP2.12			Buffer.Ni + RAP2.12			PCO4.Ni+RAP2.12			PCO4.Ni+RAP2.12			PCO4.Ni+RAP2.12
	0	6555	6602	6512	178286	178097	173379	6588	6541	6541	183360	184787	181585	-33	61	-29	-5073.5	-6689.62	-8205.88	-5040.5	-6750.62	-8176.88	0.906128	-0.0531312	-0.877196
AtPCO4 + RAP2.12	50	6720	6806	6876	172331	177554	176361	6510	6640	6719	180176	178272	181861	210	166	157	-7845	-718	-5500	-8055	-884	-5657	-0.81181	3.25084	0.566452
	100	6590	6477	6575	173521	180978	186263	6367	6389	6459	176840	181340	177469	223	88	116	-3319	-362	8794	-3542	-450	8678	1.7946	3.42915	8.23245
	200	6849	6967	6504	177890	179067	179309	6761	6927	6581	159645	158001	157150	88	40	-77	18245	21066	22159	18157	21026	22236	13.9485	15.459	16.113
	300	6930	7408	6511	179461	179211	179278	6974	7476	6560	138936	144309	142945	-44	-68	-49	40525	34902	36333	40569	34970	36382	26.3149	23.2274	24.0063
	400	6988	6556	6384	175523	178807	179710	7009	6611	6534	134076	128919	135281	-21	-55	-150	41447	49888	44429	41468	49943	44579	27.4175	31.6537	28.5098
	500	6561	6822	6672	173342	179903	179192	6762	6938	6823	121982	128179	129654	-201	-116	-151	51360	51724	49538	51561	51840	49689	33.5851	32.5153	31.4439
	600	6490	6624	6652	172357	177416	175489	6822	6875	6911	118778	122937	122360	-332	-251	-259	53579	54479	53129	53911	54730	53388	35.1404	34.6	34.2152
	750	6622	6420	7450	174854	176632	176308	6897	6835	7783	116648	120068	122629	-275	-415	-333	58206	56564	53679	58481	56979	54012	37.2522	36.0269	34.4102
																				Average zero control =		-6656
Figure 4b
	Substrate conc. (µM)	Prerun						Run						Difference (Prerun - run)						Corrected for substrate FI			Percentage Quenching
		Buffer.Ni			PCO5.Ni			Buffer.Ni + RAP2.12			PCO5.Ni+RAP2.12			Buffer.Ni + RAP2.12			PCO5.Ni+RAP2.12			PCO5.Ni+RAP2.12			PCO5.Ni+RAP2.12
	0	6555	6602	6512	178899	185596	184571	6588	6541	6541	183912	187268	181674	-33	61	-29	-5012.12	-1672.5	2897.75	-4979.12	-1733.5	2926.75	-2.0778	-0.254069	2.26942
AtPCO5 + RAP2.12	50	6720	6806	6876	187047	178568	176992	6510	6640	6719	177062	181387	175539	210	166	157	9985	-2819	1453	9775	-2985	1296	5.90063	-0.964922	1.44524
	100	6590	6477	6575	183520	178088	178156	6367	6389	6459	181342	181606	176643	223	88	116	2178	-3518	1513	1955	-3606	1397	1.75292	-1.31623	1.49249
	200	6849	6967	6504	187271	178271	178750	6761	6927	6581	174166	173106	168283	88	40	-77	13105	5165	10467	13017	5125	10544	7.62476	3.58272	6.60473
	300	6930	7408	6511	184685	181908	178520	6974	7476	6560	161329	157150	159032	-44	-68	-49	23356	24758	19488	23400	24826	19537	13.3535	14.3413	11.6508
	400	6988	6556	6384	189651	181010	181722	7009	6611	6534	157728	150427	151901	-21	-55	-150	31923	30583	29821	31944	30638	29971	17.509	17.6233	17.1872
	500	6561	6822	6672	188807	180749	178080	6762	6938	6823	152373	147847	145697	-201	-116	-151	36434	32902	32383	36635	33018	32534	20.0718	18.9655	18.978
	600	6490	6624	6652	186858	179131	177352	6822	6875	6911	150973	148816	143782	-332	-251	-259	35885	30315	33570	36217	30566	33829	20.0575	17.768	19.7861
	750	6622	6420	7450	188931	181141	178718	6897	6835	7783	151535	142940	144884	-275	-415	-333	37396	38201	33834	37671	38616	34167	20.607	22.0149	19.8239
																				Average zero control =		-1261.96
Figure 4c
	Substrate conc. (µM)	Prerun						Run						Difference (Prerun - run)						Corrected for substrate FI			Percentage Quenching
		Buffer.Ni			PCO4.Ni			Buffer.Ni + HRE1			PCO4.Ni+HRE1			Buffer.Ni + HRE1			PCO4.Ni+HRE1			PCO4.Ni+HRE1			PCO4.Ni+HRE1
	0	6669	6539	6801	156314	156788	154598	6530	6420	6934	159293	158471	155596	139	119	-133	-2978.75	-1683.25	-997.5	-3117.75	-1802.25	-864.5	-1.99454	-1.14948	-0.559192
AtPCO4 + HRE1	50	6782	6727	7249	152281	152200	154700	7121	6945	7388	136279	150344	152459	-339	-218	-139	16002	1856	2241	16341	2074	2380	10.7308	1.36268	1.53846
	100	6659	6485	6438	155091	151423	156726	7333	7229	7177	148383	152029	155366	-674	-744	-739	6708	-606	1360	7382	138	2099	4.75979	0.0911354	1.33928
	200	6764	6952	6984	153468	152725	157485	8360	8542	8547	143568	141900	145917	-1596	-1590	-1563	9900	10825	11568	11496	12415	13131	7.49081	8.12899	8.33794
	300	6785	6792	6562	154359	155306	156469	10124	9404	9232	132826	132634	132733	-3339	-2612	-2670	21533	22672	23736	24872	25284	26406	16.1131	16.2801	16.8762
	400	6284	6622	6309	155008	155285	159194	9762	9490	9153	117299	124019	126335	-3478	-2868	-2844	37709	31266	32859	41187	34134	35703	26.5709	21.9815	22.4274
	500	6716	6934	6628	154486	155780	161138	10196	10698	10368	113382	120381	120218	-3480	-3764	-3740	41104	35399	40920	44584	39163	44660	28.8596	25.1399	27.7154
	600	6752	6756	6652	152979	154830	158946	12117	11558	9892	108543	114504	115772	-5365	-4802	-3240	44436	40326	43174	49801	45128	46414	32.5541	29.1468	29.2011
	750	6623	6338	8693	153846	154113	154533	12188	11116	11663	111401	115774	112093	-5565	-4778	-2970	42445	38339	42440	48010	43117	45410	31.2065	27.9775	29.3853
																				Average zero control =		-1928.17
Figure 4d
	Substrate conc. (µM)	Prerun						Run						Difference (Prerun - run)						Corrected for substrate FI			Percentage Quenching
		Buffer.Ni			PCO5.Ni			Buffer.Ni + HRE1			PCO5.Ni+HRE1			Buffer.Ni + HRE1			PCO5.Ni+HRE1			PCO5.Ni+HRE1			PCO5.Ni+HRE1
	0	6669	6539	6801	167004	166146	168223	6530	6420	6934	168984	167034	167191	139	119	-133	-1979.62	-888.25	1031.38	-2118.62	-1007.25	1164.38	-0.877099	-0.212715	1.08083
AtPCO5 + HRE1	50	6782	6727	7249	160881	162636	163114	7121	6945	7388	158531	162886	161073	-339	-218	-139	2350	-250	2041	2689	-32	2180	2.07783	0.382347	1.73733
	100	6659	6485	6438	164984	162657	163701	7333	7229	7177	161638	161188	158197	-674	-744	-739	3346	1469	5504	4020	2213	6243	2.8329	1.7625	4.21307
	200	6764	6952	6984	161333	161212	165019	8360	8542	8547	150023	151745	151167	-1596	-1590	-1563	11310	9467	13852	12906	11057	15415	8.40487	7.26424	9.73757
	300	6785	6792	6562	164740	164779	165129	10124	9404	9232	141252	141816	141253	-3339	-2612	-2670	23488	22963	23876	26827	25575	26546	16.6813	15.9176	16.4719
	400	6284	6622	6309	164565	164399	164103	9762	9490	9153	138721	138573	137240	-3478	-2868	-2844	25844	25826	26863	29322	28694	29707	18.2152	17.8516	18.5011
	500	6716	6934	6628	164454	161983	154330	10196	10698	10368	138357	136440	128795	-3480	-3764	-3740	26097	25543	25535	29577	29307	29275	18.3825	18.4963	19.3928
	600	6752	6756	6652	164813	165010	164018	12117	11558	9892	135692	135211	135633	-5365	-4802	-3240	29121	29799	28385	34486	34601	31625	21.321	21.3653	19.6801
	750	6623	6338	8693	164526	165059	162424	12188	11116	11663	134942	135238	131898	-5565	-4778	-2970	29584	29821	30526	35149	34599	33496	21.7612	21.3577	21.0251
																				Average zero control =		-653.833
Figure 4e
	Substrate conc. (µM)	Prerun						Run						Difference (Prerun - run)						Corrected for substrate FI			Percentage Quenching
		Buffer.Ni			PCO4.Ni			Buffer.Ni + ZPR2			PCO4.Ni+ZPR2			Buffer.Ni + ZPR2			PCO4.Ni+ZPR2			PCO4.Ni+ZPR2			PCO4.Ni+ZPR2
	0	6732	6849	6923	195856	192815	190425	6698	6880	6916	208437	205296	200689	34	-31	7	-12581.4	-12480.6	-10263.8	-12615.4	-12449.6	-10270.8	-0.427248	-0.348023	0.791824
AtPCO4 + ZPR2	50	7012	6743	6944	190585	189036	195286	6726	6517	6703	203295	201316	208172	286	226	241	-12710	-12280	-12886	-12996	-12506	-13127	-0.638779	-0.384803	-0.690483
	100	6721	6853	7019	189859	187025	188406	6437	6595	6700	199427	201311	202116	284	258	319	-9568	-14286	-13710	-9852	-14544	-14029	1.01474	-1.47863	-1.19445
	200	6871	6779	6877	188278	185132	186778	6616	6473	6548	195254	191285	195848	255	306	329	-6976	-6153	-9070	-7231	-6459	-9399	2.41536	2.8734	1.27402
	300	6896	6650	6915	184128	175916	186260	6633	6350	6605	189160	179591	190147	263	300	310	-5032	-3675	-3887	-5295	-3975	-4197	3.52124	4.43597	4.07043
	400	6577	6918	6923	176106	178572	179213	6187	6542	6466	176379	177457	171791	390	376	457	-273	1115	7422	-663	739	6965	6.31187	7.00982	10.4588
	500	6811	6874	6848	185064	177901	183160	6482	6473	6455	179030	172754	180691	329	401	393	6034	5147	2469	5705	4746	2076	9.44732	9.28864	7.5642
	600	7109	6555	6748	183427	176128	183441	6722	6212	6416	187208	171094	174208	387	343	332	-3781	5034	9233	-4168	4691	8901	4.14911	9.35092	11.2732
	750	6749	6812	7019	176926	174175	181626	6418	6354	6556	166264	160113	166874	331	458	463	10662	14062	14752	10331	13604	14289	12.4965	14.573	14.3523
																				Average zero control =		-11778.6
Figure 4f
	Substrate conc. (µM)	Prerun						Run						Difference (Prerun - run)						Corrected for substrate FI			Percentage Quenching
		Buffer.Ni			PCO5.Ni			Buffer.Ni + ZPR2			PCO5.Ni+ZPR2			Buffer.Ni + ZPR2			PCO5.Ni+ZPR2			PCO5.Ni+RAP2.12			PCO5.Ni+ZPR2
	0	6732	6849	6923	180957	182861	179214	6698	6880	6916	188996	188059	191636	34	-31	7	-8038.88	-5198.5	-12422	-8072.88	-5167.5	-12429	0.267237	1.8533	-2.16085
AtPCO5 + ZPR2	50	7012	6743	6944	182939	192159	191918	6726	6517	6703	188274	196712	191272	286	226	241	-5335	-4553	646	-5621	-4779	405	1.60461	1.9658	4.66942
	100	6721	6853	7019	179200	189003	187992	6437	6595	6700	188162	195879	193445	284	258	319	-8962	-6876	-5453	-9246	-7134	-5772	-0.384789	0.752612	1.48116
	200	6871	6779	6877	185279	189972	188739	6616	6473	6548	186713	193635	192806	255	306	329	-1434	-3663	-4067	-1689	-3969	-4396	3.70655	2.41481	2.20434
	300	6896	6650	6915	184883	187122	188832	6633	6350	6605	186593	188186	189542	263	300	310	-1710	-1064	-710	-1973	-1364	-1020	3.56088	3.84373	3.99109
	400	6577	6918	6923	183832	197792	186142	6187	6542	6466	181605	193117	185129	390	376	457	2227	4675	1013	1837	4299	556	5.65378	6.49948	4.89543
	500	6811	6874	6848	176337	195626	187682	6482	6473	6455	177139	182334	182423	329	401	393	-802	13292	5259	-1131	12891	4866	4.21095	10.9635	7.1517
	600	7109	6555	6748	175161	194030	183076	6722	6212	6416	173712	187243	178001	387	343	332	1449	6787	5075	1062	6444	4743	5.49121	7.731	7.26445
	750	6749	6812	7019	164105	182354	182062	6418	6354	6556	163307	174034	175846	331	458	463	798	8320	6216	467	7862	5753	5.49859	9.00362	7.85966
																				Average zero control =		-8556.46
Figure 4g
	Substrate conc. (µM)	Prerun						Run						Difference (Prerun - run)						Corrected for substrate FI			Percentage Quenching
		Buffer.Ni			PCO4.Ni			Buffer.Ni + VRN2			PCO4.Ni+VRN2			Buffer.Ni + VRN2			PCO4.Ni+VRN2			PCO4.Ni+VRN2			PCO4.Ni+VRN2
	0	6887	6933	7111	203215	204957	204089	6712	6790	6985	212760	213269	211982	175	143	126	-9545.5	-8311.62	-7893	-9720.5	-8454.62	-8019	-0.486738	0.135028	0.349052
AtPCO4 + VRN2	50	6769	7367	7271	204685	201546	205204	6410	6877	6789	208155	204541	203847	359	490	482	-3470	-2995	1357	-3829	-3485	875	2.39508	2.60307	4.68138
	100	6618	6770	6773	201047	199917	200837	6156	6301	6281	204673	194667	203028	462	469	492	-3626	5250	-2191	-4088	4781	-2683	2.3096	6.75899	3.01158
	200	6958	6659	7111	205904	204866	206110	6475	6219	6570	200097	190026	194663	483	440	541	5807	14840	11447	5324	14400	10906	6.82618	11.291	9.52762
	300	6987	6736	7029	210022	206976	207784	6450	6170	6467	195212	191180	192130	537	566	562	14810	15796	15654	14273	15230	15092	10.9533	11.5769	11.4655
	400	6636	6852	6976	212699	212968	211413	6031	6379	6313	193539	192519	192886	605	473	663	19160	20449	18527	18555	19976	17864	12.8286	13.4797	12.5798
	500	6954	6831	7065	211659	208519	208990	6393	6276	6496	188715	184725	186207	561	555	569	22944	23794	22783	22383	23239	22214	14.7002	15.3321	14.8071
	600	6079	7068	6966	207861	208778	208635	5533	6458	6446	182839	168178	183020	546	610	520	25022	40600	25615	24476	39990	25095	15.9758	23.3365	16.2132
	750	6844	6902	6915	209721	202485	207807	6320	6386	6309	180068	161678	178749	524	516	606	29653	40807	29058	29129	40291	28452	18.0527	24.2104	17.8932
																				Average zero control =		-8731.38
Figure 4h
	Substrate conc. (µM)	Prerun						Run						Difference (Prerun - run)						Corrected for substrate FI			Percentage Quenching
		Buffer.Ni			PCO5.Ni			Buffer.Ni + VRN2			PCO5.Ni+VRN2			Buffer.Ni + VRN2			PCO5.Ni+VRN2			PCO5.Ni+VRN2			PCO5.Ni+VRN2
	0	6887	6933	7111	150835	159318	154986	6712	6790	6985	153361	159631	156198	175	143	126	-2526.25	-313.875	-1211.25	-2701.25	-456.875	-1337.25	-0.797422	0.653778	0.104014
AtPCO5 + VRN2	50	6769	7367	7271	143888	149165	147586	6410	6877	6789	157013	142957	144806	359	490	482	-13125	6208	2780	-13484	5718	2298	-8.32977	4.8379	2.57237
	100	6618	6770	6773	148225	146769	147925	6156	6301	6281	139915	139300	137727	462	469	492	8310	7469	10198	7848	7000	9706	6.30559	5.79036	7.57442
	200	6958	6659	7111	149866	149065	151183	6475	6219	6570	139846	138637	139074	483	440	541	10020	10428	12109	9537	9988	11568	7.36355	7.70567	8.64281
	300	6987	6736	7029	142851	149947	151576	6450	6170	6467	133648	143730	138429	537	566	562	9203	6217	13147	8666	5651	12585	7.11543	4.76799	9.29135
	400	6636	6852	6976	150833	150774	150979	6031	6379	6313	139433	138296	135863	605	473	663	11400	12478	15116	10795	12005	14453	8.15038	8.95609	10.5653
	500	6954	6831	7065	147493	150247	154970	6393	6276	6496	136157	136951	137410	561	555	569	11336	13296	17560	10775	12741	16991	8.32138	9.47737	11.931
	600	6079	7068	6966	154348	157567	149196	5533	6458	6446	137563	141521	134106	546	610	520	16785	16046	15090	16239	15436	14570	11.4919	10.7475	10.77
	750	6844	6902	6915	148705	148820	150411	6320	6386	6309	133890	135163	134818	524	516	606	14815	13657	15593	14291	13141	14987	10.618	9.83702	10.9603
																				Average zero control =		-1498.46

## Sheet: Table1
	AtPCO4-RAP2.12	AtPCO5-RAP2.12	AtPCO4-HRE1	AtPCO5-HRE1	AtPCO4-ZPR2			* Data analyis files from GraphPad Prism (v 10.1.1).
One site -- Specific binding with Hill slope
Best-fit values
Bmax	38.46	20.96	36.48	22.2	21.1
h	2.319	3.536	2.263	2.554	2.006
Kd	238.4	258.4	298.4	223.2	633.7
Std. Error
Bmax	1.399	1.028	3.844	0.7565	13.81
h	0.2122	0.639	0.4562	0.2631	0.8167
Kd	11.56	14.26	37.67	10.29	420.6
95% CI (asymptotic)
Bmax	35.57 to 41.35	18.83 to 23.08	28.54 to 44.41	20.64 to 23.76	-7.401 to 49.60
h	1.881 to 2.757	2.217 to 4.855	1.322 to 3.205	2.011 to 3.098	0.3208 to 3.692
Kd	214.5 to 262.3	229.0 to 287.8	220.6 to 376.1	202.0 to 244.5	-234.5 to 1502
Goodness of Fit
Degrees of Freedom	24	24	24	24	24
R squared	0.9888	0.9607	0.9466	0.9855	0.8772
Sum of Squares	59.72	74.51	207.1	27.13	76.76
Sy.x	1.577	1.762	2.938	1.063	1.788
Number of points
# of X values	27	27	27	27	27
# Y values analyzed	27	27	27	27	27
	AtPCO5-ZPR2
Comparison of Fits
Null hypothesis	One site -- Specific binding
Alternative hypothesis	One site -- Specific binding with Hill slope
P value	0.861
Conclusion (alpha = 0.05)	Do not reject null hypothesis
Preferred model	One site -- Specific binding
F (DFn, DFd)	0.03133 (1, 24)
One site -- Specific binding
Best-fit values
Bmax	15.15
Kd	692.3
Std. Error
Bmax	6.576
Kd	513.4
95% CI (asymptotic)
Bmax	1.608 to 28.70
Kd	-365.0 to 1750
Goodness of Fit
Degrees of Freedom	25
R squared	0.6746
Sum of Squares	81.83
Sy.x	1.809
One site -- Specific binding with Hill slope
Best-fit values
Bmax	20.74
h	0.8596
Kd	1311
Std. Error
Bmax	49.29
h	0.6637
Kd	6237
95% CI (asymptotic)
Bmax	-80.99 to 122.5
h	-0.5102 to 2.229
Kd	-11562 to 14185
Goodness of Fit
Degrees of Freedom	24
R squared	0.675
Sum of Squares	81.72
Sy.x	1.845
Number of points
# of X values	27
# Y values analyzed	27
	AtPCO4-VRN2	AtPCO5-VRN2
One site -- Specific binding
Best-fit values
Bmax	29.87	11.88
Kd	495	107.3
Std. Error
Bmax	3.156	0.8332
Kd	98.44	29.68
95% CI (asymptotic)
Bmax	23.32 to 36.41	10.16 to 13.60
Kd	290.8 to 699.1	45.93 to 168.7
Goodness of Fit
Degrees of Freedom	22	23
R squared	0.9599	0.8362
Sum of Squares	31.38	40.6
Sy.x	1.194	1.329
Number of points
# of X values	27	27
# Y values analyzed	24	25
